# Supplementary material for: MicroRNAs Associated with the Efficacy of Photodynamic Therapy in Biliary Tract Cancer Cell Lines
Source: MDPI journal article supplement (doi:10.3390/ijms151120134), 2014-11-05

# Supplementary Information

**Figure S1.** \* For this plot phototoxicity was corrected for uptake (fluorimetry, rel. FI, a.u.). All other plots in this supplement show uncorrected viability. In this case (miR-20a\*), correlations with miR expression are significant for all three treatments, if uptake-corrected phototoxicity is taken into account (see also Figure 2). \*  $p < 0.05$ , \*\*  $p < 0.01$ .

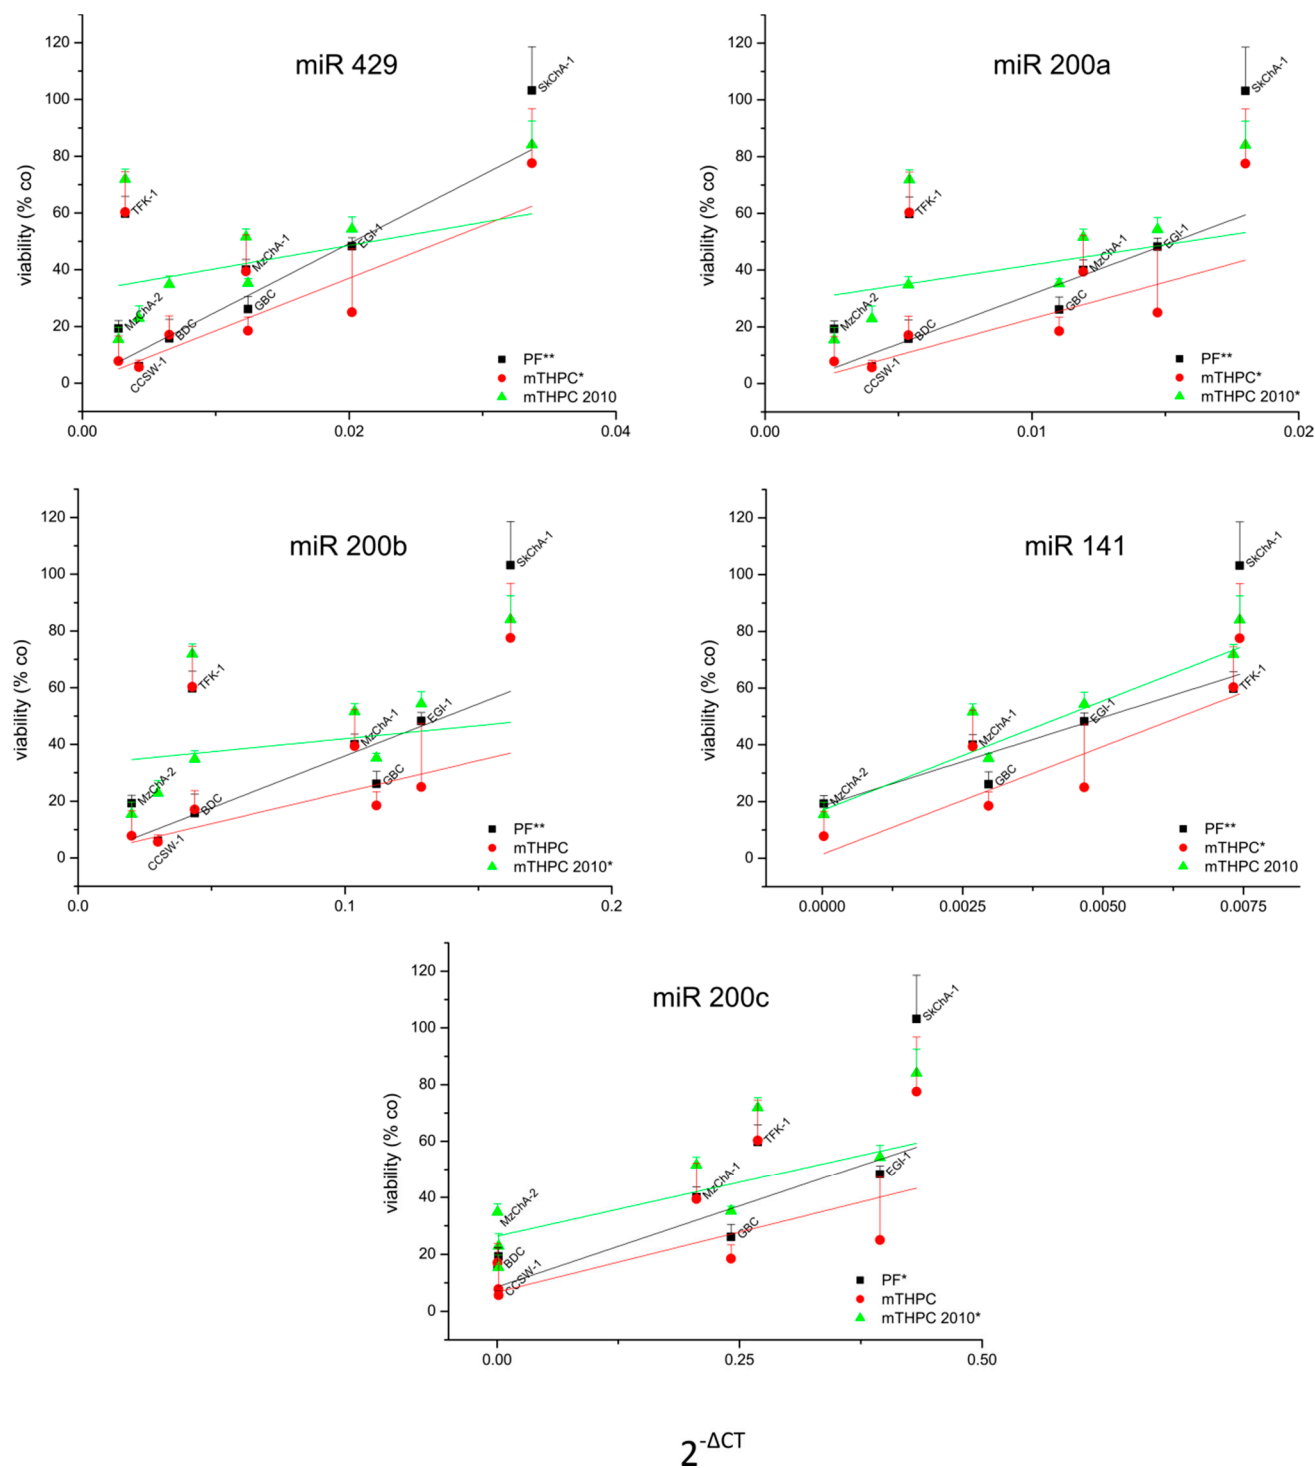

Figure S1. *Cont.*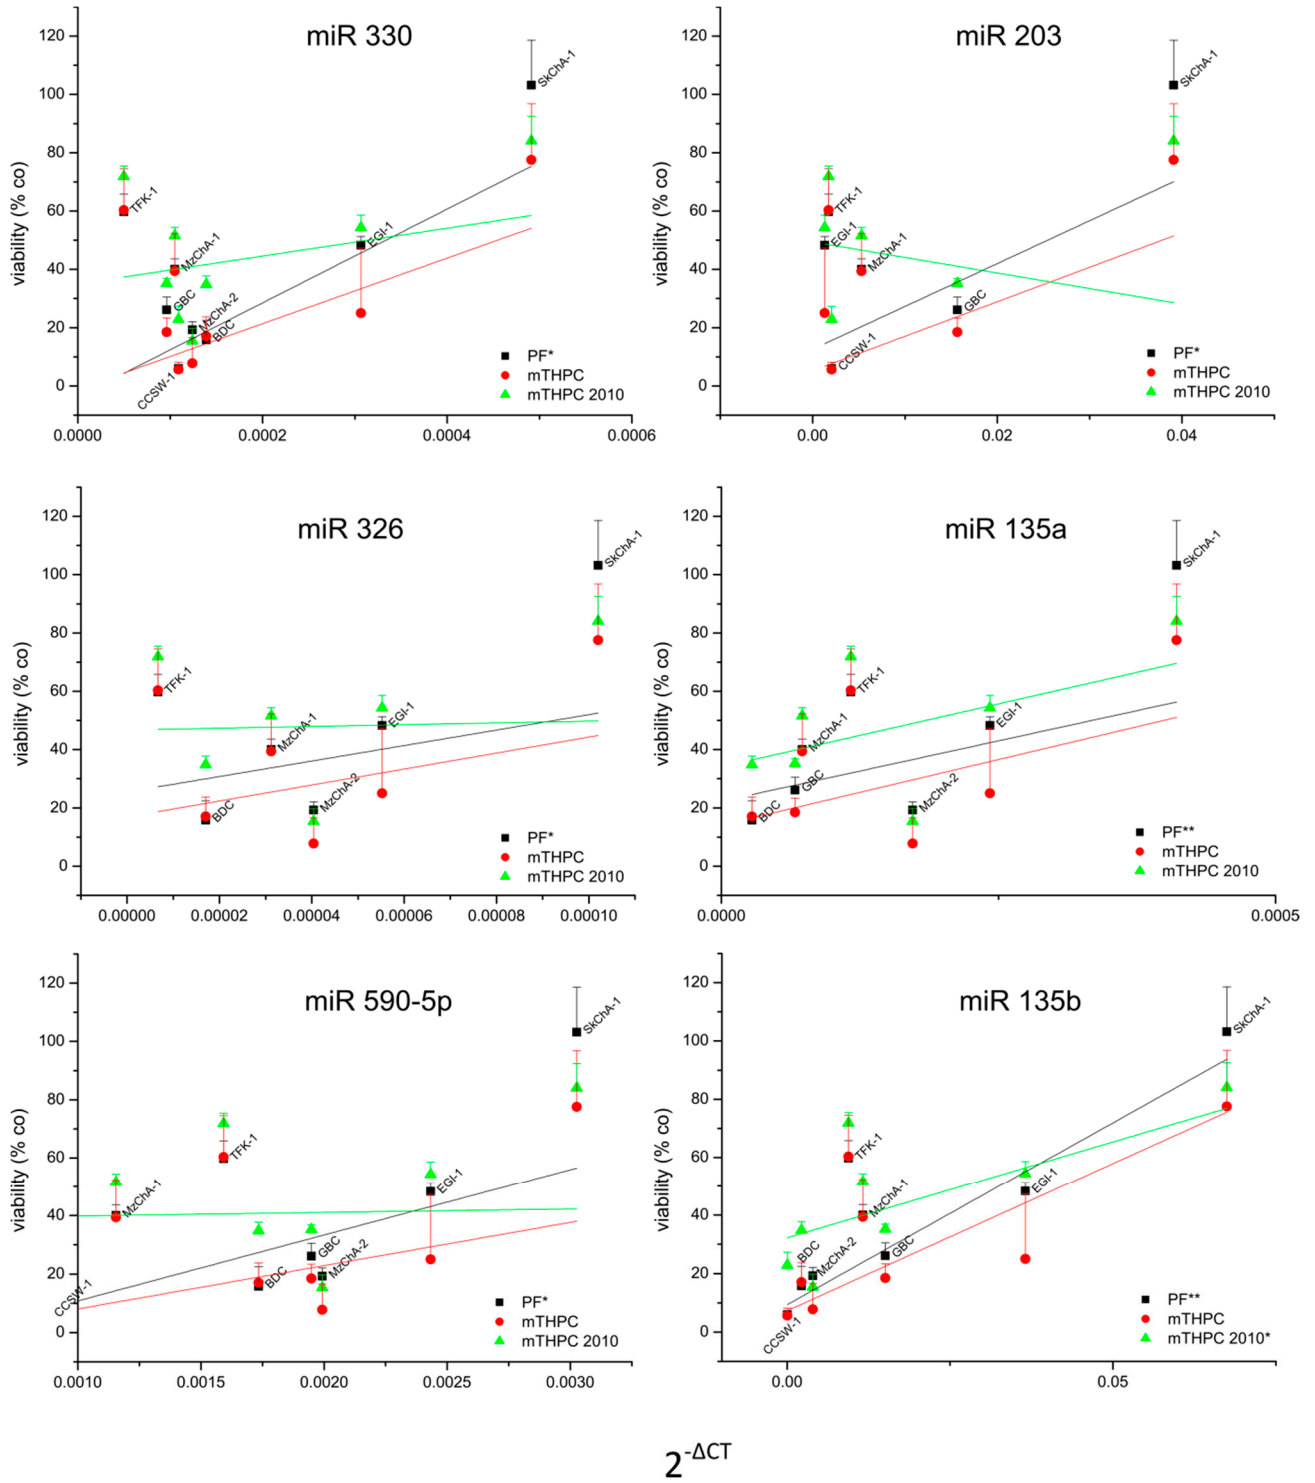

Figure S1. Cont.

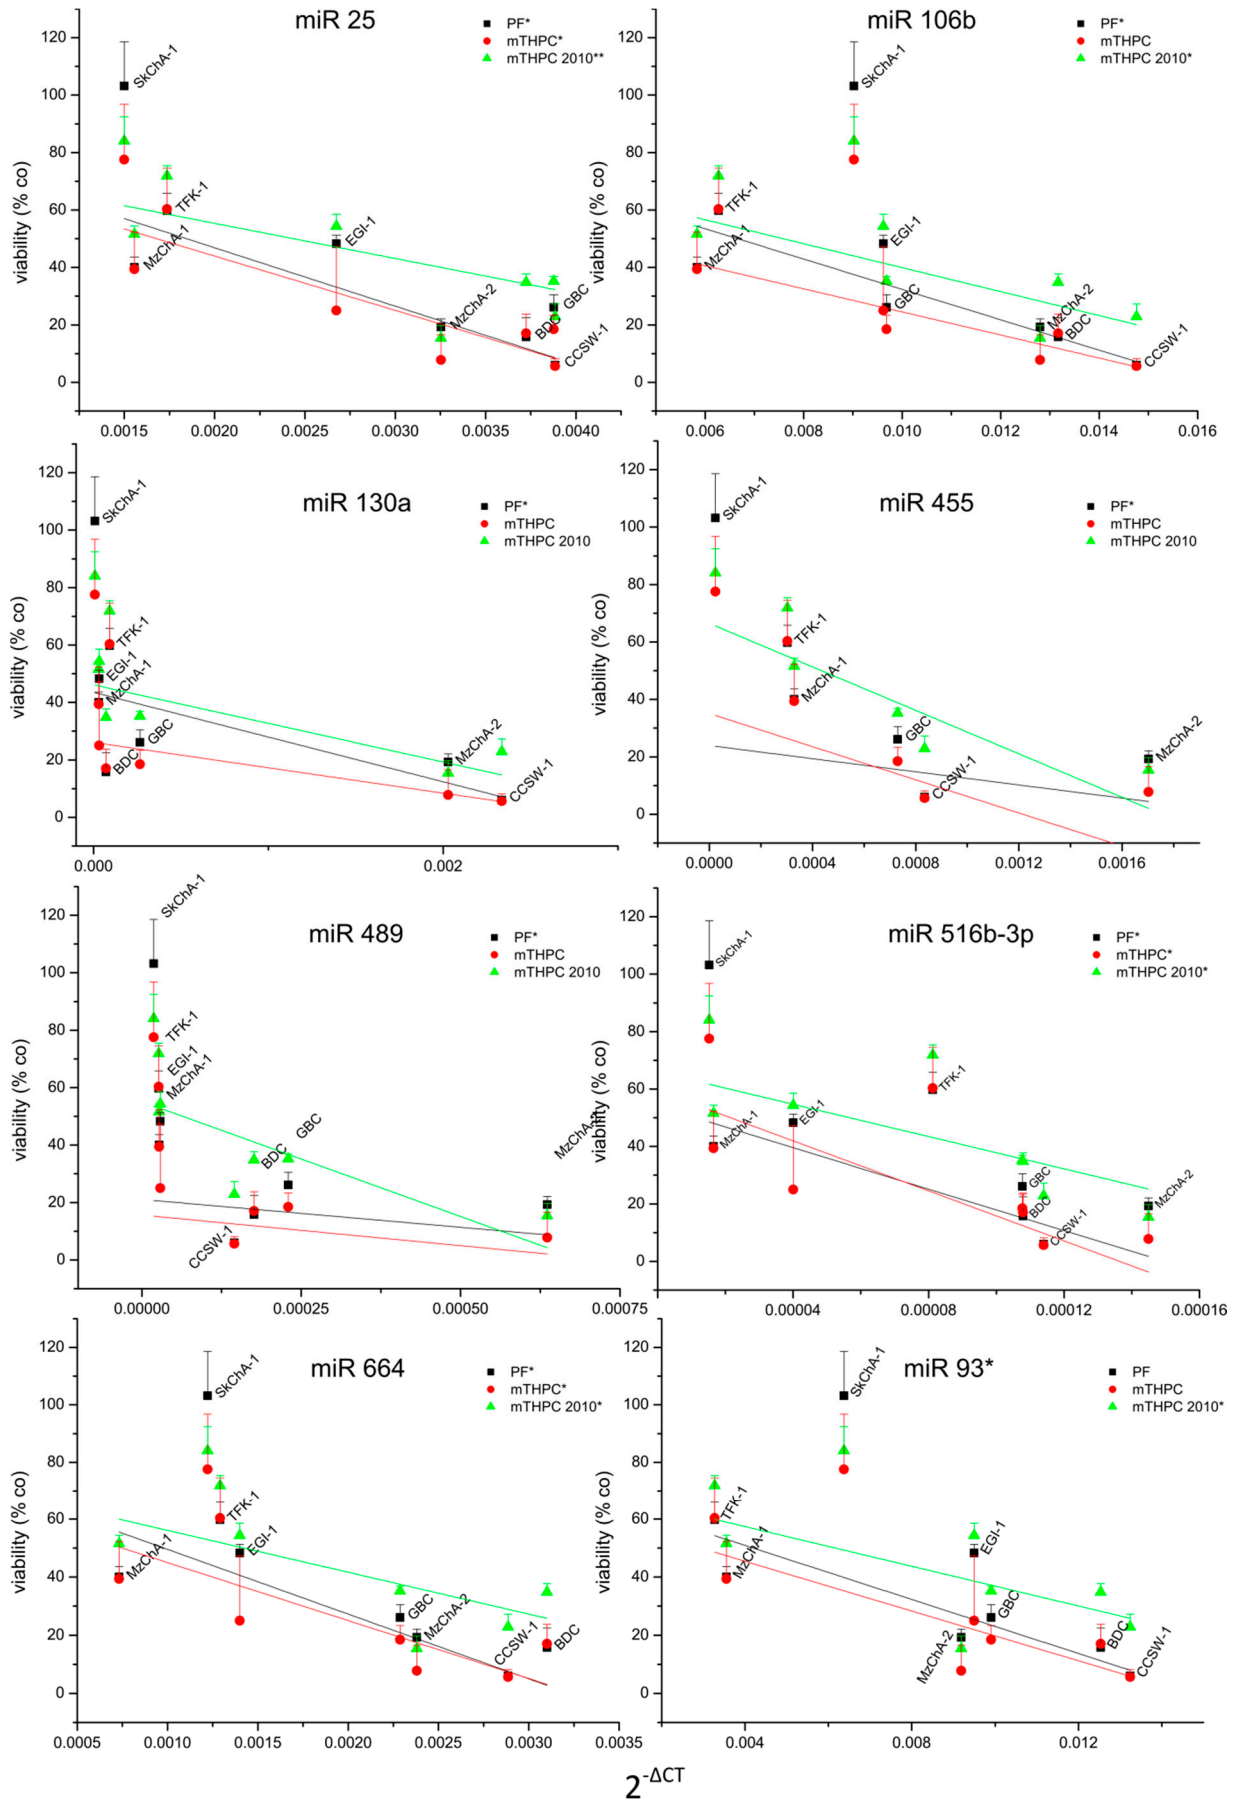

Figure S1. *Cont.*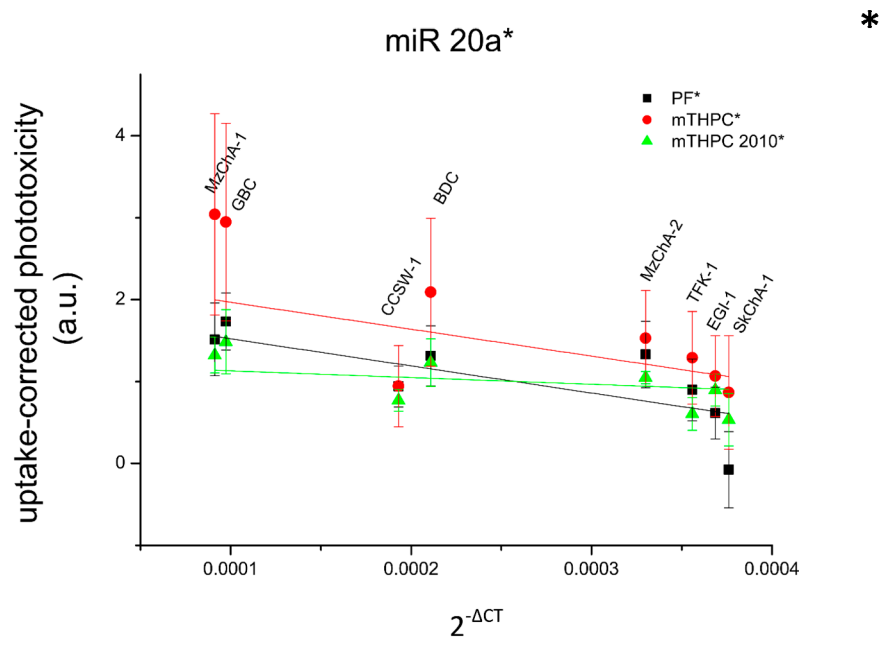

Supplement: s1 [file s1]
