# Supplementary material for: MicroRNAs Associated with the Efficacy of Photodynamic Therapy in Biliary Tract Cancer Cell Lines
Source: MDPI journal article supplement (doi:10.3390/ijms151120134), 2014-11-05
Supplement: s1 [file s1]

# Supplementary Information

**Table S1.** Possible PDT-related mechanisms and association with targets predicted for “resistive-” and “phototox-miRs”.

| Mechanism                    | MiR(s)                                      | Target(s)/GO Terms                                           | p/v | Enriched Targets in the Corresponding GO Terms                                                                                                                                                                                | Function (Citation) |
|------------------------------|---------------------------------------------|--------------------------------------------------------------|-----|-------------------------------------------------------------------------------------------------------------------------------------------------------------------------------------------------------------------------------|---------------------|
| response to oxidative stress | 130a                                        | “response to oxidative stress”                               |     | GO: 0006979, SLC11A2, APOA4, FOS, HIF1A, G6PD, SIRT7, PRDX3                                                                                                                                                                   | tox -               |
| cellular glutathione content | 130a                                        | negative correlation with GSH levels                         | -   | -                                                                                                                                                                                                                             | tox [104]           |
| thioredoxin redox system     | 130a                                        | PRDX3                                                        | p   | -                                                                                                                                                                                                                             | tox [9,51]          |
| NF-κB                        | 25, 130a, 203, 20a*                         | “positive regulation of NF-κB transcription factor activity” | -   | GO: 0051092, miR-25: IL6, TNF, KRAS, IL1B, TLR4, TGFB1, miR-130a: IRAK1, RELA, IL1B, PRDX3, IKBKB, TGFB1, miR-203: IL6, TNF, KRAS, IL1B, TLR4, IKBKB, TGFB1, miR-20a*: IL6, TNF, KRAS, RIPK1, NPM1, TGFB3, IL1B, MALT1, TGFB1 | tox [62,105]        |
|                              | 25                                          | TRAF6                                                        | p   | -                                                                                                                                                                                                                             | inv                 |
|                              | 106b                                        | MAP3K8                                                       | p   | -                                                                                                                                                                                                                             | tox                 |
| AP-1                         | 326                                         | HDAC10                                                       | p   | -                                                                                                                                                                                                                             | res [106,107]       |
|                              | 330-5p                                      | HDAC3                                                        | p   | -                                                                                                                                                                                                                             | res                 |
| Nrf2                         | 141, 200a,                                  | KEAP1                                                        | p   |                                                                                                                                                                                                                               | res                 |
|                              | 130a, 93*                                   | NFE2                                                         | v   | -                                                                                                                                                                                                                             | tox [9,29,74,82]    |
|                              | 326                                         | NFE2                                                         | p   |                                                                                                                                                                                                                               | tox                 |
| HIF-1α                       | 141, 200c, 135a, 20a*                       | HIF-1α                                                       | v   | -                                                                                                                                                                                                                             | tox                 |
|                              | 130a                                        | HIF-1α                                                       | p   | -                                                                                                                                                                                                                             | tox                 |
|                              | 106b, 939                                   | ARNT2                                                        | p   | -                                                                                                                                                                                                                             | tox                 |
|                              | 106b, 93*, 141, 200a, 20a*, 200b, 200c, 330 | VEGFA                                                        | v   | -                                                                                                                                                                                                                             | tox [52,53,55,108]  |
|                              | 130a                                        | “positive regulation of angiogenesis”                        | -   | GO: 0045766, CHIF1A, F3, IL1B, NOS3, IL1A                                                                                                                                                                                     | tox                 |
|                              |                                             |                                                              |     |                                                                                                                                                                                                                               |                     |

Table S1. *Cont.*

| Mechanism              | MiR(s)                                 | Target(s)/GO Terms                                                       | p/v | Enriched Targets in the Corresponding GO Terms                                                                                                                                                                                                                                                                                                                                                                                                     |  | Function<br>(Citation) |
|------------------------|----------------------------------------|--------------------------------------------------------------------------|-----|----------------------------------------------------------------------------------------------------------------------------------------------------------------------------------------------------------------------------------------------------------------------------------------------------------------------------------------------------------------------------------------------------------------------------------------------------|--|------------------------|
| JNK and<br>p38 pathway | 200a, 200b,<br>200c, 429,<br>203, 20a* | “positive regulation of MAP<br>kinase activity”                          | -   | GO: 0043406, miR-200c: EGFR, PROK2, KRAS, ERBB2, MET, MAP3K10, ZEB2, HGF, PAK1, EGF, TGFB1,<br>miR-200a: EGFR, KRAS, PDGFB, MET, MAP3K10, ZEB2, HGF, EGF, THBS1, TGFB1, HTR2A, miR-200b: EGFR, PROK2,<br>MET, MAP3K10, ZEB2, EGF, THBS1, TGFB1, miR-429: EGFR, PDGFB, CXCR4, MET, MAP3K10, ZEB2, EGF, TGFB1, miR-<br>203: TNF, KRAS, IL1B, ZEB2, HGF, KIT, ADRA2B, TGFB1, SYK, miR-20a*: EGFR, ERCC6, TNF, KRAS, RIPK1, MET, IL1B,<br>THBS1, TGFB1 |  | res                    |
|                        | 203                                    | “positive regulation of<br>MAPKKK cascade”                               | -   | GO: 0090080, HIF1A, F3, IL1B, NOS3, IL1A                                                                                                                                                                                                                                                                                                                                                                                                           |  | res                    |
|                        | 200c, 203                              | “regulation of JNK cascade”                                              | -   | GO: 0007254, miR-200c: AKT1, MAP3K10, ZEB2, PAK1, PDCD4, TP73,<br>miR-203: AKT1, TNF, IL1B, ZEB2, TLR4, SYK                                                                                                                                                                                                                                                                                                                                        |  | inv                    |
|                        | 203, 200c                              | “regulation of stress-<br>activated protein kinase<br>signaling pathway” | -   | GO: 007030, miR-203: TNF, IL1B, TLR4, TGFB2, miR-200c: AKT1, MAP3K10, ZEB2, PAK1, PDCD4, TP73, TGFB2                                                                                                                                                                                                                                                                                                                                               |  | inv                    |
|                        | 25                                     | TRAF6                                                                    | p   | -                                                                                                                                                                                                                                                                                                                                                                                                                                                  |  | inv                    |
|                        | 106b                                   | TRAF4                                                                    | p   | -                                                                                                                                                                                                                                                                                                                                                                                                                                                  |  | inv                    |
|                        | 106b                                   | MAP3K8                                                                   | p   | -                                                                                                                                                                                                                                                                                                                                                                                                                                                  |  | inv                    |
| PI3K/Akt               | 130a                                   | “regulation of protein kinase<br>B signaling cascade”                    | -   | GO: 0051896, F3, TSC2, PTEN, TGFB1                                                                                                                                                                                                                                                                                                                                                                                                                 |  | inv                    |
|                        | 130a                                   | “protein kinase B<br>signaling cascade”                                  |     | GO: 0043491, AKT1, TSC2, PIK3CA, RPS6KB1                                                                                                                                                                                                                                                                                                                                                                                                           |  | tox                    |
|                        | 106b, 130a,<br>93*, 20a*               | AKT1                                                                     | v   | -                                                                                                                                                                                                                                                                                                                                                                                                                                                  |  | tox                    |
|                        | 25                                     | AKT2                                                                     | v   | -                                                                                                                                                                                                                                                                                                                                                                                                                                                  |  | tox                    |
| Ras<br>signaling       | 326                                    | “Ras protein signal<br>transduction”                                     | -   | GO: 0007265, RHOJ, MAPKAPK2, ARHGEF11, NRAS, PLCE1, KRAS, CDC42EP1, SOS1, PTH, COL1A2, RHOA, CDC42EP4,<br>RHOG, CDC42EP5                                                                                                                                                                                                                                                                                                                           |  | res                    |
|                        | 25                                     | SESN3                                                                    | p   | -                                                                                                                                                                                                                                                                                                                                                                                                                                                  |  | tox                    |
|                        | 130a, 93*                              | SESN2                                                                    | p   | -                                                                                                                                                                                                                                                                                                                                                                                                                                                  |  | tox                    |

Table S1. *Cont.*

| Mechanism                              | MiR(s)                            | Target(s)/GO Terms                                                                     | p/v | Enriched Targets in the Corresponding GO Terms                                                                                                                                                                                                                                                                                                                                                                                                                 | Function<br>(Citation) |
|----------------------------------------|-----------------------------------|----------------------------------------------------------------------------------------|-----|----------------------------------------------------------------------------------------------------------------------------------------------------------------------------------------------------------------------------------------------------------------------------------------------------------------------------------------------------------------------------------------------------------------------------------------------------------------|------------------------|
| HSP modulation                         | 106b                              | HSPA6, HSPA8                                                                           | p   | -                                                                                                                                                                                                                                                                                                                                                                                                                                                              | tox                    |
|                                        | 489                               | HSPA9                                                                                  | p   | -                                                                                                                                                                                                                                                                                                                                                                                                                                                              | tox                    |
|                                        | 664                               | HSPA1B                                                                                 | p   | -                                                                                                                                                                                                                                                                                                                                                                                                                                                              | tox                    |
|                                        | 326                               | HSPA2, HSPA6, HSPB7,<br>HSP27, HSPB8                                                   | p   | -                                                                                                                                                                                                                                                                                                                                                                                                                                                              | tox                    |
|                                        | 141, 200a                         | HSPA4L                                                                                 | p   | -                                                                                                                                                                                                                                                                                                                                                                                                                                                              | tox                    |
|                                        | 203                               | HSPA14                                                                                 | p   | -                                                                                                                                                                                                                                                                                                                                                                                                                                                              | tox                    |
| (Mitochondrial)<br>apoptosis promotion | 25, 200c,<br>200b, 20a*           | BCL2                                                                                   | v   |                                                                                                                                                                                                                                                                                                                                                                                                                                                                | tox                    |
|                                        | 200c, 203                         | BAX                                                                                    | v   |                                                                                                                                                                                                                                                                                                                                                                                                                                                                | res                    |
|                                        | 200c, 20a*,<br>106b               | “activation of pro-apoptotic<br>gene products”                                         | -   | GO: 0008633, miR-106b: AKT1, BCL2, PPP3R1, MYC, BCL2L11, miR-200c: AKT1, BCL2, FAS, MYC, miR-20a*:<br>AKT1, RIPK1, BCL2, MYC, BCL2L11                                                                                                                                                                                                                                                                                                                          | res                    |
|                                        | 106b, 200c,<br>203, 200b,<br>20a* | “release of cytochrome c<br>from mitochondria”<br>“apoptotic<br>mitochondrial changes” | -   | GO: 0001836, miR-106b: BBC3, JUN, BCL2, TP53, MYC, TP73, miR-200c: BCL2, BAX, TP53, MYC, TP73,<br>miR-200b: JUN, BCL2, TP53, MYC, miR-203: CASP3, JUN, BAX, TP53<br>GO: 0008637, miR-106b: AKT1, BBC3, JUN, BCL2, TP53, MYC, TP73, miR-200c: AKT1, BCL2, BAX, TP53, MYC,<br>TP73, miR-200a: AKT1, SH3GLB1, JUN, TP53, MYC, miR-200b: AKT1, JUN, BCL2, TP53, MYC, miR-203: AKT1,<br>CASP3, CDKN2A, JUN, BAX, TP53, miR-20a*: AKT1, CDKN2A, JUN, BCL2, TP53, MYC | [66,68,80]<br>res      |
|                                        | 664, 203                          | CASP3                                                                                  | p   | -                                                                                                                                                                                                                                                                                                                                                                                                                                                              | res                    |
|                                        | 590-5p                            | CASP8                                                                                  | p   | -                                                                                                                                                                                                                                                                                                                                                                                                                                                              | res                    |
|                                        | 203                               | DIABLO                                                                                 | p   | -                                                                                                                                                                                                                                                                                                                                                                                                                                                              | res                    |
| NO synthase inhibition                 | 200c, 20a*                        | “regulation of nitric-oxide<br>synthase activity”                                      | -   | GO: 0050999, miR-200c: EGFR, AKT1, HIF1A, KRAS, miR-20a*: EGFR, AKT1, HIF1A, KRAS                                                                                                                                                                                                                                                                                                                                                                              | inv                    |
|                                        | 203, 20a*                         | “positive regulation of nitric<br>oxide biosynthetic process”                          | -   | GO: 0045429, miR-203: AKT1, TNF, IFNG, IL1B, miR-20a*: EGFR, AKT1, TNF, IFNG, KLRK1, IL1B, JAK2                                                                                                                                                                                                                                                                                                                                                                | tox                    |
|                                        | 203, 20a*                         | NOS2A                                                                                  | v   | -                                                                                                                                                                                                                                                                                                                                                                                                                                                              | tox                    |
|                                        | 939, 135a, 135b                   | NOS2A                                                                                  | p   | -                                                                                                                                                                                                                                                                                                                                                                                                                                                              | tox                    |
|                                        | 130a                              | NOS3                                                                                   | v   | -                                                                                                                                                                                                                                                                                                                                                                                                                                                              | tox                    |

Table S1. *Cont.*

| Mechanism                              | MiR(s)                              | Target(s)/GO Terms                      | p/v | Enriched Targets in the Corresponding GO Terms                                                                                                                                  | Function (Citation)  |
|----------------------------------------|-------------------------------------|-----------------------------------------|-----|---------------------------------------------------------------------------------------------------------------------------------------------------------------------------------|----------------------|
| NADPH oxidases                         | 25                                  | NOX4                                    | v   | -                                                                                                                                                                               | tox<br>[47,69–71,78] |
|                                        | 93*                                 | NOX4                                    | p   |                                                                                                                                                                                 |                      |
|                                        | 200a, 141                           | NOX1                                    | p   |                                                                                                                                                                                 |                      |
| Sirtuin proteins                       | 130a                                | SIRT7, SIRT6                            | p   | -                                                                                                                                                                               | tox                  |
|                                        | 200a, 200b, 200c, 429 and 135a, 93* | SIRT1                                   | v   | -                                                                                                                                                                               | res<br>[47,56]       |
|                                        | 20a*                                | HMOX1                                   | p   | -                                                                                                                                                                               | tox                  |
| Disruption of heme degradation pathway | 25                                  | HMOX2                                   | p   | -                                                                                                                                                                               | tox<br>[73,75–77]    |
|                                        | 141, 200a                           | BACH1                                   | p   | -                                                                                                                                                                               | res                  |
| G1/S cycle inhibition                  | 25, 106b                            | “G1 phase of mitotic cell cycle”        | -   | GO:0000080, miR-25: E2F1, CDKN1C, CDC6, CDK6, CDK2, miR-106b: E2F1, CDKN1C, CDC23, CDK2                                                                                         | tox                  |
|                                        | 200a, 200b, 200c                    | “G1/S transition of mitotic cell cycle” | -   | GO:0000082, miR-200c: EGFR, AKT1, CDKN1A, CCND1, CDKN1B, CCND2, BCL2, miR-200a: EGFR, AKT1, CCND1, CDKN1B, CCND2, CDKN3, miR-200b: EGFR, AKT1, CCND1, CDKN1B, CCND2, BCL2, SKP2 | tox                  |
|                                        | 141, 200c, 200a                     | LOX                                     | v   | -                                                                                                                                                                               | tox                  |
| Modulating arachidonic acid cascade    | 664                                 | LOX                                     | p   | -                                                                                                                                                                               | tox<br>[88]          |
|                                        | 93*                                 | MGST1                                   | -v  | -                                                                                                                                                                               | tox<br>[29]          |

Explanations: *potentially conflicting results*; **tox**: associated with PDT phototoxicity; **res**: associated with PDT insensitivity; **inv**: involvement; **p**: predicted target; **v**: validated target.
