# Supplementary material for: MicroRNAs Associated with the Efficacy of Photodynamic Therapy in Biliary Tract Cancer Cell Lines
Source: MDPI journal article supplement (doi:10.3390/ijms151120134), 2014-11-05
Supplement: s1 [file s1]

Archive with 7 entries (7 files):
- ijms-58226_Revision_Suppl 01 expression.xlsx
- ijms-58226_Revision_Suppl 02 correlations.xlsx
- ijms-58226_Revision_Suppl 03 correlation plots.pdf
- ijms-58226_Revision_Suppl 04 targets.xlsx
- ijms-58226_Revision_Suppl 05 number targets per miRNA.xlsx
- ijms-58226_Revision_Suppl 06 target analysis.pdf
- ijms-58226_Revision_Suppl 07 uptake-corrected phototoxicity.xlsx
