# Supplementary material for: MicroRNAs Associated with the Efficacy of Photodynamic Therapy in Biliary Tract Cancer Cell Lines
Source: MDPI journal article supplement (doi:10.3390/ijms151120134), 2014-11-05
Supplement: s1 [file s1 › ijms-58226_Revision_Suppl 01 expression.xlsx]

## Sheet: Supplement 01
	expression per cell line (2-DCT)
miRNA	BDC	CCSW	EGI	GBC	MzChA1	MzChA2	SkChA1	TFK
hsa-miR-141			0.00466579	0.00296377	0.00268199	0.00002693	0.00743291	0.00731906
hsa-miR-135b	0.00220468	0.00005692	0.03658351	0.01507132	0.01162402	0.00395493	0.06747839	0.00942740
hsa-miR-135a	0.00002754		0.00024244	0.00006650	0.00007289	0.00017252	0.00041070	0.00011683
hsa-miR-200c	0.00054638	0.00179791	0.39470248	0.24110776	0.20562602	0.00147071	0.43241580	0.26875714
hsa-miR-1226#			0.00004043		0.00001002	0.00001841	0.00017023
hsa-miR-205			0.01645691	0.00011395			0.03256229	0.00004598
hsa-miR-623		0.00000199	0.00003612	0.00006781		0.00001861	0.13195565	0.00001635
hsa-miR-25	0.00372481	0.00388502	0.00267460	0.00387779	0.00155530	0.00325356	0.00149910	0.00173683
hsa-miR-429	0.00651546	0.00424076	0.02020474	0.01241777	0.01226299	0.00271571	0.03370475	0.00321175
hsa-miR-190	0.00004617	0.00003896		0.00005257	0.00001235	0.00004489
hsa-miR-326	0.00001703		0.00005525		0.00003122	0.00004038	0.00010202	0.00000672
hsa-miR-203		0.00205270	0.00130190	0.01567653	0.00528478		0.03909147	0.00173695
hsa-let-7g#					0.00001321	0.00002571	0.00005268	0.00001209
hsa-miR-1248			0.00000776		0.00000657		0.00002224	0.00003661
hsa-miR-516-3p	0.00010792	0.00011399	0.00004004	0.00010774	0.00001649	0.00014499	0.00001525	0.00008127
hsa-miR-200a	0.00537129	0.00400672	0.01471098	0.01102674	0.01192978	0.00258848	0.01800261	0.00541087
hsa-miR-330	0.00013919	0.00010918	0.00030656	0.00009625	0.00010497	0.00012400	0.00049106	0.00005000
hsa-miR-664	0.00310149	0.00288578	0.00140004	0.00228829	0.00073170	0.00238001	0.00122152	0.00129079
hsa-miR-200b	0.04370928	0.02988857	0.12858885	0.11181999	0.10360724	0.02003632	0.16205356	0.04280654
hsa-miR-223	0.00009026	0.00003021	0.42974790	0.00009969	0.69883181	0.70461612	0.98682494	0.37124024
hsa-miR-590-5p	0.00173456	0.00087814	0.00243264	0.00194914	0.00115508	0.00199337	0.00302600	0.00159235
hsa-miR-200c#			0.00012972		0.00005008		0.00010970	0.00021823
rno-miR-29c#	0.00013242	0.00023314	0.00008238	0.00014142	0.00002981	0.00002666		0.00005537
hsa-miR-425-5p	0.00684366	0.00391801	0.00502395	0.00570740	0.00372762	0.00501652	0.01251095	0.00357355
hsa-miR-181a	0.00770432	0.01924513	0.00763814	0.00773625	0.00276164	0.00565361	0.00081783	0.00825152
hsa-miR-939	0.01253299	0.01323750	0.00949897	0.00990645	0.00355446	0.00918594	0.00637069	0.00326891
hsa-miR-28-3p	0.00597346	0.01255615	0.00788615	0.00627682	0.00449118	0.01044924	0.00420659	0.00684884
hsa-miR-22#	0.00110111	0.00116454	0.00062467	0.00027943	0.00012442	0.00063021	0.00028142
hsa-miR-106b	0.01316894	0.01475899	0.00962190	0.00968354	0.00583546	0.01279843	0.00902241	0.00627128
hsa-miR-34a#		0.00034214	0.00043848	0.00055320	0.00028963	0.00087034	0.00096476	0.00081971
hsa-miR-301	0.00159402	0.00280835	0.00472339	0.00196555	0.00103467	0.00133156	0.00622825	0.00066983
hsa-miR-135b#	0.00042313		0.00104245	0.00070313	0.00019470	0.00006067	0.00085301	0.00040444
hsa-miR-503			0.00007404		0.00001769		0.00003941	0.00001738
hsa-miR-95	0.00013086	0.00055356	0.00006553	0.00045324	0.00024415	0.00049470	0.00008838	0.00034006
hsa-miR-146a	0.00061744	0.00949535	0.04324681	0.00029782	0.00105089	0.00144275	0.03723635	0.00002482
hsa-miR-1253	0.00009127	0.00007397	0.00002232	0.00008704	0.00001175			0.00003434
hsa-miR-888	0.00233653	0.00138984	0.00012779	0.00076728		0.00001490	0.00002319
hsa-miR-33a#		0.00005507	0.00014533		0.00010409	0.00014808	0.00015607	0.00027941
hsa-miR-301b	0.00035013	0.00025986	0.00029819	0.00022880	0.00012549	0.00012892	0.00072128	0.00005163
hsa-miR-130a	0.00007039	0.00233484	0.00003197	0.00026516	0.00002893	0.00202849	0.00000805	0.00009151
hsa-miR-1180	0.00030044	0.00057449	0.00018454	0.00078109	0.00009096	0.00032706	0.00013741	0.00018954
hsa-miR-532-3p	0.00185185	0.00044508	0.00067433	0.00015852	0.00044296	0.00125676	0.00339290	0.00022549
hsa-miR-213	0.00102127	0.00222508	0.00052813	0.00039386	0.00015481	0.00039757	0.00012453	0.00077573
hsa-miR-572	0.00008555	0.00008269		0.00009154	0.00001951		0.00001471
hsa-miR-144#			0.00274950	0.00003505	0.00154500	0.00358515	0.00303268	0.00187309
hsa-miR-28	0.00215079	0.00477441	0.00222071	0.00261323	0.00117981	0.00203870	0.00151438	0.00222416
hsa-miR-30d#	0.00392681	0.00326449	0.00025098	0.00089817	0.00011014	0.00003066	0.00040059
mmu-miR-96	0.00025370	0.00014941	0.00002794	0.00025812	0.00001237	0.00001188	0.00001501	0.00003284
hsa-miR-520D-3P	0.00008500	0.00006265	0.00002510	0.00004833	0.00000677			0.00004298
hsa-miR-20a#	0.00021082	0.00019311	0.00036851	0.00009735	0.00009127	0.00032997	0.00037607	0.00035579
hsa-miR-101	0.00029328	0.00011769	0.00021275		0.00003733	0.00014073	0.00037334	0.00016758
hsa-miR-455-3p		0.00085401	0.00006102	0.00139169	0.00021236	0.00102584	0.00003289	0.00009243
hsa-miR-598	0.00008482	0.00083146	0.00020478			0.00013783	0.00150099
hsa-miR-191	0.10832839	0.06139383	0.07356878	0.04229849	0.03997203	0.06052196	0.14476646	0.04902546
hsa-miR-19a	0.06682276	0.02294681	0.07373725	0.04176534	0.01711192	0.07603109	0.10760119	0.03528931
hsa-miR-29b	0.00063744	0.00022789	0.00212303	0.00053482	0.00032642	0.00030376	0.00107379	0.00206302
hsa-miR-518b		0.00006169		0.00007837	0.00002283	0.00002156
hsa-miR-19b	0.51284094	0.25653676	0.43849658	0.28990457	0.12780575	0.55564354	0.83542884	0.28077278
hsa-miR-1233	0.02364330	0.01568441	0.00286348	0.01488789	0.00082869	0.00105677	0.00138792	0.01034806
hsa-miR-23b	0.00141242	0.00235173	0.00025791	0.00158133	0.00022566	0.00009159	0.00049938	0.00036250
hsa-miR-186	0.01258007	0.00714543	0.01535484	0.00638742	0.00669583	0.01985344	0.02588191	0.00612394
hsa-miR-551b#	0.00003635	0.00006291	0.00000333	0.00004854			0.00000815	0.00001564
hsa-miR-1305	0.00015073	0.00005880	0.51104155	0.00030784	0.78573076	0.53570208	0.74930362
mmu-miR-93	0.04019844	0.04456446	0.02850063	0.03160836	0.01635988	0.02726434	0.02727206	0.01085479
hsa-miR-22	0.00333542	0.01019381	0.00311002	0.00289113	0.00179546	0.00503195	0.00286342	0.00281388
hsa-miR-361-3p	0.00043893	0.00059835	0.00028179	0.00016127	0.00005223	0.00026187	0.00019977	0.00018659
hsa-miR-580	0.00018306	0.00009561		0.00006691	0.00002025	0.00000408	0.00001318	0.00003688
hsa-miR-539	0.00022614	0.00007012		0.00013571	0.00004025	0.00001729		0.00006597
hsa-miR-489	0.00017606	0.00014524	0.00002891	0.00022964	0.00002733	0.00063591	0.00001854	0.00002658
hsa-miR-455		0.00083487		0.00073029	0.00032940	0.00170296	0.00002409	0.00030262
hsa-miR-671-3p	0.00061067	0.00036194	0.00022089	0.00079149	0.00007071			0.00017166
hsa-miR-24-2#	0.00030650	0.00017685	0.00024380	0.00017242	0.00012029		0.00036825	0.00014859
hsa-miR-570		0.00001320	0.00002844			0.00001443	0.00002073	0.00002105
hsa-miR-190b	0.00009958	0.00005753		0.00009059	0.00000211	0.00001004	0.00001037	0.00003445
hsa-miR-17	0.37040702	0.15586161	0.36350258	0.17672156	0.09706379	0.35883722	0.57669092	0.12874381
mmu-miR-140	0.03383085	0.00976230	0.00459614	0.00394803	0.00154160	0.01505307	0.00332853	0.00326970
hsa-miR-518f	0.10667421	0.06421426		0.16713085	0.00000728		0.00001174
hsa-miR-484	0.03989034	0.05551947	0.04068773	0.02829812	0.02235253	0.05749928	0.02923375	0.04183270
hsa-miR-454#	0.00006715	0.00003959	0.00007827	0.00008049	0.00002320	0.00003558	0.00009549	0.00004283
hsa-miR-875-5p	0.00059339	0.00023285	0.00003562	0.00038678	0.00001282	0.00000904	0.00002410	0.00013897
hsa-miR-660	0.00385296	0.00187491	0.00221395	0.00075667	0.00064227	0.00307319	0.00665255	0.00054637
hsa-miR-650	0.00083576	0.00044210	0.00005758	0.00062471	0.00001058	0.00025698	0.00007387	0.00055714
hsa-miR-331-5p	0.00043569	0.00038754	0.00021241	0.00068683	0.00005192	0.00016115	0.00015195	0.00008914
hsa-miR-523	0.00010072	0.00002603		0.00004309	0.00000527	0.00000249	0.00000329
hsa-miR-25#	0.00010112	0.00005189	0.00002307	0.00014597	0.00001009	0.00004694	0.00001772	0.00004561
hsa-miR-18b	0.00317348	0.00084658	0.00213084	0.00206742	0.00046737	0.00176952	0.00481015	0.00030021
hsa-miR-32		0.00003622	0.00005560	0.00005328	0.00001459	0.00001281	0.00005603	0.00002522
hsa-miR-181a-2#	0.00053710	0.00183434	0.00048006	0.00017043	0.00017314	0.00052696	0.00017196	0.00074537
hsa-miR-487b	0.00003600	0.00002889	0.00002996	0.00009208	0.00002331	0.00001163
hsa-miR-302c		0.00008112	0.00000979	0.00007342	0.00000194
hsa-miR-149#	0.02103120	0.01100326	0.00073117	0.01477379	0.00002735	0.00005906	0.00010648	0.01065897
hsa-miR-106a	0.38208972	0.15431364	0.30796483	0.17340892	0.09253564	0.36118309	0.56500597	0.13127599
hsa-miR-1225-3P	0.00164337	0.00052513	0.00013479	0.00046280		0.00021143	0.00013098	0.00017260
hsa-miR-494	0.00201680	0.00167949	0.00089194	0.00210415	0.00064107	0.00059608	0.00090933	0.00079386
hsa-miR-181c	0.00013000	0.00049710	0.00017727	0.00015441	0.00008494	0.00011220	0.00007501	0.00020823
hsa-miR-708	0.00026370	0.00190135		0.00010594	0.00025853	0.00000449	0.00010254	0.00000526
hsa-miR-410	0.00004911	0.00004227		0.00007409	0.00001011		0.00001027	0.00000954
hsa-miR-586	0.00006833	0.00002715	0.00001619	0.00005352			0.00000749
hsa-miR-222	0.53030099	0.47762078	0.67419484	0.32552720	0.36832615	0.06836727	0.82229967	0.13887656
hsa-miR-365	0.00838417	0.00766307	0.00290658	0.00407312	0.00142603	0.00214436	0.01241117	0.00624958
hsa-miR-20a	0.11341500	0.06414753	0.12061970	0.06531010	0.03039009	0.11931864	0.16209585	0.06317839
hsa-miR-221	0.03836364	0.01285290	0.02871279	0.01084482	0.00411161	0.00121458	0.04775172	0.00168899
hsa-miR-202	0.00010546	0.00003679	0.00004588	0.00012174	0.00001446	0.00001414		0.00005087
mmu-miR-134		0.00020371		0.00019998	0.00004763			0.00004558
mmu-miR-374-5p	0.02875155	0.01220180	0.00956405	0.00524970	0.00349497	0.01900691	0.00819060	0.00738634
hsa-miR-381	0.00035603	0.00015038	0.00002035	0.00056044		0.00000595		0.00004424
hsa-miR-208b		0.00010865	0.00005010		0.00000640	0.00002577
hsa-miR-184	0.00025649	0.00016864	0.00004402		0.00016268	0.00002653	0.00003809	0.00003131
hsa-miR-501	0.00082215	0.00050843	0.00079582		0.00024887	0.00061292	0.00139315
hsa-miR-616	0.00010836	0.00003835			0.00002488			0.00001491
hsa-miR-769-5p	0.00082551	0.00061500	0.00068533	0.00032295	0.00017124	0.00042790	0.00104725	0.00044874
hsa-miR-218		0.00255323	0.00013802	0.00004930	0.00005146	0.00008309	0.00002665	0.00002963
hsa-miR-30a-5p	0.00954509	0.02178645	0.01173928	0.01036801	0.01401321	0.00202497	0.02236748	0.01329572
hsa-miR-18a	0.00355800	0.00123364	0.00348443	0.00210531	0.00051083	0.00295294	0.00505960	0.00085096
hsa-miR-1255B	0.00012082	0.00024671		0.00040823	0.00006669	0.00003701	0.00005345	0.00005058
hsa-let-7f-1#	0.00038108	0.12729741	0.00001938				0.00007717	0.00006061
U6 snRNA	0.25764979	0.22928875	0.28293401	0.23388156	0.25062660	0.20380103	0.25130470	0.26162549
hsa-miR-532	0.00412149	0.00283613	0.00093169	0.00039437	0.00113355	0.00372017	0.00774487	0.00072626
hsa-miR-342-3p	0.00003113	0.00962857	0.00002485	0.00071283	0.00022631	0.00084308	0.00038893	0.00086248
RNU48	0.25764979	0.22928875	0.28293401	0.23388156	0.25401332	0.20411148	0.25134928	0.26162549
hsa-miR-151-3p	0.00840565	0.00973823	0.01827845	0.00973761	0.00743922	0.00495992	0.01311606	0.00818566
hsa-miR-34b	0.00021233	0.00018236	0.00005555	0.00009649	0.00003278	0.00002475	0.00002873	0.00017439
hsa-miR-363	0.00039020	0.00007482		0.00005497	0.00003684	0.00007977	0.00049771	0.00002259
hsa-miR-323-3p	0.00043939	0.00022348	0.00012872	0.00075662	0.00009793	0.00008111	0.00005544	0.00014168
hsa-miR-92a-1#	0.00018395	0.00007186	0.00003825	0.00016800	0.00002060	0.00007225	0.00006503
hsa-miR-16	0.12520667	0.12473494	0.11520199	0.09006747	0.10020578	0.07234231	0.13837765	0.10846301
hsa-miR-128a	0.00050693	0.00045339	0.00043393	0.00061333	0.00018299	0.00034597	0.00033933	0.00019274
hsa-miR-574-3p	0.01450389	0.02046975	0.02470826	0.00678540	0.00676187	0.01051396	0.03119904	0.00366766
hsa-miR-1275	0.00520450	0.00280881	0.00166298	0.00723788	0.00109660	0.00281518	0.00130641	0.00409492
hsa-miR-886-5p	0.00334677	0.00067433	0.01487607			0.01198400	0.01254669	0.00070552
hsa-miR-409-3p	0.00005373	0.00018050	0.00001589	0.00040426	0.00007124	0.00000796		0.00002009
hsa-miR-15b	0.01266406	0.02110806	0.01517287	0.01901985	0.01165978	0.00637135	0.02398613	0.01362004
hsa-miR-200a#	0.00033276	0.00022662	0.00122448	0.00097770	0.00051065	0.00020408	0.00074877	0.00043213
hsa-miR-195	0.00095143	0.00126991	0.00089628	0.00065132	0.00109942	0.00067025	0.00143741	0.00075994
hsa-miR-183#	0.00139403	0.00107249	0.00110433	0.00073727	0.00053890	0.00035856	0.00157636	0.00077414
hsa-miR-452	0.00093392	0.00047725	0.00060732	0.00006337	0.00043173	0.00024512	0.00078489	0.00082763
hsa-miR-27b	0.01034217	0.00861602	0.00394171	0.00442640	0.00155866	0.00081230	0.00331803	0.00390727
hsa-miR-106b#	0.00173202	0.00141261	0.00087380	0.00174638		0.00042141	0.00074922	0.00044726
hsa-miR-24	0.44980866	0.48704855	0.42629898	0.40397838	0.26515105	0.05607401	0.67731375	0.21649041
hsa-miR-200b#	0.00008757	0.00005639	0.00003033	0.00017303		0.00000813		0.00005485
hsa-miR-34a	0.00192368	0.00461561	0.00189123	0.00482970	0.00167100	0.00307957	0.00576920	0.00457686
hsa-miR-638	0.00051604	0.00015783	0.00003791	0.00016523	0.00001203	0.00003885	0.00005014	0.00014525
hsa-miR-1274B	0.55339250	0.36454656	0.34550716	0.23403291	0.14060256	0.48065731	0.29850453	0.25615395
hsa-miR-140-3p	0.00180696	0.00042718	0.00043060	0.00008605	0.00021707	0.00260121	0.00031775	0.00051540
hsa-miR-486	0.01611986	0.00187959	0.00059342	0.00021811	0.00017088	0.00006034	0.01728977	0.00016144
hsa-let-7a	0.00849237	0.00674829	0.00392807	0.00823595	0.00240334	0.00011396	0.00310546	0.00281427
hsa-miR-30c	0.14847411	0.15271752	0.10744256	0.06341861	0.05606733	0.03574533	0.20382332	0.07337208
hsa-miR-296	0.00056725	0.00236727		0.00023780	0.00004524	0.00086447	0.00074671	0.00000658
hsa-let-7b	0.04059887	0.04119284	0.01774108	0.03641433	0.00972918		0.01250670	0.03042234
hsa-miR-26b#	0.00007431	0.00013239	0.00015577	0.00015911	0.00005602	0.00007863	0.00006492
mmu-miR-129-3p		0.00007556			0.00001176	0.00006061		0.00005503
hsa-miR-423-5p	0.00106531	0.00023990	0.00031772	0.00050988	0.00016394	0.00026443	0.00023194	0.00019553
hsa-miR-376c		0.00039429	0.00005994	0.00080700	0.00026348	0.00001949		0.00002397
hsa-miR-182#	0.00430424	0.00105516	0.00017861	0.00442712	0.00024146	0.00025074	0.00048637	0.00116425
hsa-let-7f-2#		0.00001160			0.00000940		0.00001111	0.00003770
hsa-miR-520f	0.00002153	0.00000607	0.00000438			0.00000518		0.00000971
hsa-miR-197	0.00668380	0.00326260	0.00581799	0.00362815	0.00357656	0.00951409	0.01037331	0.00262890
hsa-miR-182	0.00167211	0.00112828	0.00026200	0.00047580	0.00037415	0.00018985	0.00059192	0.00037549
hsa-miR-618	0.00009451	0.00003760	0.00004433	0.00017465	0.00000788	0.00001120	0.00000973	0.00002455
hsa-miR-655		0.00002446	0.00000677	0.00007603	0.00001494	0.00001243
hsa-miR-212	0.00013223	0.00011759	0.00023344	0.00054068	0.00012631	0.00014801	0.00034456	0.00027345
hsa-miR-19a#	0.00019477			0.00022557		0.00002964	0.00001270
hsa-miR-411		0.00010618	0.00007950	0.00010083	0.00005088	0.00001020	0.00001253	0.00001015
hsa-miR-26a-1#	0.00031000	0.00032067	0.00007535	0.00039220	0.00001464	0.00003565	0.00016846	0.00006725
hsa-miR-142-3p			0.00006394		0.00001312	0.00001565	0.00001342	0.00003307
hsa-miR-23a#		0.00002276			0.00000120	0.00000523	0.00002293	0.00008130
hsa-miR-584	0.00105063		0.00064545	0.00019903	0.00010374	0.00002742	0.00090020
hsa-let-7e	0.03256539	0.03246294	0.03294578	0.03725170	0.00933610	0.00148944	0.01227815	0.01461988
hsa-miR-509-5p	0.00002960	0.00003365	0.00001940	0.00004681		0.00003507	0.00002569	0.00001504
hsa-miR-518e		0.00004085	0.00002592	0.00005611			0.00000307
hsa-miR-340#	0.00019161	0.00038256	0.00003864	0.00017560	0.00003801	0.00008511	0.00017479	0.00006858
hsa-miR-550	0.00040925	0.00016020	0.00007564	0.00052365	0.00009136	0.00006164	0.00011043	0.00013430
hsa-miR-449	0.00019624	0.00003114	0.00008318	0.00009985	0.00001579	0.00015403	0.00006425	0.00002810
hsa-miR-193b	0.01661561	0.02235804	0.02412107	0.01373452	0.00616136	0.01543743	0.02353021	0.05881284
hsa-miR-1267	0.00006367	0.00001366		0.00005393		0.00000560	0.00000609	0.00002768
hsa-miR-1260	0.00937072	0.00289319	0.00296899	0.00788422	0.00221125	0.00469594	0.00266509	0.00632857
hsa-miR-941		0.00011668	0.00026184	0.00052325	0.00008849	0.00015238	0.00026546	0.00044264
hsa-miR-564	0.00035440	0.00000859	0.00008747	0.00038578	0.00002278	0.00001139	0.00001889
hsa-miR-194	0.00232683	0.00089591	0.00022446	0.00538607	0.00524689	0.00668594	0.00049828	0.00371963
hsa-miR-139-5p	0.00027234	0.00115968	0.00003145	0.00198637	0.00000993	0.00000973	0.00002845	0.00081161
hsa-miR-324-5p	0.00038941	0.00041605	0.00103938	0.00017325	0.00013516	0.00034940	0.00071258	0.00013397
hsa-miR-519e	0.00008012	0.00002464	0.00005645			0.00028001	0.00001455
hsa-miR-107	0.00023092		0.00011881		0.00005616	0.00003860	0.00019185
hsa-miR-549	0.00009986	0.00002391		0.00003595	0.00001657	0.00000367	0.00001906	0.00000840
hsa-miR-629		0.00020348	0.00044208	0.00042076	0.00027135	0.00007013	0.00021490	0.00102561
hsa-miR-224	0.00732774	0.00765033	0.00084805	0.00089022	0.00236537	0.00062000	0.00286491	0.00307537
hsa-miR-1301	0.00036530			0.00064455	0.00000603	0.00002177
hsa-miR-659	0.00074384	0.00016937	0.00010350	0.00074762	0.00001244	0.00004354	0.00004146	0.00041117
hsa-miR-505	0.00053195	0.00015883	0.00005441			0.00009913	0.00010523
hsa-miR-27a#	0.00136080	0.00178010	0.00230565	0.00149710	0.00081469	0.00030485	0.00176702	0.00170203
hsa-miR-339-5p	0.00376687	0.00341272	0.00139090	0.00327872	0.00213906	0.00141714	0.00244954	0.00232424
hsa-miR-1238	0.00071349	0.00036376	0.00005303		0.00000403	0.00001149	0.00005396	0.00034124
hsa-miR-148a		0.00118659	0.00011937	0.00027081	0.00005142	0.00499671	0.00031624	0.00006322
hsa-miR-487a	0.00153535	0.00102970	0.00071505	0.00190916	0.00024923	0.00042975	0.00085006
hsa-miR-29b-1#	0.00013439	0.00021725	0.00008266			0.00001555	0.00003367	0.00012096
hsa-miR-422a	0.00078147	0.00030675	0.00068559	0.00089449	0.00127268	0.00004489	0.00086649	0.00044512
hsa-miR-9#		0.00011370	0.00005542	0.00062346	0.00014508	0.00052661	0.00005907	0.00011121
mmu-let-7d#	0.00010507		0.00011321	0.00015514			0.00013629
hsa-miR-192#	0.00033762	0.00004542	0.00006113	0.00019046	0.00027846	0.00030570	0.00002648	0.00033535
hsa-miR-625	0.00119182	0.00010696	0.00096294	0.00070673	0.00009483	0.00015977	0.00104939	0.00017907
hsa-miR-628-5p	0.00038938	0.00006373	0.00041441	0.00028936	0.00023506	0.00027389	0.00008867	0.00013393
hsa-miR-324-3p	0.00082959	0.00077923	0.00093941	0.00050847	0.00018562	0.00047343	0.00049364	0.00025206
hsa-miR-885-5p	0.00024119	0.00011733	0.00011869	0.00023440	0.00001246	0.00322824	0.00002350	0.00004401
hsa-miR-27a	0.01365320	0.01083646	0.00964327	0.00929165	0.00608625	0.00152371	0.01489740	0.00601206
hsa-miR-31	0.49126839	0.00733462	0.01950838	0.12558621	0.01311373	0.00001105	0.43184578	0.00286207
hsa-miR-372	0.00004307	0.00001355				0.00016612	0.00001700
hsa-miR-573	0.00022956	0.00004948		0.00007594	0.00002429	0.00000548	0.00003071	0.00007273
hsa-miR-938	0.02417191	0.00915563	0.00253217	0.01355514	0.00368694	0.00585097	0.00812512	0.01050468
hsa-miR-20b	0.01662022	0.00174487	0.00052709	0.00143987	0.00104798	0.00160840	0.01491180	0.00027122
hsa-miR-194#	0.00068116			0.00184544	0.00014441	0.00018992		0.00021547
hsa-miR-520c-3p	0.00004448	0.00011879	0.00002070	0.00008778	0.00000503	0.00206759	0.00002498	0.00001734
mmu-miR-379	0.00007369	0.00016581	0.00006821	0.00084232	0.00003591	0.00005405		0.00007213
hsa-miR-1285	0.00029120	0.00009056	0.00002698	0.00003247	0.00000822	0.00002715	0.00002144	0.00015794
hsa-miR-493	0.00014571				0.00000090	0.00000193		0.00001355
hsa-miR-196b	0.00111247	0.00127750	0.00352255	0.00133814	0.00047769	0.00064699	0.00188549	0.00074065
hsa-miR-758		0.00003965	0.00007257	0.00010235	0.00001265	0.00004170		0.00003682
hsa-miR-320B	0.00308605	0.00046405	0.00024942	0.00234172	0.00013374	0.00039515	0.00082930	0.00032333
hsa-miR-450a			0.00005608		0.00000962	0.00002273	0.00001871
hsa-miR-520d-5p	0.00003344		0.00003492		0.00000143	0.00006431		0.00001897
hsa-miR-215	0.00014490	0.00013147	0.00009668	0.00148837	0.00203702	0.00877075	0.00004606	0.00120519
hsa-miR-424#	0.00088851		0.00000972			0.00024614	0.00009501	0.00009133
hsa-miR-933	0.00010877		0.00004147	0.00020029	0.00001104		0.00015522
hsa-miR-454	0.01568667	0.01983287	0.01618765	0.00936406	0.00756888	0.01302252	0.01405514	0.00712337
hsa-let-7b#	0.00012511		0.00000589		0.00000246			0.00001757
hsa-miR-582-3p	0.00016468	0.00004030		0.00024893	0.00000816	0.00001800	0.00003211	0.00009027
hsa-miR-502	0.00005662			0.00007350		0.00001929	0.00001657
hsa-miR-522	0.00105181	0.00002677	0.00031170	0.00017089	0.00003331	0.04384469	0.00020720
hsa-miR-519a	0.00075517	0.00008341	0.00054424	0.00010475		0.15360411	0.00000651
hsa-miR-587	0.00010704	0.00003764				0.00049578	0.00002267
hsa-miR-517c			0.00003647	0.00013669	0.00000900	0.08688146	0.00001188
hsa-miR-1276	0.00005118			0.00002798	0.00001251			0.00002660
hsa-miR-596	0.02407993	0.01935936	0.00000637	0.02262848	0.08044031	0.00524052	0.00178983	0.00002260
hsa-miR-579	0.00005572		0.00009877	0.00029673	0.00006563	0.00011280	0.00011675	0.00026504
hsa-miR-485-3p	0.00008756	0.00003272	0.00001673	0.00028830	0.00003773	0.00002975	0.00002529	0.00004347
hsa-miR-331	0.02338591	0.05543103	0.02385173	0.03956449	0.03016452	0.04346251	0.04068361	0.01894125
hsa-miR-720	0.20987104	0.09621296	0.16704254	0.23923217	0.11083132	0.32586172	0.15987060	0.11677678
hsa-miR-630		0.00004231		0.00016078	0.00001186		0.00000502	0.00001138
hsa-miR-378	0.00559819	0.00303177	0.00345688	0.01305443	0.01514836		0.00900260	0.00514759
hsa-miR-192	0.00588673	0.00170731	0.00048351	0.01456803	0.01605700	0.02252315	0.00093756	0.01602174
hsa-miR-193a-3p	0.00010533	0.00017517	0.00002530	0.00008951	0.00003988	0.00003838	0.00020343	0.00005228
hsa-miR-155	0.00105079	0.00068773	0.00251389	0.00087839	0.00051539	0.00150635	0.00169944	0.00017826
hsa-miR-210	0.01368921	0.00739178	0.01056208	0.00590294	0.00209664	0.00141817	0.00479967	0.00309633
hsa-miR-1227	0.00062666	0.00021472	0.00014233	0.00001311	0.00001155	0.00004402	0.00017248
hsa-miR-582-5p	0.00053372	0.00001011	0.00015124	0.00009364	0.00001196	0.00009629	0.00002051	0.00022335
hsa-miR-576-3p	0.00003116	0.00002467	0.00006446	0.00012324	0.00003306	0.00002393	0.00004341	0.00015941
hsa-miR-375		0.00007078	0.00048559	0.00723270	0.00210059	0.00247310	0.00011654	0.00043917
U6 snRNACardB	0.30335416	0.24006134	0.24784112	0.26701327	0.23024105	0.19987940	0.21446138	0.28035597
hsa-miR-518d		0.00008961	0.00003772	0.00010195	0.00000634		0.00003048
hsa-let-7f	0.00313848	0.00205113	0.00214566	0.00269472	0.00047482		0.00141142	0.00081845
hsa-miR-125a-5p		0.00981183	0.01452355	0.00387967	0.00395245	0.00692573		0.00753632
hsa-miR-206		0.00000497	0.00000727		0.00000881	0.00000294		0.00005842
hsa-miR-521			0.00008732		0.00001329	0.00097984	0.00003390
hsa-miR-26a-2#		0.00002625				0.00002372	0.00002128	0.00004294
hsa-miR-601	0.00014824			0.00011440		0.00001018		0.00211070
hsa-miR-340	0.00104215	0.00171918	0.00023268	0.00026432	0.00016564	0.00031772	0.00094201	0.00015173
hsa-miR-766	0.00341825	0.00128206	0.00139646	0.00109079	0.00038835	0.00051985	0.00125813	0.00056736
hsa-miR-222#	0.00839051	0.00282952	0.00558273	0.00190669	0.00051638	0.00039885	0.00673107	0.00067105
hsa-miR-204		0.00004325	0.00003797		0.00001779	0.00039418	0.00003197	0.00003317
hsa-miR-627	0.03520888			0.24361080	0.00001307	0.00001350		0.00001309
hsa-miR-500	0.00075789	0.00010134	0.00014483	0.00022116	0.00009252	0.00039501	0.00068043	0.00008374
hsa-miR-656		0.00003638		0.00017976		0.00000667	0.00000291	0.00003350
hsa-miR-21	0.18990941	0.24637666	0.16680535	0.12875943	0.08727816	0.10051987	0.19828371	0.33005423
hsa-miR-30c-2#	0.00042702	0.00035001	0.00027795		0.00002980		0.00014441	0.00013443
hsa-miR-9	0.00031390	0.00023848	0.00003841	0.00489644	0.00090976	0.00177519	0.00040510	0.00088158
hsa-let-7c	0.00020341	0.00006592	0.00003639	0.00006940	0.00004331		0.00002502	0.00014788
hsa-miR-99b		0.01671790	0.03200048	0.00814342	0.00942796	0.01245305		0.00901020
hsa-miR-16-1#	0.00023893		0.00008489	0.00035455	0.00004704	0.00006249	0.00005983	0.00009192
hsa-miR-589	0.00062775	0.00013700		0.00085043	0.00011173	0.00017902		0.00854939
hsa-miR-29a#	0.00010539	0.00020869	0.00017468	0.00022288	0.00002122	0.00003792	0.00010935	0.00007666
hsa-miR-625#	0.01088643	0.00049017	0.00721386	0.00399548	0.00091963	0.00111365	0.00697849	0.00138500
hsa-miR-1254	0.00018175	0.00041090	0.00026999	0.00027121	0.00007149	0.00008068	0.00010396	0.00041752
RNU44	0.08910653	0.14574063	0.39603847	0.14503604	0.07599921	0.08524437		0.10804348
hsa-miR-483-5p		0.00006316	0.00002208	0.00015058	0.00005659	0.01094823	0.00088804	0.00003421
hsa-miR-542-3p	0.00005390	0.00001144			0.00000052	0.00001105	0.00001717
hsa-miR-15a#		0.00017471	0.00014307	0.00022573	0.00007104	0.00017921	0.00012144
hsa-miR-1274A	0.07632899	0.02691166	0.08055888	0.10664464	0.02949465	0.12398250	0.05744805	0.04175998
hsa-miR-934	0.00024201	0.00011855		0.00013834		0.00101174	0.00027667
hsa-miR-642	0.00007201	0.00000755	0.00007189	0.00005813	0.00002293	0.00003241	0.00001787	0.00002992
hsa-miR-483-3p	0.00059200	0.00035327		0.00125359	0.00015493	0.01588871	0.00204144	0.00004541
hsa-miR-361	0.00044269	0.00041340	0.00021398	0.00007500	0.00003508	0.00019258	0.00028786	0.00015289
hsa-miR-31#	0.05834185	0.00148386	0.00183169	0.02297778	0.00108494		0.04339862	0.00044151
RNU48CardB	0.30335416	0.24006134	0.24784112	0.26701327	0.23047115	0.20167768	0.22106196	0.28035823
mmu-miR-187		0.00009626	0.00001402			0.00003389	0.00003780
hsa-miR-30a-3p	0.10105237	0.08881671	0.06930424	0.02207693	0.01860369	0.00166170	0.09109482	0.05077296
hsa-miR-629CardB			0.00001350	0.00004957	0.00002227	0.00001051	0.00001584	0.00002201
hsa-miR-545#	0.00006770		0.00001508		0.00000276	0.00001118	0.00001210
hsa-miR-376a		0.00003152		0.00035696	0.00012338		0.00001005
hsa-miR-1271	0.00102254			0.00013411	0.00000573	0.00012415	0.00020945	0.00006256
hsa-miR-183	0.00207321	0.00191311	0.00105061	0.00090773	0.00084624	0.00039669	0.00219682	0.00077317
hsa-miR-1282				0.00009990	0.00004974	0.00001051	0.00004896
hsa-miR-505#	0.00013970	0.00011587	0.00004194			0.00005494	0.00014838	0.00005219
hsa-miR-1247		0.00011226	0.00005863	0.00691135	0.00273993	0.00028253	0.00003901
hsa-miR-126#	0.00036045	0.00067486	0.00016310	0.00039324	0.00010074	0.00018899	0.00039729	0.00034239
hsa-miR-345	0.01462604	0.00528360	0.01440424	0.00910548	0.00642175	0.00165458	0.01049990	0.00443969
hsa-miR-26a	0.02668889	0.03019467	0.02920254	0.00951256	0.00605964	0.01173518	0.02992257	0.01476551
hsa-miR-15b#	0.00138200	0.00360715	0.00295298	0.00343252	0.00114213	0.00207706	0.00338126	0.00213443
hsa-miR-424	0.00011960		0.00073221	0.02812993	0.00033617	0.00011368		0.00002238
mmu-miR-495		0.00003093		0.00050847	0.00002136	0.00002501	0.00002195	0.00002395
hsa-miR-597	0.00004925	0.00008514	0.00017796	0.00006059	0.00002298	0.00001919	0.00008311	0.00002469
hsa-miR-328	0.00344802	0.00050847	0.00021793	0.00034311	0.00011361	0.00010034	0.00098072	0.00002617
hsa-miR-1208	0.00025081	0.00044030	0.00029263	0.00102645	0.00011745	0.00013392	0.00021443	0.00053138
hsa-miR-589CardB				0.00014805	0.00002161	0.00002617	0.00001146
hsa-miR-191#	0.00016165		0.00009731		0.00000626	0.00002801	0.00009208
hsa-miR-1296	0.00328788	0.00020390	0.00054407		0.00010415	0.00033277	0.00058858	0.00062777
hsa-miR-146b	0.00056014	0.00102749	0.00101005	0.00152365	0.00178741	0.00135630	0.00138372	0.00073875
hsa-miR-10a#	0.00030512		0.00015101		0.00000161		0.00003455
hsa-let-7g	0.01289793	0.00857848	0.00776412	0.00689110	0.00311797	0.00028982	0.01012162	0.00641593
hsa-miR-130b#	0.00368729	0.00013381	0.00136129	0.00163860	0.00047975	0.00082513	0.00123263	0.00015260
hsa-miR-1303	0.00011438	0.00005826	0.00007208		0.00002435	0.00002954	0.00005349
hsa-miR-663B	0.00201833	0.01149998	0.00882546	0.01007402	0.00093325	0.00029510	0.00080067	0.01349377
mmu-miR-491	0.00087701	0.00046938	0.00119708	0.00076172	0.00013438	0.00001472	0.00068380	0.00036373
hsa-miR-103	0.00409956	0.00828224	0.00712812	0.00568332	0.00262086	0.00341704	0.00578420	0.00103094
hsa-miR-339-3p	0.00296405	0.00177611	0.00107865	0.00244703	0.00139858	0.00128834	0.00204345	0.00163519
hsa-miR-125a-3p		0.00006412	0.00017894	0.00005954	0.00001985	0.00003771		0.00002135
hsa-miR-98	0.00058803	0.00026442	0.00021343	0.00025563	0.00008542	0.00001179	0.00047651	0.00004980
hsa-miR-449b	0.00009159	0.00003635	0.00006315	0.00011057	0.00001270	0.00007573	0.00006753	0.00003514
hsa-miR-550CardB	0.00128152	0.00054437		0.00109328		0.00015964		0.00218105
hsa-miR-130b	0.00226148	0.00093415	0.00125790	0.00161881	0.00071468	0.00127525	0.00156039	0.00035630
hsa-miR-27b#	0.00230867	0.00175426	0.00161079	0.00084526	0.00044617	0.00030700	0.00069812	0.00251098
hsa-miR-211	0.00005167	0.00001022			0.00001264		0.00001710
hsa-miR-502-3p	0.00010042	0.00003594			0.00002305	0.00006260	0.00008396	0.00003105
hsa-miR-138	0.05313415	0.00037598	0.00003226	0.00004997	0.00001269	0.00418180	0.02946688	0.00210842
hsa-miR-151-5P	0.00421683	0.00354764	0.00228829	0.00216936	0.00160335	0.00116971	0.00264142	0.00304183
hsa-miR-942	0.00054550	0.00003946	0.00026666	0.00013376	0.00009842	0.00023031	0.00022278
hsa-miR-378CardB		0.00004439	0.00001925	0.00033971	0.00007321		0.00004616
hsa-miR-29c	0.00207638	0.00064480	0.00071194	0.00066736	0.00031593	0.00028992	0.00084090	0.00062679
hsa-miR-26b	0.00672096	0.00854998	0.00698288	0.01107807	0.00437759	0.00425474	0.00704574	0.00621933
hsa-miR-744#		0.00005107	0.00006503		0.00002243	0.00003378	0.00001920
hsa-miR-148b	0.00021074	0.00035099	0.00019744	0.00046585	0.00021248	0.00026525	0.00043612	0.00012796
hsa-miR-1183		0.00005905	0.00000752	0.00018832	0.00000606	0.00003390	0.00002121	0.00010825
hsa-miR-127		0.00002760			0.00001492	0.00002191	0.00001709
hsa-miR-500CardB		0.00012845	0.00006644		0.00005800	0.00007990	0.00006359	0.00013332
hsa-miR-23a	0.00208604	0.00404075	0.00124610	0.00147236	0.00100069	0.00015818	0.00256468	0.00018442
hsa-miR-335	0.00090029	0.00005075	0.00049866	0.00088954	0.00022093	0.00054552	0.00072758	0.00022018
hsa-miR-1201	0.00017670	0.00017220	0.00032594	0.00022694	0.00025493	0.00195042	0.00034933	0.00068376
hsa-miR-193b#	0.00039160	0.00010665	0.00016626		0.00005493	0.00008010	0.00008689	0.00063953
hsa-miR-132	0.00220911	0.00261266	0.00185771	0.00538906	0.00154985	0.00194696	0.00271086	0.00196572
hsa-miR-149	0.01273095	0.00739998	0.00564675	0.00929487	0.00623670	0.00152934	0.00854094	0.00996147
hsa-miR-148b#		0.00016062	0.00007300	0.00019741	0.00004192	0.00008594	0.00011468	0.00017341
hsa-miR-362	0.00187770	0.00025750	0.00047104	0.00028856	0.00017814	0.00065926	0.00121819	0.00014491
hsa-miR-15a	0.00218475	0.00200628	0.00175628	0.00107843	0.00107317	0.00102570	0.00199831	0.00123410
hsa-miR-338-3p		0.00004089		0.00027838	0.00007052	0.00002355	0.00001323	0.00039710
hsa-miR-185	0.00094768	0.00053013	0.00090697	0.00160774	0.00058051	0.00071155	0.00098679	0.00069542
hsa-miR-744	0.00098977	0.00104494	0.00269862	0.00196351	0.00047038	0.00158547	0.00113233	0.00044583
hsa-miR-1290	0.00119736	0.00275654	0.00153185	0.00394977	0.00236309	0.00357860	0.00313798	0.00076990
hsa-miR-338-5P	0.00015618	0.00005040		0.00009939	0.00005092	0.00000703	0.00002841	0.00037369
hsa-miR-150			0.00010290		0.00001106	0.00003261		0.00002267
hsa-miR-100#		0.00006084	0.00017736			0.00000805		0.00009728
hsa-miR-545	0.00014315	0.00007588			0.00000295	0.00006905	0.00008443	0.00005650
hsa-miR-19b-1#	0.00080366	0.00028830	0.00051181	0.00051848	0.00012841	0.00056267	0.00076797
hsa-miR-30b	0.06575222	0.07442017	0.04868555	0.03534745	0.02630201	0.01204618	0.06819365	0.02497061
hsa-miR-221#	0.00007584				0.00001714	0.00000507	0.00003799
hsa-miR-425#	0.00032560		0.00016567	0.00023989	0.00002126		0.00018885
hsa-miR-335#	0.00091058	0.00006904	0.00046722	0.00082632	0.00010245	0.00036985	0.00045154	0.00026049
hsa-miR-29a	0.20738498	0.12205789	0.11707764	0.07833767	0.03574491	0.03018199	0.10866384	0.09769815
hsa-miR-125b	0.00178927	0.00290275	0.01376680	0.00006994	0.00015047	0.00034139	0.00071746	0.00305561
rno-miR-7#	0.00254358	0.00158355	0.00234173	0.00211179	0.00166829	0.00086694	0.00182809	0.00167590
hsa-miR-320	0.05116792	0.02071095	0.01716647	0.03591051	0.01056197	0.01905161	0.04191425	0.01205750
hsa-miR-21#	0.00030863	0.00026821	0.00050034	0.00078674	0.00011501	0.00017253	0.00023174	0.00080243
hsa-miR-362-3p	0.00013037	0.00002814	0.00002830		0.00001092	0.00006921	0.00006592	0.00002430
hsa-miR-199a-3p				0.00005921	0.00000657	0.00004886	0.00003405
hsa-miR-590-3P	0.00100303	0.00024688	0.00044682	0.00145616	0.00028640	0.00053080	0.00066237	0.00059461
hsa-miR-374	0.00315637	0.00228030	0.00210092	0.00052505	0.00081698	0.00312917	0.00258551	0.00147117
hsa-miR-296-3p		0.00006590			0.00000809	0.00001245	0.00004441
hsa-miR-92a	0.01793701	0.00620410	0.00696644	0.01069626	0.00289400	0.00853410	0.01119068	0.00677565
hsa-miR-1244				0.00007869		0.00001374	0.00000921	0.00002158
hsa-miR-636	0.00027249	0.00014238	0.00025302	0.00013546	0.00003270	0.00006579	0.00013621	0.00013817
hsa-miR-193a-5p	0.00215631	0.00362711	0.00020959	0.00019001	0.00040823	0.00032014	0.00249522	0.00036871
hsa-miR-100	0.00863782	0.00973797	0.05659183	0.00105734	0.00056611	0.00064998	0.00205696	0.00894424
hsa-miR-152	0.00010120	0.00047248	0.00069937	0.00057206	0.00024527	0.00023830	0.00041878	0.00006286
hsa-miR-652	0.00350829	0.00025383	0.00080364	0.00132385	0.00156401	0.00092637	0.00150601	0.00079938
hsa-miR-571	0.00019462	0.00009388	0.00003919			0.00001273	0.00007360	0.00011671
hsa-miR-628-3p				0.00007305	0.00001133	0.00001019		0.00004491
hsa-let-7d	0.00681998	0.00350210	0.00368106	0.00618269	0.00139458	0.00001410	0.00434696	0.00177284
hsa-miR-99a	0.00992982	0.01032322	0.05275448	0.00180504	0.00076443	0.00064535	0.00289081	0.00838238
hsa-miR-643	0.00024604				0.00002454	0.00002672	0.00004714	0.00013133
hsa-miR-548d-5p	0.00005860	0.00002411	0.00000678	0.00006036	0.00000832		0.00005121
hsa-miR-486-3p	0.00654488	0.00102956	0.00010337		0.00001567	0.00001003	0.00334477
hsa-miR-10a	0.04915845	0.00544760	0.04126143	0.00397054	0.00087500		0.01384495	0.00234430
hsa-miR-605		0.00001254			0.00000800	0.00003730	0.00000817	0.00002857
hsa-miR-18a#	0.00029579	0.00009558	0.00016314	0.00011414	0.00003783	0.00022280	0.00024303	0.00001898
hsa-miR-30e-3p	0.05902521	0.07215159	0.04177801	0.01461287	0.01325620	0.00224009	0.05143223	0.03292942
hsa-miR-10b	0.01330565	0.00050702	0.01112260	0.00006279	0.00002604		0.00323482	0.00003709
hsa-let-7i#		0.00003816		0.00010443	0.00000740		0.00001160	0.00011552
hsa-miR-99b#		0.00011343	0.00062554	0.00024422	0.00009415	0.00009271	0.00001228	0.00021166
hsa-miR-551a			0.00003539	0.00017143	0.00001146		0.00002760
hsa-miR-17#		0.00005414	0.00003454	0.00013066	0.00000578	0.00000921	0.00002325	0.00011450
hsa-miR-1300	0.00006739	0.00006580	0.00007390	0.00005472	0.00000354	0.00002990	0.00004822	0.00008231
hsa-miR-126	0.00053561	0.02579146	0.00576580	0.00801073	0.00492626	0.01045150	0.01615481	0.00861027
RNU44CardB	0.11374565	0.17564538	0.11167185	0.18507090	0.09385226	0.12987580	0.11780649	0.28665255
hsa-miR-577		0.00004148	0.00059102	0.00061782	0.00006527		0.00007353	0.00006627
hsa-miR-346		0.00005635		0.00006181	0.00003516	0.00002854	0.00005440
hsa-miR-10b#		0.00000917	0.00015891	0.00009527	0.00000467	0.00001038		0.00003382
hsa-miR-886-3p	0.00444803	0.00203612	0.00697320			0.00613071	0.00325478	0.00140042
hsa-miR-639		0.00000645		0.00011858	0.00000684	0.00000514	0.00001870	0.00004235
hsa-miR-661	0.00008339	0.00027094	0.00015690	0.00087053	0.00011495	0.00021015	0.00022672	0.00055497
hsa-miR-30d	0.00371422	0.00979713	0.00433993	0.00731099	0.00707561	0.00138824	0.00737716	0.00241908
hsa-miR-450b-5p	0.00006394		0.00001716		0.00000930	0.00002594	0.00002980
hsa-miR-657	0.00004170			0.00008268	0.00001176			0.00010478
hsa-miR-622		0.00004400			0.90722827	0.00001651	0.00004071	0.00002754
