# Supplementary material for: MicroRNAs Associated with the Efficacy of Photodynamic Therapy in Biliary Tract Cancer Cell Lines
Source: MDPI journal article supplement (doi:10.3390/ijms151120134), 2014-11-05
Supplement: s1 [file s1 › ijms-58226_Revision_Suppl 02 correlations.xlsx]

## Sheet: Supplement 02
correlation analysis													n cell lines with no miRNA expression
miRNA	mTHPC (current)				porfimer sodium (current)				mTHPC (2010, Ref. #13)
	viability (0.588 µM, 650 mJ/cm2, relative to initial value)		uptake-corrected phototoxicity ((0.588 µM, 650 mJ/cm2, relative to initial value) / rel FI)		viability (2 µM, 4300 mJ/cm2, relative to initial value)		uptake-corrected phototoxicity ((1.2 µg/ml, 4300 mJ/cm2, relative to initial value) / rel FI)		viability (0.588 µM, 650 mJ/cm2, relative to untreated control)		uptake-corrected phototoxicity ((0.588 µM, 650 mJ/cm2, relative to untreated control) / rel FI)
	(a)	(b)	(a)	(b)	(a)	(b)	(a)	(b)	(a)	(b)	(a)	(b)
hsa_let_7a_000377	-0.341	0.408	0.253	0.546	-0.395	0.333	0.26	0.533	-0.231	0.582	0.413	0.309	0
hsa_let_7d_002283	-0.068	0.873	0.172	0.684	-0.048	0.91	-0.006	0.99	0.047	0.912	0.285	0.494	0		(a) Pearson's correlation coefficient
hsa_let_7e_002406	-0.392	0.337	0.073	0.863	-0.359	0.383	0.135	0.75	-0.192	0.648	0.318	0.443	0
hsa_let_7g_002282	0.178	0.674	-0.232	0.58	0.158	0.708	-0.386	0.345	0.296	0.477	-0.185	0.661	0		-1	negative correlation
hsa_miR_100_000437	-0.119	0.778	-0.379	0.355	0.055	0.898	-0.318	0.443	0.13	0.759	-0.166	0.694	0		-0.8
hsa_miR_103_000439	-0.354	0.389	-0.363	0.377	-0.149	0.726	-0.318	0.443	-0.232	0.581	-0.047	0.912	0		-0.6
hsa_miR_106a_002169	0.288	0.489	-0.445	0.269	0.478	0.231	-0.631	0.094	0.248	0.554	-0.388	0.342	0		-0.4
hsa_miR_106b_000442	-0.71	0.048	-0.332	0.422	-0.611	0.107	0.046	0.914	-0.726	0.042	0.041	0.923	0		-0.2
hsa_miR_1180_002847	-0.593	0.121	0.225	0.592	-0.574	0.136	0.466	0.245	-0.595	0.119	0.459	0.253	0		0	no correlation
hsa_miR_1201_002781	-0.185	0.66	-0.181	0.667	-0.111	0.794	0.113	0.791	-0.342	0.407	-0.128	0.762	0		0.2	positive correlation
hsa_miR_1208_002880	-0.131	0.758	0.284	0.496	-0.168	0.69	0.337	0.414	-0.079	0.852	0.328	0.428	0		0.4
hsa_miR_1233_002768	-0.391	0.338	0.151	0.722	-0.533	0.174	0.349	0.397	-0.342	0.407	0.284	0.495	0		0.6
hsa_miR_1254_002818	-0.115	0.786	-0.345	0.403	-0.209	0.619	-0.042	0.922	0	1	-0.265	0.526	0		0.8
hsa_miR_125b_000449	-0.09	0.832	-0.429	0.289	0.074	0.861	-0.349	0.397	0.155	0.715	-0.229	0.585	0		1
hsa_miR_126_002228	-0.018	0.965	-0.584	0.128	0.021	0.96	-0.419	0.301	-0.091	0.831	-0.512	0.195	0
hsa_miR_1260_002896	-0.24	0.566	0.365	0.374	-0.35	0.396	0.49	0.218	-0.242	0.563	0.416	0.305	0		(b) significance (p-value, two-tailed)
hsa_miR_126x_000451	-0.126	0.766	-0.384	0.348	-0.185	0.66	-0.201	0.633	-0.149	0.725	-0.28	0.502	0
hsa_miR_1274A_002883	-0.392	0.337	0.154	0.716	-0.204	0.628	0.283	0.497	-0.418	0.303	0.375	0.361	0			p<0.01
hsa_miR_1274B_002884	-0.48	0.229	-0.355	0.388	-0.4	0.326	-0.033	0.938	-0.492	0.216	-0.069	0.87	0			p<0.05
hsa_miR_1275_002840	-0.339	0.412	0.421	0.299	-0.425	0.294	0.572	0.138	-0.335	0.417	0.51	0.197	0
hsa_miR_1285_002822	-0.12	0.777	-0.028	0.947	-0.295	0.478	0.139	0.742	-0.094	0.824	-0.006	0.989	0
hsa_miR_128a_002216	-0.562	0.147	0.109	0.797	-0.428	0.291	0.212	0.615	-0.47	0.239	0.441	0.274	0
hsa_miR_1290_002863	-0.228	0.586	0.201	0.633	-0.086	0.839	0.155	0.713	-0.361	0.38	0.295	0.478	0
hsa_miR_1300_002902	0.018	0.966	-0.533	0.173	0.022	0.959	-0.322	0.436	0.165	0.696	-0.401	0.325	0
hsa_miR_130a_000454	-0.619	0.101	-0.343	0.405	-0.577	0.134	0.128	0.762	-0.727	0.041	-0.099	0.816	0
hsa_miR_130b_000456	-0.258	0.537	0.142	0.737	-0.135	0.75	0.033	0.938	-0.234	0.577	0.343	0.405	0
hsa_miR_130bx_002114	-0.194	0.644	0.262	0.531	-0.157	0.71	0.15	0.724	-0.13	0.759	0.394	0.334	0
hsa_miR_132_000457	-0.146	0.729	0.351	0.394	-0.105	0.805	0.277	0.506	-0.148	0.726	0.427	0.291	0
hsa_miR_135b_002261	0.706	0.051	-0.351	0.393	0.885	0.003	-0.796	0.018	0.744	0.034	-0.47	0.24	0
hsa_miR_138_002284	0.155	0.714	-0.045	0.915	0.124	0.77	-0.209	0.619	0.129	0.761	-0.058	0.891	0
hsa_miR_139_5p_002289	-0.267	0.523	0.265	0.526	-0.345	0.402	0.405	0.319	-0.251	0.549	0.332	0.421	0
hsa_miR_140_3p_002234	-0.435	0.281	-0.102	0.81	-0.397	0.33	0.219	0.602	-0.549	0.159	0.062	0.883	0
hsa_miR_146a_000468	0.357	0.385	-0.584	0.129	0.601	0.115	-0.817	0.013	0.498	0.209	-0.505	0.202	0
hsa_miR_146b_001097	0.091	0.83	0.468	0.242	0.161	0.703	0.19	0.652	-0.005	0.991	0.352	0.393	0
hsa_miR_148b_000471	-0.004	0.992	0.053	0.9	0.119	0.778	-0.122	0.773	-0.073	0.863	0.124	0.771	0
hsa_miR_149_002255	0.275	0.509	0.158	0.709	0.102	0.809	-0.019	0.965	0.339	0.412	0.037	0.931	0
hsa_miR_149x_002164	-0.317	0.444	0.241	0.565	-0.478	0.231	0.406	0.318	-0.279	0.503	0.327	0.43	0
hsa_miR_151_3p_002254	0.231	0.582	-0.401	0.324	0.433	0.284	-0.61	0.109	0.455	0.258	-0.287	0.49	0
hsa_miR_151_5P_002642	0.003	0.995	-0.276	0.508	-0.124	0.771	-0.199	0.636	0.08	0.85	-0.227	0.589	0
hsa_miR_152_000475	-0.196	0.642	-0.144	0.735	0.054	0.899	-0.224	0.593	-0.04	0.925	0.093	0.826	0
hsa_miR_155_002623	-0.059	0.889	-0.392	0.337	0.252	0.547	-0.476	0.233	0.06	0.888	-0.155	0.715	0
hsa_miR_15a_000389	0.046	0.914	-0.527	0.179	0.096	0.821	-0.571	0.139	0.141	0.74	-0.391	0.339	0
hsa_miR_15b_000390	0.366	0.373	-0.306	0.461	0.415	0.307	-0.553	0.155	0.418	0.302	-0.331	0.423	0
hsa_miR_15bx_002173	0.01	0.981	-0.473	0.237	0.178	0.673	-0.443	0.271	0.063	0.882	-0.311	0.454	0
hsa_miR_16_000391	0.442	0.273	-0.469	0.241	0.427	0.291	-0.701	0.053	0.533	0.174	-0.524	0.183	0
hsa_miR_17_002308	0.291	0.484	-0.473	0.237	0.505	0.201	-0.669	0.07	0.277	0.506	-0.4	0.326	0
hsa_miR_181a_000480	-0.598	0.117	-0.301	0.469	-0.65	0.081	0.153	0.718	-0.53	0.177	-0.045	0.916	0
hsa_miR_181a_2x_002317	-0.421	0.299	-0.519	0.187	-0.485	0.224	-0.078	0.855	-0.404	0.32	-0.33	0.425	0
hsa_miR_181c_000482	-0.42	0.301	-0.418	0.303	-0.469	0.241	-0.034	0.936	-0.366	0.373	-0.223	0.595	0
hsa_miR_182_002334	-0.263	0.53	-0.019	0.964	-0.372	0.364	0.053	0.9	-0.243	0.562	0.092	0.829	0
hsa_miR_1825_002907	-0.293	0.482	0.495	0.212	-0.379	0.354	0.499	0.208	-0.266	0.524	0.577	0.134	0
hsa_miR_183_002269	0.191	0.65	-0.345	0.403	0.192	0.649	-0.52	0.186	0.22	0.6	-0.313	0.45	0
hsa_miR_183x_002270	0.354	0.389	-0.445	0.269	0.412	0.31	-0.681	0.063	0.446	0.268	-0.42	0.3	0
hsa_miR_185_002271	-0.006	0.989	0.389	0.341	0.093	0.826	0.186	0.66	0.045	0.916	0.451	0.262	0
hsa_miR_186_002285	0.308	0.458	-0.495	0.212	0.531	0.176	-0.662	0.074	0.244	0.56	-0.456	0.256	0
hsa_miR_18a_002422	0.212	0.614	-0.392	0.337	0.439	0.276	-0.591	0.123	0.23	0.584	-0.278	0.506	0
hsa_miR_18ax_002423	-0.134	0.752	-0.22	0.6	0.032	0.939	-0.261	0.532	-0.156	0.712	-0.03	0.944	0
hsa_miR_18b_002217	0.312	0.451	-0.234	0.577	0.485	0.223	-0.543	0.164	0.302	0.467	-0.195	0.644	0
hsa_miR_191_002299	0.431	0.286	-0.467	0.243	0.539	0.168	-0.728	0.04	0.417	0.304	-0.48	0.228	0
hsa_miR_192_000491	-0.141	0.739	0.517	0.189	-0.254	0.543	0.665	0.072	-0.303	0.465	0.387	0.344	0
hsa_miR_192x_002272	-0.121	0.776	0.514	0.192	-0.324	0.433	0.652	0.08	-0.219	0.602	0.377	0.357	0
hsa_miR_193a_3p_002250	0.246	0.556	-0.386	0.344	0.253	0.545	-0.522	0.184	0.178	0.674	-0.398	0.329	0
hsa_miR_193a_5p_002281	-0.027	0.949	-0.465	0.245	-0.056	0.896	-0.421	0.298	-0.063	0.883	-0.385	0.346	0
hsa_miR_193b_002367	0.463	0.248	-0.516	0.19	0.351	0.394	-0.371	0.365	0.488	0.22	-0.67	0.069	0
hsa_miR_194_000493	-0.251	0.549	0.657	0.076	-0.345	0.402	0.766	0.027	-0.41	0.313	0.567	0.143	0
hsa_miR_195_000494	0.404	0.321	-0.38	0.354	0.413	0.31	-0.653	0.079	0.389	0.341	-0.476	0.234	0
hsa_miR_196b_002215	0.047	0.912	-0.433	0.284	0.294	0.48	-0.539	0.168	0.27	0.518	-0.227	0.589	0
hsa_miR_197_000497	0.177	0.675	-0.352	0.393	0.377	0.357	-0.479	0.23	0.078	0.854	-0.295	0.479	0
hsa_miR_19a_000395	0.316	0.446	-0.455	0.258	0.538	0.169	-0.63	0.094	0.3	0.47	-0.393	0.335	0
hsa_miR_19b_000396	0.349	0.397	-0.511	0.196	0.533	0.174	-0.672	0.068	0.291	0.485	-0.477	0.232	0
hsa_miR_200a_000502	0.599	0.116	0.026	0.952	0.744	0.034	-0.511	0.196	0.695	0.056	-0.107	0.801	0
hsa_miR_200ax_001011	0.228	0.587	0.083	0.845	0.413	0.309	-0.227	0.589	0.42	0.3	0.123	0.771	0
hsa_miR_200b_002251	0.568	0.142	0.084	0.844	0.715	0.046	-0.452	0.261	0.658	0.076	-0.041	0.924	0
hsa_miR_200c_002300	0.744	0.034	-0.147	0.729	0.853	0.007	-0.577	0.135	0.848	0.008	-0.335	0.417	0
hsa_miR_20a_000580	0.236	0.574	-0.574	0.137	0.459	0.253	-0.679	0.064	0.234	0.578	-0.463	0.248	0
hsa_miR_20ax_002437	0.413	0.309	-0.821	0.012	0.549	0.159	-0.757	0.03	0.431	0.286	-0.817	0.013	0
hsa_miR_20b_001014	0.293	0.481	-0.118	0.781	0.298	0.473	-0.375	0.359	0.251	0.549	-0.161	0.703	0
hsa_miR_21_000397	0.359	0.382	-0.587	0.126	0.221	0.599	-0.433	0.284	0.397	0.33	-0.682	0.062	0
hsa_miR_210_000512	-0.306	0.462	-0.115	0.787	-0.249	0.552	-0.085	0.842	-0.115	0.786	0.133	0.754	0
hsa_miR_212_000515	0.298	0.473	0.22	0.601	0.366	0.372	-0.017	0.969	0.32	0.44	0.153	0.718	0
hsa_miR_213_000516	-0.489	0.219	-0.384	0.348	-0.572	0.139	0.022	0.959	-0.447	0.267	-0.171	0.686	0
hsa_miR_215_000518	-0.337	0.414	0.107	0.801	-0.28	0.502	0.367	0.371	-0.508	0.199	0.168	0.692	0
hsa_miR_21x_002438	0.123	0.771	0.075	0.859	0.071	0.867	0.139	0.743	0.227	0.589	0.044	0.917	0
hsa_miR_22_000398	-0.539	0.168	-0.484	0.224	-0.522	0.184	-0.062	0.884	-0.565	0.144	-0.226	0.59	0
hsa_miR_221_000524	0.326	0.43	-0.325	0.433	0.455	0.257	-0.637	0.089	0.407	0.318	-0.279	0.504	0
hsa_miR_222_002276	0.509	0.198	-0.369	0.368	0.648	0.082	-0.779	0.023	0.57	0.141	-0.405	0.319	0
hsa_miR_222x_002097	0.127	0.765	-0.287	0.49	0.229	0.586	-0.486	0.222	0.239	0.568	-0.172	0.684	0
hsa_miR_223_002295	0.512	0.194	-0.41	0.313	0.529	0.177	-0.429	0.289	0.612	0.107	-0.553	0.155	0
hsa_miR_224_002099	-0.185	0.661	-0.209	0.619	-0.341	0.409	-0.061	0.885	-0.184	0.663	-0.15	0.724	0
hsa_miR_23a_000399	-0.141	0.738	-0.309	0.456	-0.117	0.782	-0.326	0.43	-0.105	0.804	-0.165	0.696	0
hsa_miR_23b_000400	-0.467	0.243	0.015	0.973	-0.531	0.176	0.199	0.636	-0.438	0.278	0.21	0.618	0
hsa_miR_24_000402	0.332	0.422	-0.275	0.509	0.409	0.314	-0.598	0.117	0.421	0.299	-0.26	0.534	0
hsa_miR_25_000403	-0.87	0.005	0.1	0.814	-0.816	0.014	0.478	0.231	-0.834	0.01	0.477	0.232	0
hsa_miR_25x_002442	-0.444	0.27	0.455	0.258	-0.486	0.222	0.579	0.133	-0.437	0.279	0.603	0.113	0
hsa_miR_26a_000405	0.059	0.89	-0.749	0.032	0.182	0.666	-0.726	0.041	0.175	0.678	-0.565	0.144	0
hsa_miR_26a_1x_002443	-0.347	0.4	0.142	0.737	-0.363	0.377	0.192	0.649	-0.314	0.449	0.319	0.441	0
hsa_miR_26b_000407	-0.163	0.699	0.074	0.862	-0.121	0.775	0.059	0.889	-0.07	0.87	0.217	0.605	0
hsa_miR_27a_000408	0.275	0.509	-0.209	0.62	0.309	0.457	-0.497	0.21	0.369	0.368	-0.188	0.656	0
hsa_miR_27ax_002445	0.271	0.516	-0.456	0.256	0.338	0.413	-0.559	0.15	0.484	0.225	-0.396	0.332	0
hsa_miR_27b_000409	-0.326	0.43	-0.134	0.753	-0.412	0.311	0.022	0.96	-0.236	0.574	0.042	0.921	0
hsa_miR_27bx_002174	0.01	0.981	-0.315	0.447	-0.132	0.756	-0.108	0.799	0.14	0.741	-0.284	0.495	0
hsa_miR_28_000411	-0.545	0.163	-0.365	0.374	-0.556	0.153	0.043	0.919	-0.501	0.206	-0.101	0.811	0
hsa_miR_28_3p_002446	-0.689	0.059	-0.459	0.252	-0.63	0.094	0.096	0.822	-0.694	0.056	-0.143	0.736	0
hsa_miR_29a_002112	-0.046	0.914	-0.258	0.537	-0.079	0.853	-0.242	0.564	0.077	0.856	-0.135	0.75	0
hsa_miR_29ax_002447	-0.318	0.443	-0.159	0.706	-0.21	0.618	-0.069	0.871	-0.167	0.692	0.1	0.814	0
hsa_miR_29b_000413	0.493	0.215	-0.424	0.295	0.536	0.171	-0.491	0.217	0.655	0.078	-0.504	0.203	0
hsa_miR_29c_000587	-0.069	0.872	0.012	0.977	-0.121	0.775	-0.035	0.934	0.001	0.998	0.094	0.826	0
hsa_miR_301_000528	0.375	0.36	-0.554	0.154	0.61	0.109	-0.834	0.01	0.459	0.252	-0.484	0.224	0
hsa_miR_301b_002392	0.431	0.286	-0.37	0.367	0.581	0.131	-0.725	0.042	0.438	0.278	-0.373	0.363	0
hsa_miR_30a_3p_000416	0.192	0.648	-0.531	0.175	0.195	0.644	-0.603	0.113	0.298	0.474	-0.466	0.245	0
hsa_miR_30a_5p_000417	0.479	0.229	-0.376	0.358	0.44	0.276	-0.616	0.104	0.509	0.198	-0.507	0.2	0
hsa_miR_30b_000602	0.04	0.925	-0.411	0.311	0.081	0.848	-0.51	0.196	0.128	0.763	-0.289	0.487	0
hsa_miR_30c_000419	0.338	0.413	-0.538	0.169	0.39	0.34	-0.735	0.038	0.379	0.355	-0.519	0.187	0
hsa_miR_30d_000420	0.012	0.978	0.076	0.857	0.008	0.985	-0.123	0.772	0.037	0.93	0.08	0.851	0
hsa_miR_30e_3p_000422	0.049	0.908	-0.562	0.147	0.032	0.941	-0.528	0.179	0.147	0.728	-0.458	0.254	0
hsa_miR_31_002279	0.3	0.47	-0.011	0.979	0.308	0.458	-0.31	0.456	0.277	0.506	-0.057	0.894	0
hsa_miR_320_002277	0.028	0.947	0.063	0.882	0.071	0.867	-0.122	0.773	0.013	0.975	0.136	0.748	0
hsa_miR_320B_002844	-0.243	0.562	0.411	0.312	-0.284	0.495	0.35	0.395	-0.227	0.588	0.508	0.198	0
hsa_miR_323_3p_002227	-0.393	0.336	0.562	0.147	-0.43	0.288	0.578	0.133	-0.345	0.403	0.688	0.059	0
hsa_miR_324_3p_002161	-0.494	0.214	-0.4	0.326	-0.314	0.448	-0.218	0.603	-0.318	0.443	-0.015	0.971	0
hsa_miR_324_5p_000539	0.077	0.856	-0.609	0.109	0.344	0.404	-0.697	0.054	0.24	0.568	-0.403	0.322	0
hsa_miR_328_000543	-0.115	0.787	0.075	0.86	-0.169	0.689	0.015	0.971	-0.095	0.822	0.15	0.724	0
hsa_miR_330_000544	0.526	0.18	-0.474	0.235	0.741	0.036	-0.84	0.009	0.565	0.144	-0.491	0.216	0
hsa_miR_331_000545	-0.351	0.394	-0.2	0.635	-0.259	0.535	-0.047	0.912	-0.47	0.24	-0.033	0.938	0
hsa_miR_331_5p_002233	-0.521	0.185	0.319	0.441	-0.49	0.218	0.415	0.307	-0.464	0.246	0.558	0.151	0
hsa_miR_335_000546	-0.001	0.998	0.283	0.497	0.115	0.786	0.069	0.871	0.004	0.993	0.361	0.38	0
hsa_miR_335x_002185	-0.145	0.732	0.31	0.454	-0.079	0.853	0.206	0.625	-0.089	0.835	0.434	0.283	0
hsa_miR_339_3p_002184	-0.039	0.927	0.302	0.468	-0.142	0.738	0.191	0.651	-0.067	0.875	0.303	0.466	0
hsa_miR_339_5p_002257	-0.182	0.667	0.23	0.584	-0.337	0.414	0.234	0.576	-0.19	0.652	0.26	0.534	0
hsa_miR_340_002258	-0.218	0.605	-0.44	0.276	-0.229	0.585	-0.305	0.462	-0.239	0.568	-0.281	0.5	0
hsa_miR_340x_002259	-0.326	0.43	-0.277	0.506	-0.354	0.389	-0.092	0.829	-0.358	0.384	-0.104	0.807	0
hsa_miR_342_3p_002260	-0.395	0.332	-0.385	0.346	-0.436	0.28	-0.059	0.89	-0.409	0.315	-0.218	0.604	0
hsa_miR_345_002186	0.082	0.846	0.033	0.939	0.184	0.662	-0.246	0.557	0.28	0.502	0.136	0.748	0
hsa_miR_34a_000426	0.408	0.315	-0.366	0.373	0.406	0.318	-0.414	0.308	0.305	0.462	-0.47	0.24	0
hsa_miR_34b_002102	-0.236	0.574	-0.094	0.825	-0.431	0.286	0.178	0.674	-0.183	0.665	-0.029	0.946	0
hsa_miR_361_000554	-0.222	0.598	-0.566	0.144	-0.201	0.633	-0.373	0.362	-0.197	0.64	-0.358	0.385	0
hsa_miR_361_3p_002116	-0.538	0.169	-0.509	0.198	-0.52	0.186	-0.129	0.762	-0.491	0.217	-0.201	0.633	0
hsa_miR_362_001273	0.054	0.899	-0.106	0.803	0.096	0.821	-0.236	0.574	0.034	0.937	-0.044	0.918	0
hsa_miR_365_001020	0.482	0.227	-0.5	0.207	0.461	0.251	-0.669	0.07	0.442	0.273	-0.582	0.13	0
hsa_miR_374_000563	-0.166	0.695	-0.608	0.11	-0.06	0.887	-0.401	0.325	-0.214	0.61	-0.42	0.301	0
hsa_miR_422a_002297	0.387	0.344	0.623	0.099	0.328	0.428	0.091	0.829	0.455	0.258	0.405	0.32	0
hsa_miR_423_5p_002340	-0.345	0.402	0.287	0.49	-0.379	0.354	0.312	0.452	-0.29	0.486	0.44	0.275	0
hsa_miR_425_5p_001516	0.542	0.165	-0.27	0.518	0.671	0.068	-0.652	0.08	0.487	0.221	-0.349	0.397	0
hsa_miR_429_001024	0.619	0.102	-0.189	0.654	0.796	0.018	-0.69	0.058	0.674	0.067	-0.289	0.488	0
hsa_miR_449_001030	-0.447	0.267	0.11	0.796	-0.354	0.39	0.251	0.549	-0.464	0.247	0.341	0.408	0
hsa_miR_449b_001608	-0.281	0.5	0.153	0.718	-0.139	0.744	0.163	0.7	-0.267	0.522	0.364	0.376	0
hsa_miR_452_002329	0.505	0.202	-0.443	0.271	0.412	0.311	-0.561	0.148	0.56	0.149	-0.582	0.131	0
hsa_miR_454_002323	-0.433	0.284	-0.6	0.116	-0.275	0.51	-0.384	0.347	-0.354	0.389	-0.257	0.539	0
hsa_miR_454x_001996	0.314	0.449	-0.203	0.63	0.494	0.213	-0.496	0.211	0.414	0.308	-0.135	0.751	0
hsa_miR_484_001821	-0.549	0.159	-0.601	0.115	-0.496	0.212	-0.038	0.93	-0.584	0.128	-0.322	0.437	0
hsa_miR_485_3p_001277	-0.239	0.569	0.632	0.093	-0.26	0.535	0.567	0.143	-0.23	0.584	0.679	0.064	0
hsa_miR_486_001278	0.38	0.353	-0.206	0.624	0.395	0.333	-0.49	0.218	0.345	0.403	-0.267	0.523	0
hsa_miR_489_002358	-0.6	0.116	0.063	0.881	-0.513	0.194	0.421	0.299	-0.747	0.033	0.275	0.51	0
hsa_miR_494_002365	-0.435	0.281	0.267	0.522	-0.476	0.233	0.339	0.411	-0.373	0.363	0.457	0.255	0
hsa_miR_500_002428	0.162	0.702	-0.102	0.81	0.223	0.596	-0.281	0.5	0.085	0.842	-0.086	0.84	0
hsa_miR_516_3p_001149	-0.722	0.043	-0.01	0.982	-0.746	0.034	0.506	0.201	-0.801	0.017	0.247	0.556	0
hsa_miR_520c_3p_002400	-0.403	0.322	-0.104	0.806	-0.298	0.474	0.215	0.609	-0.56	0.149	0.04	0.926	0
hsa_miR_532_001518	0.348	0.398	-0.452	0.261	0.436	0.28	-0.632	0.093	0.223	0.596	-0.486	0.222	0
hsa_miR_532_3p_002355	0.464	0.246	-0.365	0.374	0.572	0.139	-0.656	0.077	0.38	0.353	-0.431	0.287	0
hsa_miR_550_002410	-0.288	0.489	0.544	0.163	-0.353	0.39	0.508	0.199	-0.258	0.537	0.627	0.096	0
hsa_miR_574_3p_002349	0.21	0.618	-0.656	0.077	0.427	0.292	-0.825	0.012	0.285	0.493	-0.522	0.185	0
hsa_miR_576_3p_002351	0.349	0.396	0.116	0.785	0.245	0.559	0.103	0.809	0.4	0.326	-0.053	0.901	0
hsa_miR_582_5p_001983	-0.154	0.716	0.099	0.816	-0.246	0.558	0.199	0.636	-0.089	0.834	0.163	0.699	0
hsa_miR_590_3P_002677	-0.068	0.873	0.464	0.247	-0.063	0.882	0.351	0.394	-0.065	0.879	0.497	0.21	0
hsa_miR_590_5p_001984	0.483	0.225	-0.31	0.455	0.708	0.049	-0.61	0.108	0.507	0.199	-0.322	0.436	0
hsa_miR_596_001550	0.452	0.261	-0.195	0.644	0.259	0.536	-0.079	0.852	0.437	0.279	-0.439	0.277	0
hsa_miR_597_001551	-0.057	0.894	-0.443	0.271	0.174	0.681	-0.501	0.206	0.174	0.681	-0.206	0.624	0
hsa_miR_618_001593	-0.375	0.36	0.51	0.197	-0.371	0.365	0.51	0.196	-0.297	0.476	0.661	0.074	0
hsa_miR_625_002431	0.182	0.666	-0.076	0.858	0.322	0.437	-0.357	0.385	0.303	0.466	0.015	0.971	0
hsa_miR_625x_002432	0.111	0.794	-0.05	0.907	0.209	0.619	-0.279	0.504	0.232	0.581	0.044	0.917	0
hsa_miR_628_5p_002433	-0.43	0.288	0.388	0.343	-0.321	0.439	0.401	0.325	-0.285	0.494	0.591	0.123	0
hsa_miR_636_002088	-0.132	0.756	-0.293	0.482	-0.057	0.894	-0.246	0.556	0.068	0.873	-0.079	0.852	0
hsa_miR_638_001582	-0.276	0.509	0.154	0.715	-0.403	0.323	0.264	0.528	-0.244	0.56	0.25	0.55	0
hsa_miR_642_001592	-0.295	0.478	0.285	0.494	-0.202	0.632	0.273	0.512	-0.121	0.776	0.474	0.236	0
hsa_miR_650_001603	-0.333	0.42	0.187	0.658	-0.49	0.218	0.434	0.283	-0.34	0.41	0.272	0.514	0
hsa_miR_652_002352	0.024	0.956	0.426	0.293	-0.054	0.9	0.209	0.62	0.018	0.967	0.379	0.355	0
hsa_miR_659_001514	-0.222	0.597	0.417	0.304	-0.338	0.413	0.473	0.236	-0.175	0.678	0.47	0.24	0
hsa_miR_660_001515	0.341	0.408	-0.478	0.231	0.49	0.218	-0.69	0.058	0.277	0.506	-0.46	0.251	0
hsa_miR_661_001606	0.041	0.923	0.273	0.513	-0.01	0.982	0.305	0.463	0.029	0.946	0.221	0.599	0
hsa_miR_663B_002857	-0.085	0.841	-0.215	0.61	-0.155	0.715	0.032	0.94	0.043	0.919	-0.155	0.714	0
hsa_miR_664_002897	-0.729	0.04	-0.072	0.866	-0.725	0.042	0.316	0.446	-0.748	0.033	0.25	0.551	0
hsa_miR_720_002895	-0.408	0.316	0.173	0.682	-0.257	0.539	0.327	0.429	-0.497	0.21	0.362	0.378	0
hsa_miR_744_002324	-0.379	0.355	-0.136	0.748	-0.089	0.835	-0.072	0.866	-0.22	0.6	0.193	0.648	0
hsa_miR_766_001986	-0.228	0.586	-0.025	0.953	-0.229	0.586	-0.029	0.946	-0.137	0.747	0.147	0.729	0
hsa_miR_769_5p_001998	0.319	0.442	-0.66	0.075	0.442	0.273	-0.791	0.02	0.359	0.383	-0.588	0.125	0
hsa_miR_875_5p_002203	-0.381	0.352	0.324	0.433	-0.492	0.215	0.421	0.299	-0.337	0.415	0.452	0.26	0
hsa_miR_885_5p_002296	-0.421	0.299	-0.076	0.858	-0.314	0.449	0.241	0.565	-0.572	0.139	0.077	0.857	0
hsa_miR_9_000583	-0.224	0.593	0.608	0.11	-0.215	0.608	0.594	0.12	-0.283	0.498	0.625	0.098	0
hsa_miR_92a_000431	-0.081	0.849	0.014	0.974	-0.059	0.89	-0.023	0.958	-0.086	0.84	0.123	0.771	0
hsa_miR_939_002182	-0.164	0.697	0.22	0.601	-0.299	0.472	0.27	0.518	-0.18	0.67	0.26	0.535	0
hsa_miR_93x_002139	-0.752	0.031	-0.171	0.685	-0.637	0.089	0.128	0.763	-0.685	0.061	0.234	0.576	0
hsa_miR_95_000433	-0.526	0.181	0.083	0.844	-0.6	0.115	0.498	0.209	-0.654	0.078	0.189	0.654	0
hsa_miR_98_000577	0.107	0.801	-0.094	0.825	0.14	0.742	-0.322	0.437	0.159	0.708	-0.026	0.952	0
hsa_miR_99a_000435	-0.128	0.763	-0.381	0.352	0.046	0.915	-0.321	0.438	0.124	0.77	-0.163	0.7	0
mmu_miR_140_001187	-0.467	0.244	0.028	0.948	-0.504	0.203	0.241	0.566	-0.485	0.223	0.218	0.604	0
mmu_miR_374_5p_001319	-0.454	0.259	-0.153	0.718	-0.447	0.266	0.113	0.791	-0.48	0.229	0.065	0.878	0
mmu_miR_491_001630	0.009	0.983	-0.172	0.684	0.153	0.718	-0.317	0.444	0.239	0.568	0.009	0.984	0
mmu_miR_93_001090	-0.625	0.098	-0.179	0.672	-0.524	0.182	0.017	0.968	-0.579	0.133	0.174	0.68	0
mmu_miR_96_000186	-0.484	0.224	0.389	0.341	-0.549	0.159	0.482	0.227	-0.437	0.279	0.566	0.144	0
rno_miR_7x_001338	0.065	0.878	0.18	0.67	0.072	0.865	-0.058	0.892	0.273	0.514	0.235	0.575	0
RNU44_001094	0.187	0.657	-0.18	0.67	0.021	0.961	0.055	0.898	0.165	0.697	-0.302	0.468	0
RNU48_001006	0.448	0.266	-0.073	0.863	0.435	0.281	-0.355	0.388	0.662	0.074	-0.18	0.669	0
RNU48_001006	-0.031	0.941	0.233	0.578	-0.198	0.638	0.258	0.537	0.089	0.834	0.22	0.601	0
U6 snRNA_001973	-0.474	0.235	0.063	0.882	-0.445	0.27	0.361	0.38	-0.682	0.062	0.184	0.663	0
U6 snRNA_001973	0.059	0.89	-0.254	0.545	0.225	0.592	-0.282	0.499	-0.084	0.843	-0.247	0.555	0
dme_miR_7_000268	-0.105	0.805	-0.147	0.728	0.089	0.834	-0.303	0.465	0.118	0.781	0.076	0.858	1
hsa_let_7b_002619	-0.245	0.558	0.047	0.911	-0.384	0.347	0.193	0.647	-0.148	0.727	0.146	0.73	1
hsa_let_7c_000379	0.002	0.995	0.146	0.729	-0.216	0.608	0.22	0.6	0.055	0.897	0.089	0.834	1
hsa_let_7f_000382	-0.269	0.519	0.085	0.841	-0.238	0.57	0.047	0.912	-0.106	0.802	0.291	0.484	1
hsa_miR_101_002253	0.465	0.246	-0.626	0.097	0.548	0.159	-0.784	0.021	0.477	0.232	-0.648	0.082	1
hsa_miR_106bx_002380	-0.443	0.272	0.046	0.913	-0.411	0.312	0.16	0.705	-0.357	0.386	0.307	0.459	1
hsa_miR_10a_000387	-0.127	0.765	-0.146	0.73	-0.034	0.936	-0.205	0.627	0.058	0.892	0.041	0.923	1
hsa_miR_10b_002218	-0.126	0.767	-0.14	0.741	-0.031	0.941	-0.198	0.639	0.053	0.901	0.042	0.921	1
hsa_miR_1183_002841	-0.055	0.896	0.28	0.501	-0.119	0.779	0.368	0.37	-0.077	0.856	0.254	0.544	1
hsa_miR_1225_3P_002766	-0.397	0.33	0.144	0.734	-0.477	0.232	0.269	0.519	-0.368	0.37	0.305	0.463	1
hsa_miR_1227_002769	-0.228	0.587	-0.11	0.795	-0.248	0.554	-0.08	0.85	-0.173	0.682	0.045	0.916	1
hsa_miR_1238_002927	-0.168	0.691	-0.151	0.721	-0.337	0.415	0.047	0.911	-0.136	0.749	-0.095	0.824	1
hsa_miR_1255B_002801	-0.394	0.335	0.418	0.302	-0.439	0.277	0.48	0.228	-0.4	0.326	0.531	0.176	1
hsa_miR_1296_002908	-0.091	0.83	0.016	0.97	-0.164	0.698	0.028	0.948	-0.053	0.9	0.074	0.862	1
hsa_miR_1305_002867	0.319	0.442	-0.311	0.453	0.557	0.151	-0.588	0.125	0.437	0.279	-0.285	0.493	1
hsa_miR_135a_000460	0.658	0.076	-0.474	0.235	0.859	0.006	-0.795	0.018	0.647	0.083	-0.576	0.135	1
hsa_miR_135bx_002159	0.43	0.287	-0.116	0.785	0.606	0.111	-0.466	0.245	0.6	0.116	-0.116	0.785	1
hsa_miR_148a_000470	-0.441	0.274	-0.195	0.644	-0.332	0.421	0.161	0.703	-0.601	0.115	-0.026	0.952	1
hsa_miR_148bx_002160	0.117	0.783	-0.17	0.687	0.098	0.817	-0.052	0.902	0.088	0.836	-0.203	0.629	1
hsa_miR_16_1x_002420	-0.198	0.638	0.596	0.119	-0.214	0.612	0.508	0.199	-0.154	0.716	0.656	0.077	1
hsa_miR_17x_002421	0.099	0.815	0.098	0.818	0.023	0.958	0.179	0.671	0.135	0.749	0.038	0.928	1
hsa_miR_184_000485	-0.298	0.474	0.173	0.683	-0.445	0.269	0.209	0.619	-0.277	0.506	0.218	0.604	1
hsa_miR_190b_002263	-0.391	0.338	0.322	0.436	-0.507	0.2	0.453	0.26	-0.378	0.356	0.444	0.27	1
hsa_miR_193bx_002366	0.297	0.475	-0.245	0.559	0.107	0.801	-0.1	0.814	0.33	0.425	-0.391	0.339	1
hsa_miR_19b_1x_002425	-0.11	0.795	-0.115	0.786	0.085	0.841	-0.247	0.555	-0.109	0.797	0.079	0.852	1
hsa_miR_202_002363	-0.388	0.342	0.465	0.246	-0.452	0.261	0.547	0.161	-0.288	0.489	0.601	0.115	1
hsa_miR_218_000521	-0.418	0.303	-0.394	0.335	-0.441	0.274	-0.083	0.846	-0.407	0.317	-0.204	0.628	1
hsa_miR_22x_002301	-0.693	0.057	-0.297	0.475	-0.627	0.096	0.028	0.948	-0.64	0.087	0.063	0.882	1
hsa_miR_24_2x_002441	0.461	0.25	-0.256	0.541	0.509	0.198	-0.613	0.106	0.569	0.141	-0.294	0.479	1
hsa_miR_26bx_002444	-0.598	0.117	0.053	0.901	-0.383	0.349	0.133	0.754	-0.452	0.26	0.412	0.311	1
hsa_miR_296_000527	-0.404	0.321	-0.456	0.257	-0.39	0.34	-0.158	0.709	-0.478	0.231	-0.253	0.546	1
hsa_miR_30dx_002305	-0.476	0.234	-0.043	0.919	-0.554	0.154	0.141	0.738	-0.439	0.276	0.161	0.703	1
hsa_miR_31x_002113	0.202	0.631	0.098	0.818	0.2	0.635	-0.174	0.68	0.187	0.657	0.078	0.854	1
hsa_miR_32_002109	0.291	0.484	-0.306	0.461	0.484	0.224	-0.509	0.197	0.402	0.323	-0.256	0.54	1
hsa_miR_338_5P_002658	0.337	0.414	0.033	0.938	0.086	0.84	0.123	0.773	0.324	0.433	-0.196	0.642	1
hsa_miR_34ax_002316	0.52	0.187	-0.414	0.308	0.611	0.108	-0.459	0.252	0.391	0.338	-0.563	0.146	1
hsa_miR_362_3p_002117	-0.076	0.859	-0.213	0.613	-0.065	0.879	-0.166	0.694	-0.127	0.765	-0.126	0.766	1
hsa_miR_363_001271	0.405	0.32	-0.201	0.633	0.429	0.288	-0.492	0.215	0.329	0.426	-0.279	0.503	1
hsa_miR_375_000564	-0.274	0.511	0.687	0.06	-0.244	0.56	0.639	0.088	-0.311	0.453	0.718	0.045	1
hsa_miR_378_002243	0.358	0.385	0.743	0.035	0.255	0.542	0.268	0.521	0.349	0.397	0.48	0.228	1
hsa_miR_409_3p_002332	-0.392	0.337	0.515	0.192	-0.415	0.306	0.542	0.165	-0.372	0.365	0.621	0.101	1
hsa_miR_455_3p_002244	-0.595	0.12	0.278	0.504	-0.54	0.167	0.54	0.167	-0.681	0.063	0.47	0.24	1
hsa_miR_483_3p_002339	-0.318	0.443	-0.105	0.804	-0.201	0.633	0.154	0.716	-0.488	0.22	0.014	0.973	1
hsa_miR_483_5p_002338	-0.319	0.442	-0.126	0.767	-0.206	0.625	0.148	0.727	-0.483	0.225	-0.008	0.985	1
hsa_miR_487a_001279	-0.402	0.324	0.292	0.483	-0.332	0.422	0.248	0.553	-0.344	0.404	0.515	0.191	1
hsa_miR_509_5p_002235	-0.477	0.233	-0.078	0.854	-0.358	0.384	0.152	0.72	-0.512	0.194	0.201	0.634	1
hsa_miR_522_002413	-0.376	0.359	-0.098	0.818	-0.271	0.516	0.205	0.627	-0.531	0.176	0.035	0.934	1
hsa_miR_549_001511	-0.232	0.58	0.331	0.423	-0.343	0.406	0.293	0.481	-0.224	0.594	0.393	0.335	1
hsa_miR_564_001531	-0.343	0.405	0.562	0.147	-0.349	0.397	0.496	0.211	-0.272	0.515	0.696	0.055	1
hsa_miR_573_001615	-0.147	0.727	0.259	0.536	-0.307	0.46	0.283	0.497	-0.134	0.752	0.275	0.509	1
hsa_miR_579_002398	0.304	0.465	0.276	0.509	0.26	0.534	0.203	0.629	0.291	0.485	0.122	0.774	1
hsa_miR_580_001621	-0.375	0.36	0.193	0.646	-0.52	0.187	0.321	0.439	-0.354	0.39	0.307	0.459	1
hsa_miR_582_3p_002399	-0.181	0.669	0.509	0.198	-0.272	0.515	0.498	0.209	-0.174	0.68	0.536	0.171	1
hsa_miR_629_001562	0.46	0.251	-0.104	0.806	0.342	0.407	-0.092	0.829	0.525	0.181	-0.317	0.444	1
hsa_miR_708_002341	-0.407	0.317	-0.278	0.506	-0.466	0.244	-0.02	0.962	-0.407	0.317	-0.118	0.78	1
hsa_miR_92a_1x_002137	-0.456	0.256	0.372	0.364	-0.428	0.29	0.388	0.342	-0.456	0.256	0.575	0.136	1
hsa_miR_941_002183	0.33	0.425	0.046	0.914	0.349	0.397	-0.027	0.949	0.361	0.379	-0.057	0.893	1
hsa_miR_942_002187	-0.214	0.61	0.07	0.87	-0.123	0.772	0.001	0.998	-0.164	0.698	0.237	0.573	1
hsa_miR_99bx_002196	-0.133	0.754	-0.15	0.723	0.029	0.946	-0.084	0.844	0.096	0.821	0.019	0.965	1
hsa_miR_9x_002231	-0.394	0.334	0.423	0.296	-0.326	0.43	0.569	0.141	-0.501	0.206	0.518	0.188	1
mmu_miR_379_001138	-0.31	0.455	0.515	0.192	-0.296	0.477	0.517	0.189	-0.284	0.496	0.611	0.108	1
rno_miR_29cx_001818	-0.648	0.082	-0.023	0.956	-0.695	0.056	0.293	0.482	-0.554	0.154	0.249	0.551	1
RNU44_001094	-0.137	0.747	-0.276	0.509	0.068	0.873	-0.255	0.542	0.104	0.807	-0.064	0.881	1
hsa_miR_10bx_002315	-0.164	0.699	-0.005	0.99	0.016	0.97	0.002	0.997	0.061	0.886	0.183	0.665	2
hsa_miR_1247_002893	-0.17	0.688	0.78	0.022	-0.187	0.658	0.615	0.105	-0.174	0.681	0.753	0.031	2
hsa_miR_1253_002894	-0.489	0.219	0.286	0.492	-0.596	0.119	0.456	0.256	-0.41	0.313	0.458	0.254	2
hsa_miR_125a_3p_002199	-0.35	0.396	-0.236	0.574	-0.142	0.738	-0.094	0.825	-0.127	0.764	0.043	0.92	2
hsa_miR_125a_5p_002198	-0.347	0.399	-0.397	0.33	-0.234	0.577	-0.068	0.872	-0.19	0.653	-0.179	0.671	2
hsa_miR_1267_002885	-0.225	0.592	0.402	0.323	-0.35	0.395	0.455	0.257	-0.212	0.614	0.45	0.263	2
hsa_miR_1271_002779	-0.126	0.767	0.166	0.695	-0.193	0.648	0.134	0.752	-0.131	0.757	0.22	0.6	2
hsa_miR_1303_002792	-0.233	0.578	-0.282	0.498	-0.156	0.713	-0.273	0.513	-0.133	0.754	-0.071	0.868	2
hsa_miR_141_000463	0.901	0.002	-0.265	0.525	0.906	0.002	-0.612	0.107	0.942	0	-0.557	0.151	2
hsa_miR_144x_002148	0.393	0.336	-0.417	0.304	0.561	0.148	-0.495	0.212	0.337	0.414	-0.492	0.216	2
hsa_miR_15ax_002419	-0.422	0.297	-0.014	0.975	-0.205	0.627	0.082	0.847	-0.431	0.286	0.232	0.58	2
hsa_miR_200bx_002274	-0.356	0.387	0.432	0.285	-0.408	0.316	0.519	0.188	-0.293	0.481	0.554	0.154	2
hsa_miR_203_000507	0.668	0.07	-0.118	0.782	0.758	0.029	-0.572	0.138	0.597	0.118	-0.298	0.474	2
hsa_miR_204_000508	-0.339	0.411	-0.201	0.634	-0.226	0.59	0.117	0.782	-0.49	0.218	-0.07	0.869	2
hsa_miR_29b_1x_002165	-0.24	0.568	-0.548	0.16	-0.332	0.422	-0.212	0.613	-0.16	0.705	-0.398	0.329	2
hsa_miR_30c_2x_002110	-0.206	0.625	-0.43	0.288	-0.22	0.601	-0.291	0.484	-0.065	0.878	-0.24	0.568	2
hsa_miR_326_000542	0.575	0.136	-0.391	0.338	0.77	0.025	-0.755	0.03	0.555	0.153	-0.479	0.23	2
hsa_miR_338_3p_002252	0.274	0.511	0.232	0.581	0.095	0.823	0.279	0.503	0.253	0.546	0.02	0.962	2
hsa_miR_33ax_002136	0.61	0.109	-0.49	0.218	0.581	0.131	-0.475	0.234	0.577	0.135	-0.719	0.045	2
hsa_miR_376c_002122	-0.361	0.38	0.54	0.167	-0.38	0.354	0.536	0.171	-0.342	0.407	0.618	0.103	2
hsa_miR_381_000571	-0.404	0.321	0.52	0.187	-0.447	0.266	0.548	0.16	-0.366	0.373	0.655	0.078	2
hsa_miR_410_001274	-0.39	0.34	0.449	0.265	-0.466	0.244	0.481	0.228	-0.371	0.365	0.566	0.143	2
hsa_miR_411_001610	-0.441	0.274	0.128	0.763	-0.363	0.376	0.21	0.617	-0.31	0.454	0.333	0.421	2
hsa_miR_424_000604	-0.207	0.623	0.564	0.145	-0.177	0.674	0.485	0.223	-0.187	0.658	0.621	0.1	2
hsa_miR_455_001280	-0.554	0.154	0.03	0.943	-0.512	0.195	0.423	0.296	-0.717	0.045	0.185	0.661	2
hsa_miR_486_3p_002093	0.077	0.856	-0.074	0.861	0.039	0.926	-0.207	0.622	0.071	0.868	-0.052	0.903	2
hsa_miR_487b_001285	-0.515	0.192	0.62	0.101	-0.48	0.228	0.616	0.104	-0.431	0.287	0.803	0.016	2
hsa_miR_500_001046	0.181	0.669	-0.649	0.081	0.118	0.781	-0.381	0.352	0.143	0.735	-0.72	0.044	2
hsa_miR_501_001047	0.257	0.538	-0.541	0.166	0.444	0.271	-0.742	0.035	0.258	0.537	-0.466	0.245	2
hsa_miR_502_3p_002083	0.166	0.695	-0.247	0.555	0.127	0.764	-0.287	0.49	0.027	0.949	-0.292	0.483	2
hsa_miR_505x_002087	0.17	0.688	-0.623	0.099	0.187	0.658	-0.614	0.105	0.131	0.758	-0.567	0.143	2
hsa_miR_519a_002415	-0.372	0.364	-0.1	0.813	-0.267	0.522	0.203	0.63	-0.528	0.178	0.031	0.943	2
hsa_miR_520D_3P_002743	-0.411	0.312	0.08	0.85	-0.549	0.159	0.308	0.458	-0.315	0.447	0.235	0.576	2
hsa_miR_539_001286	-0.355	0.388	0.457	0.254	-0.513	0.194	0.537	0.17	-0.338	0.413	0.526	0.181	2
hsa_miR_545_002267	-0.009	0.983	-0.358	0.383	-0.085	0.841	-0.227	0.588	-0.106	0.803	-0.323	0.435	2
hsa_miR_551bx_002346	-0.447	0.267	0.038	0.929	-0.529	0.178	0.251	0.548	-0.419	0.302	0.216	0.608	2
hsa_miR_571_001613	0.082	0.846	-0.333	0.42	-0.053	0.901	-0.228	0.587	0.113	0.79	-0.329	0.426	2
hsa_miR_577_002675	-0.148	0.727	0.213	0.613	0.02	0.962	0.113	0.791	0.042	0.922	0.369	0.368	2
hsa_miR_584_001624	0.256	0.541	-0.137	0.746	0.36	0.381	-0.443	0.272	0.344	0.404	-0.096	0.821	2
hsa_miR_589_001543	0.414	0.308	-0.129	0.76	0.211	0.616	-0.009	0.983	0.398	0.329	-0.366	0.373	2
hsa_miR_623_001555	0.452	0.261	-0.195	0.644	0.259	0.536	-0.079	0.852	0.437	0.279	-0.439	0.277	2
hsa_miR_629_002436	0.199	0.636	0.582	0.13	0.194	0.646	0.351	0.394	0.198	0.639	0.438	0.277	2
hsa_miR_639_001583	0.044	0.918	0.457	0.255	0.01	0.981	0.37	0.367	0.032	0.941	0.397	0.331	2
hsa_miR_671_3p_002322	-0.46	0.252	0.44	0.275	-0.51	0.197	0.515	0.191	-0.365	0.374	0.613	0.106	2
hsa_miR_758_001990	-0.408	0.315	0.174	0.681	-0.288	0.489	0.349	0.397	-0.296	0.477	0.38	0.354	2
hsa_miR_886_3p_002194	-0.24	0.568	-0.549	0.159	-0.014	0.974	-0.36	0.38	-0.166	0.695	-0.28	0.501	2
hsa_miR_886_5p_002193	0.134	0.752	-0.554	0.154	0.416	0.305	-0.611	0.107	0.176	0.677	-0.411	0.312	2
hsa_miR_99b_000436	-0.378	0.356	-0.289	0.487	-0.214	0.611	-0.056	0.894	-0.193	0.647	-0.043	0.92	2
hsa_let_7f_1x_002417	-0.404	0.321	-0.384	0.348	-0.438	0.277	-0.079	0.852	-0.399	0.327	-0.205	0.627	3
hsa_let_7ix_002172	0.183	0.664	0.157	0.71	0.031	0.942	0.233	0.579	0.174	0.68	0.015	0.972	3
hsa_miR_107_000443	0.262	0.53	-0.137	0.746	0.343	0.405	-0.43	0.288	0.309	0.457	-0.131	0.757	3
hsa_miR_142_3p_000464	0.228	0.587	-0.382	0.35	0.363	0.377	-0.388	0.343	0.401	0.325	-0.357	0.385	3
hsa_miR_190_000489	-0.782	0.022	0.393	0.336	-0.795	0.018	0.68	0.063	-0.861	0.006	0.642	0.086	3
hsa_miR_191x_002678	0.063	0.881	-0.19	0.653	0.164	0.697	-0.345	0.403	0.156	0.713	-0.08	0.85	3
hsa_miR_194x_002379	-0.269	0.519	0.664	0.072	-0.298	0.473	0.617	0.103	-0.264	0.527	0.716	0.046	3
hsa_miR_206_000510	0.424	0.295	-0.185	0.661	0.232	0.58	-0.063	0.882	0.426	0.293	-0.427	0.291	3
hsa_miR_23ax_002439	0.536	0.171	-0.42	0.301	0.361	0.38	-0.313	0.45	0.488	0.22	-0.664	0.072	3
hsa_miR_378_000567	-0.143	0.736	0.603	0.113	-0.122	0.773	0.447	0.267	-0.132	0.756	0.62	0.101	3
hsa_miR_424x_002309	-0.211	0.616	0.094	0.825	-0.278	0.504	0.169	0.689	-0.233	0.578	0.171	0.685	3
hsa_miR_425x_002302	0.003	0.995	0.238	0.571	0.081	0.849	-0.018	0.966	0.104	0.807	0.334	0.419	3
hsa_miR_450b_5p_002207	-0.048	0.911	-0.027	0.95	-0.007	0.987	-0.112	0.792	-0.06	0.887	0.049	0.907	3
hsa_miR_518f_002388	-0.458	0.253	0.485	0.223	-0.498	0.209	0.533	0.174	-0.426	0.292	0.644	0.085	3
hsa_miR_519e_002370	-0.472	0.237	-0.167	0.692	-0.343	0.405	0.161	0.704	-0.581	0.131	0.042	0.922	3
hsa_miR_520d_5p_002393	-0.389	0.34	-0.198	0.638	-0.28	0.501	0.129	0.761	-0.407	0.317	-0.002	0.996	3
hsa_miR_520f_001120	-0.256	0.54	-0.101	0.812	-0.378	0.355	0.141	0.739	-0.22	0.6	-0.003	0.994	3
hsa_miR_523_002386	-0.4	0.327	0.345	0.402	-0.486	0.222	0.392	0.337	-0.371	0.366	0.482	0.226	3
hsa_miR_542_3p_001284	-0.161	0.704	-0.037	0.931	-0.205	0.626	-0.02	0.963	-0.189	0.654	0.055	0.898	3
hsa_miR_545x_002266	-0.183	0.665	0.061	0.885	-0.194	0.646	0.048	0.911	-0.14	0.741	0.174	0.681	3
hsa_miR_548d_5p_002237	0.03	0.943	0.25	0.55	0.044	0.917	-0.001	0.999	0.031	0.943	0.289	0.487	3
hsa_miR_550_001544	0.088	0.836	0.088	0.837	-0.137	0.747	0.268	0.521	0.087	0.838	-0.024	0.954	3
hsa_miR_572_001614	-0.489	0.219	0.349	0.396	-0.564	0.146	0.423	0.296	-0.469	0.241	0.514	0.192	3
hsa_miR_586_001539	-0.447	0.267	0.329	0.426	-0.465	0.245	0.362	0.378	-0.364	0.375	0.533	0.174	3
hsa_miR_598_001988	0.429	0.289	-0.62	0.101	0.539	0.168	-0.818	0.013	0.374	0.361	-0.649	0.082	3
hsa_miR_605_001568	0.024	0.954	-0.312	0.452	-0.032	0.939	0.016	0.97	-0.156	0.712	-0.391	0.338	3
hsa_miR_622_001553	0.125	0.768	0.608	0.11	0.002	0.995	0.343	0.406	0.09	0.832	0.38	0.353	3
hsa_miR_627_001560	-0.237	0.571	0.593	0.121	-0.224	0.593	0.518	0.188	-0.218	0.604	0.659	0.075	3
hsa_miR_630_001563	-0.253	0.546	0.494	0.213	-0.256	0.541	0.473	0.237	-0.243	0.563	0.557	0.151	3
hsa_miR_643_001594	0.128	0.763	0.055	0.897	-0.044	0.917	0.066	0.876	0.113	0.79	-0.036	0.932	3
hsa_miR_655_001612	-0.398	0.329	0.543	0.164	-0.371	0.366	0.563	0.147	-0.393	0.335	0.655	0.078	3
hsa_miR_656_001510	-0.209	0.62	0.452	0.261	-0.221	0.598	0.463	0.248	-0.203	0.63	0.5	0.207	3
hsa_miR_744x_002325	-0.328	0.428	-0.509	0.198	-0.12	0.777	-0.335	0.417	-0.213	0.613	-0.248	0.554	3
hsa_miR_888_002212	-0.505	0.202	0.113	0.79	-0.587	0.126	0.277	0.506	-0.46	0.252	0.317	0.445	3
hsa_miR_934_002177	0.197	0.64	0.299	0.472	0.278	0.505	-0.048	0.91	0.212	0.614	0.292	0.482	3
hsa_miR_935_002178	-0.32	0.44	-0.138	0.745	-0.203	0.629	0.099	0.815	-0.499	0.208	0	1000	3
mmu_miR_495_001663	-0.194	0.646	0.55	0.158	-0.175	0.679	0.481	0.227	-0.192	0.649	0.594	0.121	3
hsa_let_7bx_002404	-0.166	0.694	0.157	0.71	-0.275	0.51	0.188	0.656	-0.128	0.762	0.209	0.619	4
hsa_let_7f_2x_002418	0.593	0.121	-0.284	0.495	0.38	0.354	-0.258	0.538	0.545	0.162	-0.591	0.123	4
hsa_let_7gx_002118	0.679	0.064	-0.326	0.431	0.753	0.031	-0.618	0.102	0.512	0.195	-0.549	0.159	4
hsa_miR_100x_002142	-0.007	0.987	-0.51	0.196	0.086	0.84	-0.337	0.414	0.207	0.623	-0.381	0.352	4
hsa_miR_10ax_002288	-0.185	0.661	0	0.999	-0.159	0.707	-0.027	0.949	-0.052	0.903	0.154	0.716	4
hsa_miR_1226x_002758	0.686	0.06	-0.44	0.275	0.843	0.009	-0.834	0.01	0.644	0.085	-0.567	0.142	4
hsa_miR_1244_002791	-0.061	0.886	0.461	0.25	-0.059	0.89	0.421	0.299	-0.088	0.836	0.45	0.263	4
hsa_miR_1248_002870	0.858	0.006	-0.365	0.374	0.751	0.032	-0.533	0.174	0.84	0.009	-0.699	0.054	4
hsa_miR_127_000452	-0.154	0.715	-0.316	0.446	-0.118	0.78	-0.185	0.661	-0.313	0.45	-0.272	0.515	4
hsa_miR_1276_002843	-0.066	0.876	0.512	0.194	-0.26	0.533	0.486	0.222	-0.047	0.913	0.443	0.272	4
hsa_miR_1282_002803	0.168	0.691	0.637	0.089	0.19	0.652	0.28	0.502	0.113	0.79	0.512	0.194	4
hsa_miR_1301_002827	-0.319	0.441	0.624	0.098	-0.339	0.411	0.57	0.141	-0.295	0.478	0.719	0.044	4
hsa_miR_150_000473	-0.107	0.801	-0.308	0.458	0.086	0.84	-0.213	0.612	0.079	0.853	-0.138	0.744	4
hsa_miR_199a_3p_002304	-0.066	0.877	0.273	0.513	0.064	0.88	0.201	0.634	-0.203	0.629	0.304	0.465	4
hsa_miR_19ax_002424	-0.339	0.411	0.574	0.136	-0.365	0.374	0.538	0.169	-0.327	0.429	0.684	0.061	4
hsa_miR_200cx_002286	0.741	0.036	-0.396	0.331	0.696	0.055	-0.535	0.172	0.814	0.014	-0.645	0.084	4
hsa_miR_205_000509	0.638	0.089	-0.501	0.206	0.832	0.01	-0.881	0.004	0.678	0.065	-0.568	0.142	4
hsa_miR_208b_002290	-0.526	0.18	-0.502	0.205	-0.447	0.267	-0.144	0.734	-0.452	0.26	-0.214	0.61	4
hsa_miR_211_000514	-0.036	0.933	0.133	0.753	-0.13	0.759	0.012	0.978	-0.04	0.925	0.137	0.747	4
hsa_miR_221x_002096	0.139	0.743	0.119	0.778	0.081	0.848	-0.097	0.819	0.111	0.793	0.072	0.866	4
hsa_miR_26a_2x_002115	0.329	0.426	-0.619	0.102	0.23	0.584	-0.37	0.367	0.203	0.63	-0.755	0.03	4
hsa_miR_296_3p_002101	0.027	0.95	-0.545	0.162	0.061	0.887	-0.489	0.218	-0.05	0.907	-0.49	0.218	4
hsa_miR_302c_000533	-0.487	0.221	0.085	0.842	-0.478	0.231	0.271	0.516	-0.45	0.263	0.286	0.492	4
hsa_miR_346_000553	-0.028	0.948	0.141	0.739	0.02	0.962	0.009	0.983	-0.144	0.734	0.137	0.746	4
hsa_miR_372_000560	-0.399	0.328	-0.127	0.764	-0.307	0.459	0.173	0.682	-0.56	0.149	0.025	0.954	4
hsa_miR_376a_000565	-0.176	0.677	0.732	0.039	-0.193	0.647	0.578	0.133	-0.175	0.678	0.718	0.045	4
hsa_miR_450a_002303	0.013	0.975	-0.359	0.383	0.281	0.5	-0.417	0.304	0.157	0.711	-0.199	0.636	4
hsa_miR_493_002364	-0.189	0.655	0.169	0.689	-0.294	0.479	0.202	0.631	-0.163	0.7	0.228	0.587	4
hsa_miR_502_001109	-0.279	0.503	0.531	0.176	-0.272	0.515	0.466	0.245	-0.298	0.473	0.631	0.094	4
hsa_miR_503_001048	0.417	0.305	-0.39	0.34	0.602	0.114	-0.637	0.089	0.598	0.117	-0.392	0.337	4
hsa_miR_505_002089	-0.298	0.473	-0.059	0.889	-0.338	0.413	0.034	0.937	-0.288	0.489	0.094	0.824	4
hsa_miR_517c_001153	-0.37	0.367	-0.1	0.815	-0.266	0.525	0.203	0.63	-0.527	0.18	0.03	0.944	4
hsa_miR_518b_001156	-0.525	0.182	0.366	0.373	-0.533	0.174	0.517	0.189	-0.557	0.152	0.513	0.194	4
hsa_miR_518d_001159	-0.323	0.435	0.035	0.935	-0.24	0.566	0.082	0.847	-0.252	0.546	0.226	0.59	4
hsa_miR_518e_002395	-0.445	0.269	0.112	0.791	-0.354	0.389	0.221	0.6	-0.336	0.416	0.349	0.397	4
hsa_miR_521_001122	-0.358	0.384	-0.133	0.753	-0.231	0.582	0.156	0.711	-0.499	0.208	0.007	0.986	4
hsa_miR_551a_001519	-0.102	0.81	0.497	0.21	-0.023	0.957	0.332	0.422	-0.051	0.904	0.551	0.157	4
hsa_miR_570_002347	0.349	0.396	-0.851	0.007	0.507	0.199	-0.771	0.025	0.432	0.286	-0.811	0.015	4
hsa_miR_587_001540	-0.37	0.367	-0.1	0.813	-0.266	0.525	0.202	0.631	-0.527	0.18	0.029	0.945	4
hsa_miR_589_002409	-0.201	0.633	0.624	0.098	-0.166	0.694	0.528	0.179	-0.226	0.591	0.655	0.078	4
hsa_miR_601_001558	0.43	0.287	-0.154	0.715	0.229	0.585	-0.038	0.928	0.417	0.305	-0.393	0.336	4
hsa_miR_616_002414	-0.284	0.495	0.165	0.697	-0.442	0.272	0.249	0.552	-0.263	0.529	0.224	0.594	4
hsa_miR_628_3p_002434	0.041	0.923	0.496	0.211	-0.052	0.903	0.492	0.216	0.02	0.962	0.388	0.342	4
hsa_miR_657_001512	0.191	0.651	0.342	0.408	-0.004	0.992	0.37	0.366	0.194	0.645	0.17	0.687	4
mmu_let_7dx_001178	0.163	0.699	0.107	0.8	0.325	0.432	-0.219	0.602	0.273	0.514	0.189	0.654	4
mmu_miR_129_3p_001184	-0.289	0.488	-0.42	0.3	-0.38	0.353	0.065	0.879	-0.402	0.323	-0.363	0.377	4
mmu_miR_134_001186	-0.383	0.348	0.216	0.608	-0.45	0.264	0.372	0.364	-0.378	0.356	0.316	0.446	4
mmu_miR_187_001193	-0.268	0.521	-0.62	0.101	-0.196	0.642	-0.362	0.378	-0.316	0.446	-0.431	0.286	4
