# Supplementary material for: MicroRNAs Associated with the Efficacy of Photodynamic Therapy in Biliary Tract Cancer Cell Lines
Source: MDPI journal article supplement (doi:10.3390/ijms151120134), 2014-11-05
Supplement: s1 [file s1 › ijms-58226_Revision_Suppl 04 targets.xlsx]

## Sheet: Supplement 04
Gene Name	106b	106b val	130a	130a val	135a	135a val	135b	135b val	141	141 val	200a	200a val	200b	200b val	200c	200c val	203	203 val	20a*	20a* val	25	25 val	326	326 val	330 val	330-3p	330-5p	429	429 val	489	489 val	516b-3p	590 val	590-5p	664	664 val	93*	93* val		Total
JUN		1								1		1		1				1		1		1																		7
NOV				1																																				1
A2M																										1									1					2
A2ML1																																			1					1
A4GNT			1																				1																	2
AADAC																		1																						1
AADACL1																																		1						1
AAK1																										1														1
AAMP																											1													1
AANAT																											1										1			2
AASDH																																		1						1
AATK																											1													1
ABAT																			1															1						2
ABCA13			1																																					1
ABCA6																																			1					1
ABCA9																																			1					1
ABCB10																			1				1																	2
ABCB4																							1																	1
ABCB5																														1		1								2
ABCB6																	1																							1
ABCB7			1																																					1
ABCB9																	1																							1
ABCC1														1		1								1													1			4
ABCC12																							1																	1
ABCC3																																								0
ABCC6																	1																							1
ABCD2					1		1																																	2
ABCD4																																					1			1
ABCE1																		1																						1
ABCF2																																								0
ABCG1																																					1			1
ABCG2																								1											1					2
ABCG4																				1																				1
ABCG5																										1														1
ABHD11																																			1					1
ABHD13	1																																							1
ABHD14B																																								0
ABHD9																			1																					1
ABI2																																					1			1
ABI3BP																			1																					1
ABL1																		1																						1
ABL2																																					1			1
ABLIM1																			1																					1
ABLIM2																					1																			1
ABP1																							1																	1
ACAA1																					1																			1
ACAA2																																								0
ACACA																					1																			1
ACAD10																																					1			1
ACADL	1																				1																			2
ACADS																							1																	1
ACADSB																							1																	1
ACADVL			1																																1					2
ACAT1																																					1			1
ACAT2																										1														1
ACBD6																			1																					1
ACCN3																							1																	1
ACD																																								0
ACE																													1											1
ACHE																																					1			1
ACIN1																																					1			1
ACMSD																																			1					1
ACO2																																					1			1
ACOT12																			1																					1
ACOT7				1					1		1																													3
ACOT8																							1												1					2
ACOT9																			1				1																	2
ACOX2			1																				1																	2
ACP2																																								0
ACP5									1		1										1																			3
ACPL2																														1										1
ACRBP																											1													1
ACRC																							1																	1
ACSBG1																																								0
ACSF2	1																																							1
ACSF3																					1																			1
ACSL1																														1										1
ACSL5					1		1																1																	3
ACSL6																																1			1					2
ACTA2																											1													1
ACTC1																												1							1					2
ACTG1										1																														1
ACTL6A																																			1					1
ACTL6B																																								0
ACTL7A			1																																					1
ACTL7B																	1																							1
ACTN1																							1																	1
ACTN4																							1																	1
ACTR2																												1												1
ACTR6													1		1																									2
ACTR8																			1																1					2
ACTRT2																																					1			1
ACVR1	1																																							1
ACVR2A																		1						1											1					3
ACVRL1																					1		1				1													3
ADAD2																																								0
ADAL																																		1						1
ADAM10													1		1																									2
ADAM11																																			1					1
ADAM12																												1												1
ADAM17																			1								1													2
ADAM19																					1																			1
ADAM20																																					1			1
ADAM23			1						1		1						1																							4
ADAM33																																								0
ADAM7																					1																			1
ADAM9	1																																		1		1			3
ADAMDEC1																											1			1										2
ADAMTS10																											1													1
ADAMTS12									1		1															1														3
ADAMTS17																											1													1
ADAMTS19			1																		1																			2
ADAMTS3																										1														1
ADAMTS5																			1																					1
ADAMTS6																			1																					1
ADAMTS8									1		1												1																	3
ADAMTSL1									1		1																													2
ADCK1																																					1			1
ADCY1																											1													1
ADCY6																					1																			1
ADCY7																							1			1									1					3
ADCYAP1																										1									1					2
ADCYAP1R1																											1													1
ADD1																																					1			1
ADD3																			1											1					1					3
ADH1B																												1												1
ADHFE1																										1														1
ADI1																									1															1
ADIPOQ																							1																	1
ADIPOR2																												1									1			2
ADK																																			1					1
ADM																					1																			1
ADO					1		1																												1					3
ADORA2A																							1																	1
ADORA3																																								0
ADPGK																																								0
ADPRHL2																																			1					1
ADRA2B																	1																							1
ADRA2C																											1													1
ADRB1									1		1																										1			3
ADSS																			1																					1
AEBP1																											1													1
AFAP1L2																																			1					1
AFF2									1		1																			1										3
AFF3																							1																	1
AFG3L2			1																				1																	2
AFM																																								0
AFP												1																												1
AFTPH																																		1						1
AGBL2																														1										1
AGL									1		1																								1					3
AGMAT																					1																			1
AGPAT5													1		1											1														3
AGR2																			1																					1
AGT																													1								1			2
AGTPBP1	1																																							1
AGTR1																																			1					1
AGTR2																									1															1
AGTRL1																							1														1			2
AGXT2L1																							1																	1
AHCTF1																																			1					1
AHI1			1																							1														2
AHNAK	1																						1																	2
AHRR	1																															1								2
AHSA1										1										1		1																		3
AHSA2			1																																					1
AHSG																																								0
AIF1																																								0
AIFM3																																								0
AIM1L																										1											1			2
AJAP1																																								0
AK1																																								0
AKAP10	1																		1		1																			3
AKAP11																			1																					1
AKAP5					1		1																									1								3
AKAP6																														1							1			2
AKAP9																																					1			1
AKNA																							1																	1
AKR1A1																																			1					1
AKR1B1																										1											1			2
AKR1C1					1		1																																	2
AKR1C2					1		1																																	2
AKR1C3					1		1																																	2
AKR1CL2																																			1					1
AKT1		1		1						1		1		1		1		1		1					1										1			1		11
AKT2																						1																1		2
AKT3																																1								1
AKTIP									1		1																													2
ALAD																																1								1
ALAS1																	1																							1
ALAS2																			1																					1
ALDH16A1																			1																					1
ALDH1A1					1		1							1		1																								4
ALDH1A2																																			1					1
ALDH1A3																											1													1
ALDH1L2																																			1					1
ALDH3B1																														1										1
ALDH3B2									1		1																													2
ALDH7A1																							1				1													2
ALDOB																																			1					1
ALG12																																					1			1
ALG14																																					1			1
ALG2																												1												1
ALG5																																			1					1
ALG6																																			1					1
ALG8					1		1														1		1												1					5
ALG9																																1								1
ALKBH1																																			1					1
ALKBH7																																		1						1
ALLC																																			1		1			2
ALMS1							1																																	1
ALOX15B																											1													1
ALOX5						1																																		1
ALOX5AP						1																																		1
ALOXE3																			1								1													2
ALPK1																							1																	1
ALPK2																	1																							1
ALPP																																			1					1
ALS2CR12																																			1					1
ALS2CR13													1		1													1												3
ALS2CR4					1		1																																	2
ALS2CR8																	1																							1
ALX1																																			1					1
ALX4																																								0
AMAC1													1		1																									2
AMACR										1																	1	1												3
AMELX	1		1																																1		1			4
AMELY	1																																				1			2
AMH																													1											1
AMHR2																			1																					1
AMICA1																																					1			1
AMIGO2																											1													1
AMOTL1																			1																					1
AMPH																										1														1
ANAPC13																					1																			1
ANG				1																																				1
ANGEL1																							1																	1
ANGPT4																																					1			1
ANGPTL2			1																																					1
ANGPTL6																																								0
ANK1																							1																	1
ANK3																																					1			1
ANKFY1																																1								1
ANKHD1																																								0
ANKIB1																																			1					1
ANKLE1																																								0
ANKLE2																																					1			1
ANKMY1																			1																					1
ANKRA2																																			1					1
ANKRD12																																1								1
ANKRD13A																			1																					1
ANKRD13C	1																																							1
ANKRD13D					1		1																																	2
ANKRD16																																					1			1
ANKRD26																																			1					1
ANKRD35			1																																					1
ANKRD37																														1					1					2
ANKRD44																							1																	1
ANKRD5																										1	1													2
ANKRD50																																					1			1
ANKRD57																			1																					1
ANKRD6																			1																1					2
ANKRD9	1																																							1
ANKS3																																					1			1
ANKS6																							1																	1
ANO5																																1								1
ANP32B																										1														1
ANP32E									1		1																													2
ANTXR2																																1			1					2
ANXA11																											1													1
ANXA13																																					1			1
ANXA2																	1																							1
ANXA7					1		1																																	2
AOAH																					1																			1
AOC2																																								0
AOF1																										1														1
AP1AR																																1								1
AP1B1																																			1					1
AP1G1																			1																					1
AP1G2			1																											1										2
AP1GBP1																																			1					1
AP1M2																							1																	1
AP1S1																														1					1					2
AP1S2																												1												1
AP2M1																										1												1		2
AP3B1																										1														1
AP3S2																																					1			1
AP4B1																																			1					1
AP4M1																																1								1
AP4S1																																			1					1
APBA2																							1																	1
APBB1IP																											1													1
APBB3																										1														1
APC			1			1		1																													1			4
APCDD1																											1													1
APH1B																			1																1					2
API5			1																																					1
APLN																							1																	1
APLP1																	1																							1
APOA2																																			1					1
APOA4			1																																					1
APOA5																																					1			1
APOBEC1																							1																	1
APOBEC3A																																					1			1
APOBEC3D																					1																			1
APOBEC3F																											1					1								2
APOBEC3G																						1					1													2
APOC1																																								0
APOH																														1										1
APOL1																					1																			1
APOL2			1																																					1
APOL3			1																																1					2
APOL4																										1														1
APOLD1																																1								1
APOM																							1												1					2
APOOL																																								0
APP		1																		1																				2
APPL1																																1								1
APPL2	1																																		1					2
APRT																		1						1																2
APTX																											1													1
AQP10																																								0
AQP11									1		1																													2
AQP3																			1								1													2
AQP4																														1					1					2
AQP6																											1													1
AQP8																							1				1													2
AR																							1																	1
ARC																							1																	1
ARCN1		1																		1																				2
ARF6																																					1			1
ARFRP1																																					1			1
ARHGAP12					1		1												1																					3
ARHGAP18																																			1					1
ARHGAP20																										1														1
ARHGAP22																																					1			1
ARHGAP25																											1								1		1			3
ARHGAP26																																			1					1
ARHGAP30																																								0
ARHGAP42																																1								1
ARHGEF10	1																																							1
ARHGEF11																							1																	1
ARHGEF16																											1													1
ARHGEF18	1																																							1
ARHGEF19																					1																			1
ARHGEF3																																					1			1
ARHGEF5			1																																					1
ARHGEF6																										1														1
ARID1B																																					1			1
ARID2																					1																1			2
ARID4A													1		1																									2
ARID4B																																					1			1
ARID5A																																			1					1
ARID5B																							1																	1
ARIH2																																						1		1
ARL11																			1																		1			2
ARL15	1																										1													2
ARL16			1																																					1
ARL2BP																					1														1					2
ARL3																																					1			1
ARL5A																			1											1										2
ARL5B																			1																					1
ARL6IP1			1																																					1
ARL8A																																			1					1
ARL8B																																			1					1
ARMC10																			1																					1
ARMC2																					1														1					2
ARMC3																												1												1
ARMC4																																		1						1
ARMC5																											1													1
ARMCX1																							1																	1
ARMCX2																																					1			1
ARMCX3																																			1					1
ARMET																														1										1
ARNT2	1																																							1
ARNTL2			1																																1					2
ARPC1B																										1														1
ARPC2																			1																					1
ARPC5L									1		1																1											1		4
ARPP-21																		1		1																				2
ARR3																																								0
ARRB2																							1																	1
ARRDC2																																					1			1
ARRDC3									1		1																													2
ARS2										1						1																								2
ARSB																																			1					1
ARSE	1																																							1
ARSF																							1																	1
ARSK																	1						1																	2
ART1																																					1			1
ARTN																																			1					1
AS3MT																																			1					1
ASB1																										1														1
ASB12																																								0
ASB2																										1														1
ASB3																										1											1			2
ASB7																																								0
ASB9																										1														1
ASCC3L1																							1																	1
ASCL3																							1												1					2
ASF1A																																			1					1
ASF1B																											1													1
ASH1L																																		1						1
ASH2L																																								0
ASIP																														1										1
ASL																																								0
ASNA1																	1																		1					2
ASPHD2																							1																	1
ASPM													1		1															1										3
ASTE1																											1													1
ASXL1																											1										1			2
ASXL2																																			1					1
ASXL3																			1																					1
ATAD2																			1																					1
ATAD2B	1																																							1
ATAD3C			1																																					1
ATAD5	1																																				1			2
ATF6									1		1						1																							3
ATF7																																1								1
ATF7IP2																												1												1
ATG10																														1										1
ATG2A																							1																	1
ATG2B																																1								1
ATG4D			1																								1													2
ATG7																			1																2					3
ATG9A																											1													1
ATL3	1																																							1
ATM										1		1																	1						1					4
ATMIN	1				1		1																					1												4
ATN1														1													1		1											3
ATOH1																																					1			1
ATOH7																							1																	1
ATOH8																							1																	1
ATOX1																											1													1
ATP10A																			1																					1
ATP10B									1		1																													2
ATP11B																																			1					1
ATP11C			1																1																					2
ATP12A	1																																				1			2
ATP1A2			1																													1								2
ATP1A4																																			1		1			2
ATP1B1													1		1								1																	3
ATP1B2																					1																			1
ATP2A2														1																										1
ATP2B1						1																																		1
ATP2B2																											1													1
ATP5C1																																					1			1
ATP5E			1																																					1
ATP5G2																																					1			1
ATP5G3									1		1																													2
ATP5I																										1									1					2
ATP5J																			1																					1
ATP5S																			1							1														2
ATP6V0A2																					1									1										2
ATP6V0A4																																								0
ATP6V0C																																								0
ATP6V0D2																					1									1										2
ATP6V1A																					1																			1
ATP6V1C2																																			1					1
ATP6V1D																																1								1
ATP6V1G3																	1																							1
ATP7A																							1														1			2
ATP7B																											1													1
ATP8A1																			1																					1
ATP8A2																		1						1																2
ATP8B1	1																																							1
ATP8B2																					1																			1
ATP8B4			1																																					1
ATPAF2			1																																		1			2
ATPBD1C																																			1					1
ATPIF1																							1											1						2
ATRIP																											1													1
ATRN			1																1		1																			3
ATXN1				1																																				1
ATXN2																																					1			1
ATXN7																					1																			1
ATXN7L2																																								0
ATXN7L3																																								0
AUH																																			1					1
AUP1																														1										1
AURKA																					1																			1
AURKB														1												1														2
AVEN																																			1					1
AVIL																											1													1
AVPI1																	1																							1
AVPR1B																																		1						1
AXIN1																																			1					1
AXUD1																											1													1
AZI1																							1																	1
AZI2																																			1					1
AZU1																							1																	1
B3GALNT1																																						1		1
B3GALT5	1																						1																	2
B3GALTL					1		1																																	2
B3GNT1													1		1																									2
B3GNT5									1		1																													2
B3GNT7																																			1		1			2
B4GALNT1																							1																	1
B4GALNT3																																								0
B4GALT4																							1																	1
B7H6																																1								1
B9D1																														1										1
bA16L21.2.1																																					1			1
BAALC																											1													1
BAAT																																			1					1
BACE1																							1																	1
BACE2																																1								1
BACH1									1		1																													2
BAG2									1		1																													2
BAHD1																							1																	1
BAI1																																								0
BAI3			1																																1					2
BAIAP2L1																																			1					1
BAMBI	1																			1																				2
BAP1																																1								1
BARX2																																			1					1
BATF																							1																	1
BATF2																							1									1								2
BAX																1		1					1																	3
BAZ2B																														1										1
BBC3		1																																				1		2
BBS10									1		1																													2
BBS12													1		1													1												3
BBS9										1						1																1				1				4
BCAN																																					1			1
BCAP31																							1																	1
BCAR3																																			1					1
BCAS1																																					1			1
BCHE													1		1													1												3
BCKDHB																							1												1					2
BCL11B																							1																	1
BCL2		1												1		1				1																				4
BCL2A1																																			1					1
BCL2L1						1																																		1
BCL2L11		1										1								1	1	1					1											1		7
BCL2L14																											1													1
BCL3																																								0
BCL6														1																										1
BCL6B									1		1																													2
BCL7A																																								0
BCL9									1		1																													2
BCLAF1																																								0
BCMO1																																			1					1
BCR				1														1					1																	3
BDH1																					1		1																	2
BDH2																														1				1						2
BDKRB2																																			1					1
BDNF				1																								1												2
BDP1					1		1																1																	3
BEST3	1																																							1
BEST4																																					1			1
BET1L																										1														1
BEX2																																			1					1
BFSP2																											1													1
BGLAP								1																																1
BHLHB3																														1										1
BHLHB9																																			1					1
BHMT2																							1																	1
BID																																						1		1
BIK																							1																	1
BIN1																1																								1
BIRC3												1																												1
BIRC5																		1																						1
BIRC6																			1																					1
BIRC7																							1																	1
BLCAP																																1								1
BLMH																											1													1
BLOC1S2																																		1						1
BLVRB																																			1					1
BMP10																														1										1
BMP2						1		1		1										1										1										5
BMP4		1																		1																				2
BMPR2																				1																				1
BMX																																			1					1
BNC1			1																																					1
BNC2																																			1					1
BNIP2																				1																				1
BNIP3L																																						1		1
BNIPL	1																																							1
BOLL																																					1			1
BPGM																																					1			1
BPHL																							1																	1
BPNT1					1		1																																	2
BRAF																																					1			1
BRAP																							1															1		2
BRCA1		1										1								1																		1		4
BRD2																																		1						1
BRD3										1																											1			2
BRD4																																								0
BRD7																1																								1
BRD8																		1																						1
BRDT																	1																		1					2
BRMS1																							1																	1
BRMS1L																	1																							1
BRPF1																																								0
BRUNOL6																											1								1					2
BSG		1																		1																				2
BSN																					1																			1
BTAF1	1																																							1
BTBD11																																								0
BTBD16					1		1																																	2
BTBD7																																1								1
BTBD8																																								0
BTD																	1																							1
BTG3	1																																							1
BTG4																																			1					1
BTN3A1	1																						1																	2
BTN3A2	1				1		1																									1								4
BTN3A3	1																															1								2
BTNL3																																								0
BTNL8																			1																					1
BTRC	1																																							1
BUB1	1																																							1
BUB1B																							1																	1
BUB3																																			1					1
BVES																																		1	1					2
BZW1																																								0
C10orf10																							1																	1
C10orf11																																			1					1
C10orf132																							1																	1
C10orf141																																			1					1
C10orf26																										1														1
C10orf27																																					1			1
C10orf28																																			1					1
C10orf30																																					1			1
C10orf32													1		1											1														3
C10orf47																																1								1
C10orf53																	1																							1
C10orf57																					1																			1
C10orf65																					1																			1
C10orf67																																					1			1
C10orf76																												1												1
C10orf78																	1																							1
C10orf79																																			1					1
C10orf82																											1													1
C10orf88																																					1			1
C10orf90																														1							1			2
C10orf92																																					1			1
C10orf95																																								0
C11orf1																			1																					1
C11orf10																			1																					1
C11orf38																																		1						1
C11orf40																											1													1
C11orf54																																			1					1
C11orf74																					1														1					2
C11orf77																											1													1
C11orf80																																					1			1
C11orf82	1																																							1
C12orf12																																					1			1
C12orf23									1		1																													2
C12orf25																							1														1			2
C12orf35																												1												1
C12orf40																																			1					1
C12orf41																							1																	1
C12orf43																											1													1
C12orf49																																					1			1
C12orf53																			1																					1
C12orf54																																								0
C12orf57																			1																					1
C12orf59					1		1																														1			3
C12orf60																																			1					1
C12orf65																					1																			1
C12orf74																																1								1
C13orf16			1																																					1
C13orf18																																			1					1
C13orf23																																					1			1
C13orf27	1																													1							1			3
C14orf101																																1								1
C14orf109																																			2					2
C14orf115																							1																	1
C14orf130													1		1																									2
C14orf135					1		1																																	2
C14orf140																										1														1
C14orf143																																					1			1
C14orf145	1																																							1
C14orf147																	1																							1
C14orf156																																					1			1
C14orf172																														1										1
C14orf178																																			1					1
C14orf180																							1																	1
C14orf2																							1																	1
C14orf21																										1														1
C14orf24																			1																					1
C14orf39																							1																	1
C14orf43																										1														1
C14orf83																																			1					1
C14orf94																																			1					1
C15orf17	1																																							1
C15orf24																														1										1
C15orf32																																			1					1
C15orf33													1		1													1												3
C15orf37																					1		1																	2
C15orf54																							1																	1
C15orf55																																			1					1
C15orf56																																					1			1
C16orf24													1		1													1												3
C16orf46																											1													1
C16orf5																										1														1
C16orf53																											1													1
C16orf55																																			1					1
C16orf59																											1													1
C16orf61			1																																					1
C16orf72																																					1			1
C16orf80																																			1					1
C16orf82																											1			1										2
C17orf28																											1													1
C17orf47																											1								1					2
C17orf48																																		1						1
C17orf55																							1				1													2
C17orf57													1		1													1												3
C17orf63	1																																							1
C17orf64																							1																	1
C17orf68																							1																	1
C17orf70																							1																	1
C17orf77																																			1					1
C17orf78																					1																			1
C17orf85																														1										1
C17orf91																																						1		1
C18orf1																																1								1
C18orf19																																			1					1
C18orf32	1																																							1
C18orf34																	1									1									1					3
C18orf45																																			1					1
C18orf54																																			1					1
C19orf18																											1													1
C19orf19																											1													1
C19orf2	1																																							1
C19orf21																							1																	1
C19orf22																																			1					1
C19orf23																																			1					1
C19orf25																							1				1													2
C19orf28																														1										1
C19orf33																																								0
C19orf43																			1																					1
C19orf50																							1																	1
C19orf57																																					1			1
C19orf60																																								0
C19orf61																											1													1
C1D					1		1																												1					3
C1GALT1																											1													1
C1GALT1C1																																								0
C1orf101									1		1																							1						3
C1orf105																											1													1
C1orf107																							1																	1
C1orf108																														1										1
C1orf109																																					1			1
C1orf113																																								0
C1orf114																																					1			1
C1orf115																							1																	1
C1orf122																																			1					1
C1orf131																	1																							1
C1orf135	1																																							1
C1orf14																	1																		1					2
C1orf149																																					1			1
C1orf151																					1																			1
C1orf161																											1													1
C1orf164																							1																	1
C1orf172																	1				1																			2
C1orf174																					1																			1
C1orf176																																			1					1
C1orf182																																			1					1
C1orf183																																					1			1
C1orf186																																					1			1
C1orf192																																								0
C1orf194																																					1			1
C1orf198																																			1					1
C1orf2			1																																					1
C1orf201																			1																					1
C1orf21																																			1		1			2
C1orf210																					1																			1
C1orf212																											1													1
C1orf213																			1				1																	2
C1orf222																																			1					1
C1orf26																												1												1
C1orf34																											1													1
C1orf38																											1													1
C1orf41	1																																							1
C1orf50																																					1			1
C1orf51																																								0
C1orf55																					1																			1
C1orf63	1																																							1
C1orf64																							1																	1
C1orf65																							1														1			2
C1orf66																											1													1
C1orf74									1		1																										1			3
C1orf76													1		1								1					1												4
C1orf77																							1																	1
C1orf83																							1																	1
C1orf84																																			1					1
C1orf88																											1										1			2
C1orf90																							1																	1
C1orf92																											1													1
C1orf93																																					1			1
C1orf94																																					1			1
C1orf96																																			1					1
C1QBP					1		1																																	2
C1QL1																																								0
C1QTNF1																																					1			1
C1QTNF5																																					1			1
C1S			1																																1					2
C20orf103																										1														1
C20orf116			1																																					1
C20orf118																																			1					1
C20orf121	1																																							1
C20orf132																										1														1
C20orf134																																					1			1
C20orf141																																								0
C20orf151																							1																	1
C20orf152													1		1													1												3
C20orf160																	1																				1			2
C20orf186																											1													1
C20orf19																							1																	1
C20orf200																																								0
C20orf29													1		1																									2
C20orf32																			1																					1
C20orf39																																			1					1
C20orf59																																			1		1			2
C20orf67																							1																	1
C20orf7									1		1																													2
C20orf75																																								0
C20orf77																																			1					1
C20orf79																														1										1
C20orf85																																			1					1
C21orf123																																								0
C21orf2																																1					1			2
C21orf29																												1												1
C21orf55																					1																			1
C21orf58	1																																							1
C21orf66																																			1					1
C21orf7																											1								1					2
C21orf70																											1													1
C22orf23																										1	1								1		1			4
C22orf25			1																																					1
C22orf29																							1				1													2
C22orf39																												1												1
C22orf9																																			1		1			2
C2CD2																			1				1																	2
C2CD3																																								0
C2orf13					1		1																																	2
C2orf29			1																1																					2
C2orf3																										1														1
C2orf33									1		1																													2
C2orf34																	1																							1
C2orf37																																					1			1
C2orf42																											1													1
C2orf47																																					1			1
C2orf50																																								0
C2orf51																	1																							1
C2orf53																							1																	1
C2orf63													1		1													1												3
C2orf64	1																																							1
C2orf65																																			1					1
C2orf67																																					1			1
C3			1																																					1
C3orf14	1																1																							2
C3orf15																																			1					1
C3orf18																							1				1								1					3
C3orf23									1		1																	1									1			4
C3orf24																																					1			1
C3orf25																																			1					1
C3orf28																											1													1
C3orf30																																			1					1
C3orf31																																			1					1
C3orf33																					1					1														2
C3orf34													1		1																									2
C3orf35																			1																					1
C3orf43																														1										1
C3orf52																																					1			1
C3orf63									1		1																													2
C3orf65																	1																				1			2
C3orf67									1		1																													2
C3orf68																										1														1
C4BPB									1		1																								1					3
C4orf16																												1												1
C4orf17																																			1					1
C4orf18																										1														1
C4orf19					1		1																														1			3
C4orf26																																					1			1
C4orf27													1		1													1												3
C4orf34									1		1																													2
C4orf35																																			2					2
C4orf36																											1										1			2
C4orf37													1		1																									2
C4orf39																											1	1							1					3
C4orf41																			1																					1
C4orf42																					1																			1
C4orf6																										1														1
C4orf8																																					1			1
C5AR1																																			1					1
C5orf13																																								0
C5orf22																																					1			1
C5orf24																																					1			1
C5orf25																																			1					1
C5orf28	1																		1																					2
C5orf30			1																																					1
C5orf32	1																																							1
C5orf33																																			1					1
C5orf36					1		1																																	2
C5orf4																																		1						1
C5orf40																																			1					1
C5orf41																																1								1
C5orf5																	1																							1
C6orf1																																					1			1
C6orf106																																			1					1
C6orf117																							1												1					2
C6orf120	1																																							1
C6orf124																																					1			1
C6orf125																											1													1
C6orf129																							1																	1
C6orf130																																								0
C6orf134										1																														1
C6orf138																														1					1					2
C6orf154																	1																							1
C6orf170					1		1																												1					3
C6orf173																							1																	1
C6orf189																										1														1
C6orf192																					1																			1
C6orf201																																			1					1
C6orf224																	1																							1
C6orf25																																					1			1
C6orf65																																			1					1
C6orf66																			1																1					2
C6orf72																																			1					1
C6orf81																																								0
C6orf97					1		1																																	2
C7orf24																																			1		1			2
C7orf29																							1									1								2
C7orf30			1																																					1
C7orf33																							1				1													2
C7orf36																										1														1
C7orf41																																								0
C7orf43	1																						1																	2
C7orf45																												1												1
C7orf46																											1										1			2
C7orf49																							1																	1
C7orf50																							1																	1
C7orf51																																								0
C7orf54																																					1			1
C7orf58													1		1																									2
C8G																							1														1			2
C8orf22													1		1													1							1					4
C8orf34																																			1					1
C8orf4																	1																							1
C8orf45																										1														1
C8orf53																																			2					2
C8orf55																														1										1
C8orf59																	1																				1			2
C8orf73																																					1			1
C8orf79																	1																							1
C9orf100																											1													1
C9orf102									1		1																													2
C9orf11																																			1					1
C9orf116																	1																							1
C9orf117	1																																							1
C9orf125																																			1					1
C9orf126																	1		1																2					4
C9orf128																							1																	1
C9orf135									1		1										1																			3
C9orf142																							1				1													2
C9orf156																											1													1
C9orf16																																								0
C9orf163																																					1			1
C9orf164																											1										1			2
C9orf165																																			1					1
C9orf18																							1																	1
C9orf19																																					1			1
C9orf21																																			1					1
C9orf24																											1													1
C9orf25																																					1			1
C9orf3																							1																	1
C9orf37																																					1			1
C9orf40	1																									1									1					3
C9orf43																										1														1
C9orf47					1		1																																	2
C9orf5		1																																						1
C9orf52																							1																	1
C9orf6																			1																					1
C9orf66																																					1			1
C9orf68																																			1					1
C9orf71																							1																	1
C9orf72																			1																					1
C9orf75																																			1					1
C9orf78																																			1					1
C9orf79																	1																							1
C9orf85																																			1					1
C9orf86																																								0
C9orf9																																		1						1
C9orf90					1		1																																	2
C9orf91																							1																	1
CA10																																			1					1
CA11																																								0
CA14																			1																					1
CA5A																																1			1					2
CA5B																																1								1
CA6																																			1					1
CABIN1																							1																	1
CABP7																											1													1
CACHD1																			1																					1
CACNA1B																																			1					1
CACNA1C																																				1				1
CACNA1D					1		1																																	2
CACNA1E					1		1																1																	3
CACNA1F			1																																					1
CACNA1S																																					1			1
CACNA2D2																																								0
CACNA2D4													1		1																									2
CACNB1					1		1																													1				3
CACNB2																												1												1
CACNB3																																					1			1
CACNB4																					1														1					2
CACNG2																																					1			1
CACNG6																							1				1													2
CACNG7																																								0
CADM2																			1																					1
CADM3																																					1			1
CADM4																							1																	1
CADPS																																			1					1
CADPS2																			1																					1
CAGE1																											1													1
CALB2																																			1					1
CALCA																																								0
CALCB																											1													1
CALCR									1		1																													2
CALR																	1						1																	2
CALU													1		1																									2
CALY																							1																	1
CAMK1G					1		1																1																	3
CAMK2A																							1																	1
CAMK4					1		1																																	2
CAMLG																					1																			1
CAMSAP1L1																																			1		1			2
CAMTA1	1																																							1
CAND1																			1																					1
CAP2					1		1																																	2
CAPN10			1																																					1
CAPN11																							1														1			2
CAPN12																							1																	1
CAPN13																																					1			1
CAPN3																																			1					1
CAPN5																																			1					1
CAPRIN2	1																										1								1					3
CAPS																							1																	1
CAPSL																																					1			1
CAPZA2																																			1					1
CAPZA3																										1														1
CARD14																			1																					1
CARD6																					1																			1
CARD8																														1										1
CARD9																							1																	1
CARS																														1										1
CARS2																																					1			1
CARTPT																							1																	1
CASC1																																1			1					2
CASC3																																					1			1
CASC4																					1																			1
CASD1																					1																			1
CASKIN2																																					1			1
CASP2																														1										1
CASP3																	1																		1					2
CASP8																																		1						1
CASR													1		1																									2
CAST			1																																					1
CATSPER1			1																																					1
CATSPER2																							1				1													2
CATSPERB																																			1					1
CAV2			1																																					1
CBFA2T3																																1								1
CBLB																																								0
CBR3																																			1					1
CBX2																							1																	1
CBX5																							1																	1
CBX6													1		1											1		1												4
CBX7																																								0
CBX8													1		1													1		1										4
CBY1																											1										1			2
CC2D1A	1																						1																	2
CC2D1B																										1														1
CC2D2B																																								0
CCBE1																							1																	1
CCDC102A																			1				1																	2
CCDC111																							1																	1
CCDC113					1		1																																	2
CCDC114																										1														1
CCDC115																							1																	1
CCDC120																																								0
CCDC125																																			1					1
CCDC126																																					1			1
CCDC129																							1																	1
CCDC132																																								0
CCDC134																										1														1
CCDC135																											1													1
CCDC136																			1																					1
CCDC142																																					1			1
CCDC146																			1																					1
CCDC147																											1													1
CCDC22																											1													1
CCDC3																																								0
CCDC36																																					1			1
CCDC38	1																																							1
CCDC52																							1																	1
CCDC53																														1										1
CCDC54																										1														1
CCDC58																																			1		1			2
CCDC6																																					1			1
CCDC64																																					1			1
CCDC64B																							1																	1
CCDC68																											1													1
CCDC7																																			1		1			2
CCDC70																																			1					1
CCDC75					1		1																																	2
CCDC81									1		1																								1					3
CCDC82																												1												1
CCDC85A			1																																					1
CCDC86																							1														1			2
CCDC87																																					1			1
CCDC88C																																					1			1
CCDC93																										1						1								2
CCDC94																																								0
CCHCR1	1																																							1
CCK																							1																	1
CCL1	1																																					1		2
CCL11					1		1																1																	3
CCL13																							1																	1
CCL17																			1																					1
CCL18																																					1			1
CCL19																	1																							1
CCL2																																			1					1
CCL21																																								0
CCL22																					1																			1
CCL23	1																																							1
CCL28					1		1																																	2
CCL5																						1				1	1													3
CCNA1																																			1					1
CCNB1														1																										1
CCNB1IP1																					1																			1
CCNB2													1		1																									2
CCNC																																			1					1
CCND1		1								1		1		1		1				1									1											7
CCND2								1		1		1		1		1													1											6
CCNE1																			1																					1
CCNF			1																																					1
CCNG1									1		1						1	1			1																			5
CCNH																																1								1
CCNJ																	1											1												2
CCNJL																											1													1
CCNT1									1		1																													2
CCNT2										1																														1
CCNYL1													1		1																									2
CCPG1																																1								1
CCR1																											1													1
CCR3																	1																							1
CCR5																																			1					1
CCR7																											1													1
CCR8									1		1																1													3
CCRK																							1																	1
CCT6A			1																																					1
CCT6B	1																		1																					2
CCT8L2									1		1																								1					3
CD109																																1								1
CD14																																			1					1
CD163L1																																			1					1
CD1A																	1																	1						2
CD1B																										1														1
CD1D																	1																							1
CD1E																																								0
CD226																																			1					1
CD244																																					1			1
CD248																																								0
CD27																											1													1
CD274																																1								1
CD276			1																																					1
CD2AP																					1																			1
CD300LB																																								0
CD300LF																																								0
CD300LG																							1														1			2
CD302																																			1					1
CD33																														1										1
CD34			1																																					1
CD36																	1																							1
CD38																																			1					1
CD3D																										1														1
CD3E																							1																	1
CD3EAP														1																										1
CD4		1		1																	1	1	1																	5
CD40																				1							1										1			3
CD44																1							1		1					1							1			5
CD46	1																																							1
CD47																								1																1
CD53			1																																					1
CD59													1		1																									2
CD5L																										1														1
CD6																							1																	1
CD68																			1																					1
CD7																											1													1
CD70																											1										1			2
CD72			1																																		1			2
CD79A										1		1		1		1													1											5
CD81																											1													1
CD84																																			1					1
CD8A																				1			1				1													3
CDADC1																																1								1
CDAN1																																								0
CDC14A									1		1																								1					3
CDC20B																																					1			1
CDC23	1																																							1
CDC25B																											1													1
CDC25C										1		1		1		1													1											5
CDC2L5									1		1																										1			3
CDC2L6			1																																					1
CDC37L1	1																		1																					2
CDC40	1																																							1
CDC42																1									1															2
CDC42BPA																																			1					1
CDC42BPB																			1																					1
CDC42BPG																																					1			1
CDC42EP1																							1																	1
CDC42EP2																																					1			1
CDC42EP4																							1																	1
CDC42EP5																							1																	1
CDC42SE2																			1																					1
CDC6																					1																			1
CDC7																										1									1		1			3
CDC73																												1							1					2
CDCA2																										1														1
CDCA3																			1																					1
CDCP1																											1													1
CDH1										1		1		1		1																								4
CDH12																																			1					1
CDH13																			1																2					3
CDH16																											1								1					2
CDH17										1						1																								2
CDH19																																			1					1
CDH20																							1																	1
CDH22																							1																	1
CDH3																							1																	1
CDH5																1																								1
CDH6																	1																							1
CDH9																																			1					1
CDIPT																														1										1
CDK2		1																		1		1																1		4
CDK5RAP2																	1																							1
CDK5RAP3																											1										1			2
CDK6																		1			1																			2
CDKL2																	1																							1
CDKL3																												1												1
CDKL5																																			1					1
CDKN1A		1														1		1		1		1																1		6
CDKN1B		1								1		1		1		1						1							1		1							1		9
CDKN1C		1																				1													1			1		4
CDKN2A																		1		1																				2
CDKN2AIP																																					1			1
CDKN2B																																								0
CDKN3					1		1		1		1																													4
CDO1																																								0
CDON										1		1		1		1													1											5
CDR2																																								0
CDRT4																																1								1
CDS1			1																																					1
CDT1																					1																			1
CDV3																																			1					1
CDYL													1		1																									2
CEACAM19																					1																			1
CEACAM4																																					1			1
CEBPE			1																																					1
CEBPG																																1								1
CEBPZ																				1						1														2
CECR2																												1												1
CECR5																																			1					1
CEL																							1																	1
CELSR1																							1																	1
CELSR3																							1																	1
CENPA																																								0
CENPE																																			1					1
CENPI																																			1					1
CENPJ																																			1					1
CENPQ			1																									1												2
CENPT																																								0
CENTA1																							1																	1
CENTD1			1																																					1
CENTD3																																					1			1
CENTG1																																			1					1
CEP104																																1								1
CEP110																			1																					1
CEP164																																					1			1
CEP192																																					1			1
CEP250																							1				1													2
CEP290																																					1			1
CEP350																			1																1		1			3
CEP68																											1													1
CEP72																			1																					1
CES3					1		1																																	2
CFD														1																										1
CFDP1																										1														1
CFHR5																																			1					1
CFI																																					1			1
CFLAR					1		1																									1								3
CGA																											1								1		1			3
CGGBP1									1		1																													2
CGN																										1														1
CGREF1									1		1												1																	3
CGRRF1																																			1					1
CHAC2																			1																					1
CHAD																										1														1
CHAF1A																																			1					1
CHCHD4																																		1						1
CHCHD8																																								0
CHD1L																							1							1										2
CHD2													1		1												1					1								4
CHD3																																								0
CHD4																																						1		1
CHD9									1		1																								1					3
CHFR																																					1			1
CHIA																																					1			1
CHIC1																																			1					1
CHM													1		1				1																					3
CHML																											1										1			2
CHMP2B																														1										1
CHMP4B					1		1																																	2
CHN2													1		1																									2
CHORDC1																																			1					1
CHP																					1														1					2
CHP2																																					1			1
CHPT1									1		1																													2
CHRD														1								1									1									3
CHRDL2																							1																	1
CHRM1																											1													1
CHRM2																																			1					1
CHRNA10																										1	1													2
CHRNA4																							1																	1
CHRNA5																			1																					1
CHRNA6													1		1								1					1				1								5
CHRNA9																																			1					1
CHST3																1																								1
CHST4									1		1																										1			3
CHST5																																								0
CHST7																					1																			1
CHST8																							1																	1
CHST9																																			2					2
CHSY1																							1																	1
CHSY3																																			1					1
CIAO1																							1																	1
CIB1		1																				1																1		3
CIB2																																								0
CIDEB																																		1			1			2
CINP																																		1						1
CIR																											1													1
CIRBP																											1													1
CISH				1										1				1																						3
CITED1																																			1					1
CITED2																	1																							1
CKAP2																		1																						1
CKAP2L					1		1																							1					1					4
CKAP4																1		1																	1					3
CKAP5																																					1			1
CKLF													1		1													1												3
CKMT2																																					1			1
CKS2																											1													1
CLASP1																																1								1
CLASP2													1		1																									2
CLCA2																																					1			1
CLCA3																																			1					1
CLCF1																																								0
CLCN4																							1							1										2
CLCN5																					1																1			2
CLCN6																																1								1
CLCN7																							1																	1
CLDN16			1																																					1
CLDN20																																					1			1
CLDN4																										1														1
CLDN5																							1																	1
CLDN8																							1												1					2
CLDN9																																								0
CLDND1													1		1																									2
CLEC11A																							1																	1
CLEC12A																																								0
CLEC12B																																			1		1			2
CLEC16A																																								0
CLEC1A																	1																							1
CLEC2B																			1																1					2
CLEC3A																																					1			1
CLEC4A																																		1						1
CLEC4D	1																																							1
CLEC4E																																			1					1
CLEC4F																																			1					1
CLEC4G																																			1					1
CLECL1																					1														1					2
CLIC5																											1													1
CLINT1																			1																					1
CLIP1													1		1												1										1			4
CLIP2																											1	1												2
CLIP4																																		1						1
CLK3																					1						1													2
CLN3																											1													1
CLN6																							1																	1
CLOCK																														1					1					2
CLPTM1	1																																							1
CLRN1																			1																					1
CLRN3									1		1																								1					3
CLTC																	1		1																					2
CLTCL1																										1														1
CLU																																					1			1
CMKLR1																																			1					1
CMPK1																										1														1
CMTM3					1		1																																	2
CMTM8																											1													1
CNBD1																																			1					1
CNGA1																																			1					1
CNGA3																																1					1			2
CNIH																							1																	1
CNIH2																																					1			1
CNIH4			1																																					1
CNKSR1																																					1			1
CNKSR3	1																																							1
CNN1																											1													1
CNN3																							1																	1
CNNM1																																					1			1
CNOT1	1		1																																					2
CNOT10																																			1					1
CNOT3																																								0
CNOT4					1		1																																	2
CNOT6																												1												1
CNOT8			1																																					1
CNP																							1									1								2
CNR1																										1														1
CNTFR																											1							1						2
CNTLN																	1																							1
CNTN3		1																				1																1		3
CNTN6																											1													1
CNTNAP1					1		1												1																					3
CNTNAP2			1																																					1
COASY																							1																	1
COBLL1																																		1						1
COBRA1																																								0
COG7																																			1					1
COL10A1			1																																					1
COL11A1																			1																1					2
COL12A1									1		1																													2
COL17A1																												1												1
COL18A1																																1								1
COL19A1																					1																			1
COL1A1						1																										1								2
COL1A2						1								1		1							1																	4
COL20A1																																		1						1
COL21A1																							1																	1
COL24A1																										1														1
COL3A1						1																	1																	2
COL4A1														1		1	1																							3
COL4A2																											1													1
COL4A3																							1																	1
COL4A4																							1																	1
COL5A1					1		1																																	2
COL6A2																											1													1
COL6A3																											1					1								2
COL6A6																																1								1
COL7A1																							1				1										1			3
COL9A3																							1																	1
COMMD1																																								0
COMMD3													1		1													1												3
COMMD4																																					1			1
COMMD6																												1		1										2
COMMD8					1		1																														1			3
COMMD9																																1								1
COMP														1								1									1									3
COMT																										1														1
COP1																			1																		1			2
COPB1																							1																	1
COPE																											1													1
COPG																																			1					1
COPG2																							1																	1
COPS2																			1																1					2
COPS4																							1																	1
COPS7B																											1										1			2
COQ2	1																																		1					2
COQ3																																			1					1
COQ5																							1																	1
COQ6																																								0
COQ7			1																																					1
CORO1A		1																				1	1															1		4
CORO1B																							1																	1
CORO1C																										1														1
CORO2A																																								0
CORO2B	1																																							1
COX10	1																																							1
COX15																											1								1					2
COX18																																			1					1
COX19	1																																							1
COX4I2																																								0
COX4NB																							1				1													2
COX5A																										1														1
COX6A2																											1													1
COX6BP1																																								0
COX6C																																			1					1
COX7A2L																										1														1
COX7B2																																			1					1
COX8A				1						1				1		1		1		1		1		1														1		9
CPA5																																								0
CPAMD8																			1																					1
CPEB2					1		1						1		1																									4
CPEB3					1		1						1		1																									4
CPEB4													1		1																									2
CPLX2																											1													1
CPN1																										1				1										2
CPNE1																							1																	1
CPNE5																																								0
CPNE6																											1													1
CPNE7																										1														1
CPSF2																					1																			1
CPT1C			1																																					1
CPT2																																			1					1
CPZ	1																																							1
CR1																																								0
CRABP2																																					1			1
CRADD																							1																	1
CRAMP1L																																			1					1
CRAT																							1																	1
CRB1																							1																	1
CREB1		1							1	1	1	1		1				1		1																				8
CREB3																	1																							1
CREB3L1																																								0
CREB3L2																					1					1														2
CREB3L3																																								0
CREB5																			1																					1
CREBL2																											1										1			2
CREBZF																																						1		1
CREG1																												1												1
CREG2																																								0
CRELD1																																								0
CRHBP																																								0
CRIM1				1																1			1																	3
CRIP2									1		1																													2
CRIPT																																			1					1
CRISP1																																		1						1
CRISPLD2																										1														1
CRK	1																																							1
CRKL																			1																					1
CRLF1																																					1			1
CRLS1																										1														1
CRNN																										1														1
CROCC																																								0
CROP																			1																					1
CROT	1																																							1
CRTAM																					1																			1
CRTC1																																			1					1
CRTC2																																								0
CRTC3																																1								1
CRYAA																							1																	1
CRYAB																							1																	1
CRYBB2																											1													1
CRYBB3																							1																	1
CRYL1																			1																					1
CSF1			1	1																1												1								4
CSF1R																			1	1																				2
CSGlcA-T																																					1			1
CSH1								1		1																														2
CSHL1																																								0
CSMD3																					1																			1
CSNK1A1										1		1		1		1							1						1						1					7
CSNK1G2																																			1					1
CSNK1G3																							1			1									1					3
CSNK2A1																																					1			1
CSNK2B																																			1					1
CSRP2BP																																					1			1
CSRP3																					1																			1
CST1																																					1			1
CST11																			1		1																			2
CST2																																					1			1
CST5																										1											1			2
CSTA									1		1																													2
CSTF2T																							1																	1
CSTF3	1																																							1
CSTL1			1																																					1
CTA-126B4.3																																					1			1
CTAGE1					1		1																																	2
CTBS																																			1					1
CTDP1																							1														1			2
CTDSPL2																																					1			1
CTGF												1																												1
CTNNB1												1																												1
CTNND2									1		1																								1					3
CTPS2																																			1					1
CTRC																																			1					1
CTSA	1																																							1
CTSB																										1								1						2
CTSC																	1													1										2
CTSE			1																																					1
CTSK																																					1			1
CTSL1					1		1																																	2
CTSO																																			1					1
CTTNBP2					1		1																												1					3
CTTNBP2NL																														1							1			2
CTXN3													1		1													1												3
CUEDC2																							1																	1
CUGBP1																														1										1
CUGBP2																																					1			1
CUL3																																					1			1
CUL4B																																			1					1
CUL5																					1																			1
CUTA																							1																	1
CUTL1																																								0
CUX1					1		1																																	2
CUZD1																																								0
CX3CL1																							1																	1
CX3CR1																							1																	1
CXADR																																			1					1
CXCL12				1																																				1
CXCL3																1																								1
CXCR3																																					1			1
CXCR4				1						1																			1											3
CXCR7																			1																					1
CXorf21			1																1													1								3
CXorf27																																			1					1
CXorf30			1														1																							2
CXorf36																							1																	1
CXorf39																					1																			1
CXorf41																											1	1							1					3
CXorf45																																			1					1
CXorf57																																					1			1
CXorf59																																		1						1
CXXC4																							1														1			2
CXXC5																					1																			1
CYB561D2																							1																	1
CYB5B																			1											1										2
CYB5R4			1		1		1																																	3
CYBA																			1																					1
CYBB																																			1					1
CYBRD1																							1																	1
CYCS																																			1					1
CYFIP1									1		1																													2
CYFIP2																											1													1
CYGB																																								0
CYP11A1																																					1			1
CYP11B1																												1												1
CYP24A1																	1																							1
CYP26B1									1		1																													2
CYP2C8									1		1																													2
CYP2D7P1																																								0
CYP3A43									1		1																													2
CYP3A5																											1													1
CYP4F12																																			1					1
CYP4F2																																			1					1
CYP4V2																			1																					1
CYP4X1					1		1																				1													3
CYP7A1																				1																				1
CYYR1																																1								1
D4S234E																	1																							1
DAAM1																																					1			1
DACH2																			1																					1
DACT3																																								0
DAG1																																		1						1
DAGLB																																					1			1
DAND5																					1																			1
DAO																																					1			1
DAPK1																																1								1
DAPP1					1		1																												1					3
DARS									1		1																													2
DARS2					1		1												1								1													4
DAZL																	1																							1
DBC1																																					1			1
DBF4																										1														1
DBF4B					1		1																																	2
DBH																																					1			1
DBP						1		1											1																					3
DBR1																					1																			1
DBT																																			1					1
DC2																										1														1
DCDC2B																																								0
DCHS1																																			1					1
DCHS2																																			1					1
DCLK1																																			1					1
DCLK2	1																																							1
DCLK3																							1											1						2
DCP1A																							1																	1
DCP2					1		1										1																							3
DCST2																																					1			1
DCTD																																			1					1
DCTN2																										1														1
DCTN3																																								0
DCTN4																																								0
DCTN5													1		1													1												3
DCUN1D3																							1																	1
DCX																																								0
DDAH2																														1										1
DDB2																							1																	1
DDC																																					1			1
DDEF1			1															1																						2
DDEF2																			1																					1
DDHD1	1																1				1																			3
DDI2																																1								1
DDIT4																																						1		1
DDIT4L																											1													1
DDOST									1		1																										1			3
DDR2																							1			1	1													3
DDX1																							1																	1
DDX17	1																													1										2
DDX20													1		1					1																		1		4
DDX23			1																																					1
DDX25													1		1																									2
DDX31																																			1					1
DDX42																																								0
DDX47																																			1					1
DDX5																																			1			1		2
DDX50																			1																					1
DDX51																																								0
DDX53																			1											1					1					3
DDX56																										1														1
DDX60																																			1					1
DDX60L																																			1					1
Dec-01																	1																							1
DECR1														1								1																		2
DEF6																											1													1
DEF8																																					1			1
DEFB1																																					1			1
DEFB123																			1																					1
DEFB127			1																																					1
DENND1B	1																																							1
DENND2C	1																																							1
DENND2D			1																								1													2
DENND4A																																			1					1
DENR																																			1					1
DEPDC2																					1																			1
DEPDC5																							1																	1
DEPDC6					1		1																																	2
DERL2	1																																							1
DET1																					1																			1
DFFB																							1																	1
DFNB31																																								0
DFNB59																			1																1					2
DGCR8																1																								1
DGKB	1																																							1
DGKE																																			1					1
DGKG																							1																	1
DGKZ																																					1			1
DHCR24																																					1			1
DHDDS																			1																					1
DHFRL1																																					1			1
DHH										1		1		1		1													1											5
DHRS12																			1																					1
DHRS3																							1			1											1			3
DHX16																																					1			1
DHX33																														1										1
DHX34																											1													1
DHX36	1																																							1
DHX38																							1				1													2
DHX40																										1														1
DHX58																											1													1
DIABLO																	1																							1
DIAPH1																																1								1
DICER1		1		1										1		1		1		1		1											1					1		9
DIDO1																							1																	1
DIMT1L																																			1					1
DIO1																										1														1
DIO2																																								0
DIP2A																																1								1
DIRAS2																												1												1
DIRAS3																	1																		1					2
DIS3																										1														1
DIS3L2																																					1			1
DISC1																																								0
DISP1																			1								1													2
DKFZP434L187																																								0
DKFZP564O0523																			1																					1
DKFZP586H2123																																								0
DKK2																																			1			1		2
DKK3																											1													1
DLAT																																			1					1
DLC1										1																		1												2
DLG1																	1																							1
DLG5			1																		1																1			3
DLGAP2																																			1					1
DLGAP4																							1																	1
DLK1						1																					1													2
DLL1				1																																				1
DLL3																							1																	1
DLX1																																					1			1
DLX3																																					1			1
DMBT1																																					1			1
DMBX1																																					1			1
DMGDH																																			1		1			2
DMKN																							1																	1
DMP1																																					1			1
DMRT1																																					1			1
DMRT3																														1										1
DMRTB1																							1																	1
DMRTC2																											1								1					2
DMTF1										1																														1
DNA2					1		1												1																					3
DNAH8																																			1					1
DNAI2																											1								1					2
DNAJA3																											1													1
DNAJB1																																								0
DNAJB11																																			1					1
DNAJB14																																		1	1					2
DNAJB5																												1												1
DNAJB6																																					1			1
DNAJB7																1																								1
DNAJB8																														1										1
DNAJC1																																			1					1
DNAJC13									1		1																													2
DNAJC14																										1														1
DNAJC16																																								0
DNAJC18																											1													1
DNAJC21																	1																							1
DNAJC3																																			2					2
DNAJC4																										1														1
DNAJC5B																							1																	1
DNAJC5G																							1																	1
DNAJC7					1		1												1																					3
DNASE1																																			1					1
DNASE1L1																																					1			1
DNER																																			1					1
DNHD1																																			1		1			2
DNHL1																																			1					1
DNM1																																					1			1
DNM2																																								0
DNM3																																					1			1
DNMT1																																			1					1
DNMT3A																				1																				1
DNMT3B	1																																	1						2
DNMT3L																														1										1
DNPEP																																					1			1
DNTTIP2																																					1			1
DOCK1																																			1					1
DOCK2																																1								1
DOCK4																												1												1
DOCK8																																			1					1
DOCK9																					1																			1
DOK4																																								0
DOLPP1																							1																	1
DOM3Z																							1																	1
DOPEY1																																					1			1
DOT1L																							1																	1
DPEP2									1		1																			1										3
DPF1					1		1																												1					3
DPH2																																					1			1
DPH3																			1													1								2
DPH3P1																																1								1
DPH4			1																																					1
DPM3																																			1					1
DPP3																																			1		1			2
DPP4																														1										1
DPP6			1																													1								2
DPP7																							1																	1
DPPA4																	1																							1
DPT										1																														1
DPY19L2																	1																							1
DPYS																							1																	1
DPYSL2																																			1					1
DPYSL4																											1													1
DR1									1		1																													2
DRAM																																			1					1
DRD1	1																																							1
DRD2																							1																	1
DRD3																										1														1
DSCR4																							1														1			2
DSG1																							1																	1
DSN1																																			1					1
DST																					1																			1
DSTYK																																1								1
DTD1																							1																	1
DTL																																1								1
DTNA													1		1																				1					3
DTNB																							1																	1
DTNBP1																																					1			1
DTWD1																																					1			1
DTX2																											1													1
DTX3																			1																					1
DUOX2																											1			1										2
DUSP15																							1																	1
DUSP16																							1											1						2
DUSP18	1																																							1
DUSP19																			1																					1
DUSP2	1																																							1
DUSP27																																			1					1
DUSP28																																								0
DUSP3																																								0
DUSP5																																1								1
DUSP8					1		1																												1					3
DVL1																																					1			1
DVL3																							1																	1
DYDC1																					1														1					2
DYM																							1														1			2
DYNC1LI2																			1																					1
DYNC2H1																														1										1
DYNLL2			1																																					1
DYNLRB2													1		1													1												3
DYNLT3																			1																					1
DYRK1A									1		1																													2
DYRK1B					1		1																																	2
DYRK3									1		1																1													3
DYRK4									1		1																													2
DYX1C1													1		1																									2
DZIP1																							1																	1
DZIP1L																							1																	1
E2F1		1																		1		1			1													1		5
E2F2																				1			1																	2
E2F3	1											1		1		1		1		1									1											7
E2F5	1																																							1
E2F7																							1																	1
E2F8																																								0
E4F1																							1																	1
EBF2																																								0
EBF3																										1											1			2
EBF4																																								0
EBI3																										1														1
ECHDC1																																1								1
ECHDC2																	1																							1
ECM1																										1														1
EDA					1		1																				1													3
EDA2R	1																																							1
EDARADD	1																																							1
EDG1																																					1			1
EDG2																				1																				1
EDG3																																			1					1
EDG5	1																																		1					2
EDG7									1		1																													2
EDIL3																	1															1			1					3
EDN1																																					1			1
EDN3																																					1			1
EED																																					1			1
EEF1A1																																1			1					2
EEF1E1																																					1			1
EEF2K																					1						1													2
EEFSEC																																			1					1
EEPD1																																			1					1
EFCAB1																											1								1					2
EFCAB4B																																			1		1			2
EFCAB5																																					1			1
EFCAB6																											1													1
EFEMP1																					1														1		1			3
EFEMP2																											1													1
EFHC2																					1																			1
EFNA1																							1												1					2
EFS																																					1			1
EGF										1		1		1		1													1											5
EGFL6																																			2					2
EGFL7																					1		1																	2
EGFLAM																			1													1								2
EGFR												1		1		1				1		1							1											6
EGLN1	1																											1												2
EGR2										1											1																1			3
EGR4																							1				1													2
EHD1																												1									1			2
EHD2																																								0
EHD4					1		1																																	2
EHF																																1								1
EHMT1																			1																					1
EID2B																																					1			1
EIF1																																					1			1
EIF1AY																																			1		1			2
EIF2A																																			1					1
EIF2AK1																																			1					1
EIF2AK2																					1						1													2
EIF2AK3	1																		1																					2
EIF2B1																																					1			1
EIF2B4																														1										1
EIF2C1																1																1								2
EIF2C2	1	1														1				1																		1		5
EIF2S1					1		1																												1					3
EIF3D																							1			1														2
EIF3J																			1							1														2
EIF3K									1		1																													2
EIF4A2																							1																	1
EIF4E										1																														1
EIF4EBP1																																					1			1
EIF4G3																																					1			1
EIF5A																			1																					1
EIF5A2																					1																			1
ELAVL2																																					1			1
ELF1																										1														1
ELF3																							1																	1
ELF4																										1														1
ELFN2																							1				1								1					3
ELK3																			1																1					2
ELL													1		1																									2
ELL2			1																																					1
ELMO2			1																																					1
ELMOD1																																			1		1			2
ELOVL1																																			1					1
ELOVL3																							1																	1
ELOVL4																																			1					1
ELOVL6																											1								1					2
ELP2																							1																	1
ELSPBP1																						1																1		2
ELTD1																																		1						1
EMCN																			1																					1
EME1																							1																	1
EMG1																														1										1
EMID1																																								0
EMILIN3																											1													1
EML1																																			1					1
EML4																					1																			1
EMR2																																			1					1
EMR3																										1														1
EN2																																1								1
ENAH																																								0
ENC1																										1														1
ENDOD1			1																																					1
ENDOG													1		1													1												3
ENDOGL1																		1																						1
[truncated: 4,865 more rows]
