# Supplementary material for: MicroRNAs Associated with the Efficacy of Photodynamic Therapy in Biliary Tract Cancer Cell Lines
Source: MDPI journal article supplement (doi:10.3390/ijms151120134), 2014-11-05
Supplement: s1 [file s1 › ijms-58226_Revision_Suppl 05 number targets per miRNA.xlsx]

## Sheet: Supplement 05
Predicted and validated targets of 'phototox-' and 'resistive-miRs'.
	'Phototox-miRs'
	25	106b	130a	516b-3p	664	93*	489
n predicted targets	336	369	324	295b	1179	1011	284
n validated targets	66	62	70	0	4	102	9
n total targets	402	431	394	295b	1183	1113	293
n overlap pred./val. Targets	3	2	1	0	0	0	0
n associated GO terms	184	252	168	13	11	221	24
	'Resistive-miRs'
	141	200c	200a	200b	429	326	203	135a	135b	330	20a*	590-5p
n predicted targets	252	191	252	191	219	925	276	288	288	1068a	418	141
n validated targets	137	162	117	131	84	22	89	42	29	9a	101	4
n total targets	389	353	369	322	303	947	365	330	317	1077	519	145
n overlap pred./val. Targets	4	5	3	3	1	1	1	2	1	0	0	0
n associated GO terms	73	369	282	361	262	43	312	55	23	79	340	12
a ... targets of miR-330-3p and miR-330-5p
b ... miRDB was used for target prediction in this case
