# Supplementary material for: MicroRNAs Associated with the Efficacy of Photodynamic Therapy in Biliary Tract Cancer Cell Lines
Source: MDPI journal article supplement (doi:10.3390/ijms151120134), 2014-11-05
Supplement: s1 [file s1 › ijms-58226_Revision_Suppl 07 uptake-corrected phototoxicity.xlsx]

## Sheet: Tabelle1
	mTHPC (0.588 µM)												Photofrin (1.2 µg/ml)
	Data from Ref. #13, treatment with 400 mJ/cm²						current data set, treatment with 650 mJ/cm²						current data set, treatment with 4300 mJ/cm²
	uptakea		phototoxb		corr. phototoxd		uptakea		phototoxc		corr. phototoxd		uptakea		phototoxc		corr. phototoxd
	mean	SEM	mean	SEM	mean	errore	mean	SEM	mean	SEM	mean	errore	mean	SEM	mean	SEM	mean	errore
SkChA-1	29.8922	8.64451	15.9682	8.41574	0.534194	0.321135	25.9073	10.8222	22.45	15.38	0.866552	0.695312	41.4347	10.0909	-3.2	19.24	-0.0772299	0.464726
TFK-1	46.5013	14.2205	28.1455	3.58103	0.605263	0.200476	30.8136	12.6704	39.72	6.04	1.28904	0.565129	44.7454	9.90349	40.21	14.3	0.89864	0.376424
MzChA-1	36.6041	5.60294	48.4542	2.84788	1.32374	0.217046	19.9287	7.96397	60.6	3.6	3.04084	1.22855	39.6216	7.92604	60	12.88	1.51433	0.444344
EGI-1	50.9574	9.98044	45.6947	4.2577	0.896724	0.194493	70.2078	32.3405	74.97	2.97	1.06783	0.493701	83.9579	23.5309	51.69	22.27	0.615666	0.316438
GBC	43.6021	11.4642	64.7397	1.61881	1.48478	0.392154	27.6546	11.2129	81.53	4.36	2.94815	1.20572	42.6018	8.10726	73.86	4.87	1.73373	0.349177
BDC	52.8269	12.2396	65.1653	2.86958	1.23356	0.290923	39.6709	16.8151	82.92	6.67	2.0902	0.901777	64.0738	17.1874	84.22	6.63	1.31442	0.367455
MzChA-2	80.6906	3.97779	84.6034	4.34807	1.04849	0.0746675	60.314	22.9698	92.22	2.77	1.529	0.584106	60.5987	17.2067	80.71	8.81	1.33188	0.405162
CCSW-1	100	16.5183	77.1338	4.41102	0.771338	0.134832	100	52.5118	94.36	1.25	0.9436	0.495659	100	26.5145	94.02	2.53	0.9402	0.25057
a…relative uptake calculated by fluorescence intensity divided by protein content
b…relative to untreated control
c…relative to initial viability values (at time of treatment, i.e. 0 hrs)
d…uptake-corrected phototoxicity calculated by phototoxicity values divided by respective uptake values
e…error calculated according to the Gaussian law of error propagation
